# Supplementary material for: USP7 Is a Tumor-Specific WNT Activator for APC-Mutated Colorectal Cancer by Mediating β-Catenin Deubiquitination
Source: PubMed Central journal article supplement (PMC5656747; doi:10.1016/j.celrep.2017.09.072), 2017-10-17
Supplement: mmc2.pdf [file mmc2.pdf]

## USP7 Is a Tumor-Specific WNT Activator for APC-Mutated Colorectal Cancer by Mediating $\beta$ -Catenin Deubiquitination

### Graphical Abstract

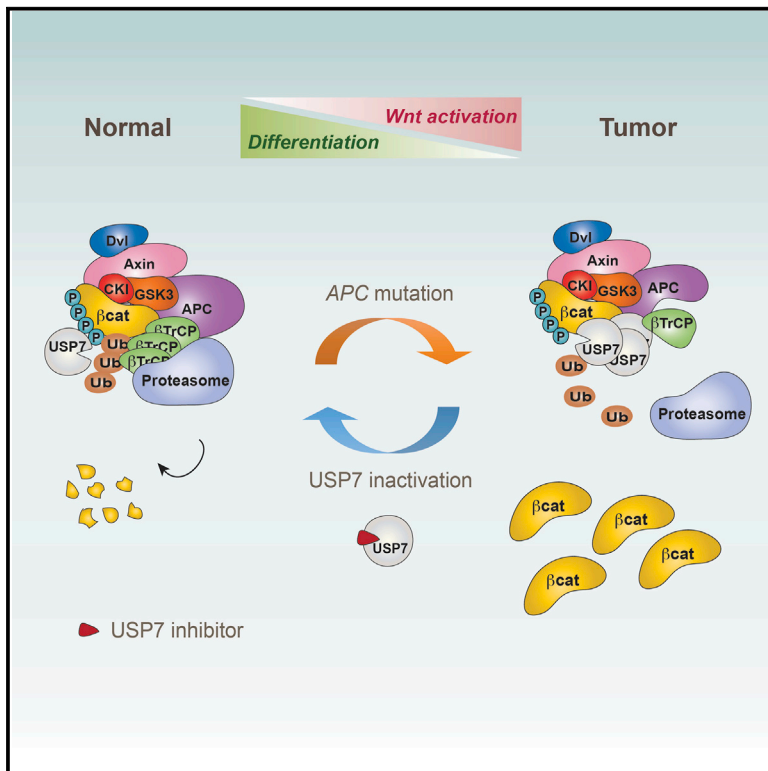

### Authors

Laura Novellademunt, Valentina Foglizzo, Laura Cuadrado, ..., Vesela Encheva, Ambrosius P. Snijders, Vivian S.W. Li

### Correspondence

vivian.li@crick.ac.uk

### In Brief

Novellademunt et al. find that an APC-truncating mutation activates Wnt signaling by promoting USP7-mediated  $\beta$ -catenin deubiquitination. USP7 inhibition significantly suppresses tumor growth of APC-mutated colon cancer cells but does not affect cells with wild-type APC, suggesting that it can be used as a tumor-specific drug target.

### Highlights

- APC CID protects  $\beta$ -catenin from USP7-mediated deubiquitination
- APC lacking CID exposes  $\beta$ -catenin to USP7 for deubiquitination
- USP7 depletion inhibits Wnt in APC mutant CRC by restoring  $\beta$ -catenin ubiquitination
- USP7 inactivation suppresses xenograft tumor growth and is tumor specific

### Data and Software Availability

PXD007947

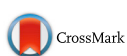

# USP7 Is a Tumor-Specific WNT Activator for APC-Mutated Colorectal Cancer by Mediating $\beta$ -Catenin Deubiquitination

Laura Novellasedemunt,<sup>1</sup> Valentina Foglizzo,<sup>1</sup> Laura Cuadrado,<sup>1</sup> Pedro Antas,<sup>1</sup> Anna Kucharska,<sup>1</sup> Vesela Encheva,<sup>2</sup> Ambrosius P. Snijders,<sup>2</sup> and Vivian S.W. Li<sup>1,3,\*</sup>

<sup>1</sup>The Francis Crick Institute, 1 Midland Road, London NW1 1AT, UK

<sup>2</sup>The Francis Crick Institute, Mass Spectrometry Science Technology Platform, 1 Midland Road, London NW1 1AT, UK

<sup>3</sup>Lead Contact

\*Correspondence: [vivian.li@crick.ac.uk](mailto:vivian.li@crick.ac.uk)

<https://doi.org/10.1016/j.celrep.2017.09.072>

## SUMMARY

The tumor suppressor gene adenomatous polyposis coli (APC) is mutated in most colorectal cancers (CRCs), resulting in constitutive Wnt activation. To understand the Wnt-activating mechanism of the APC mutation, we applied CRISPR/Cas9 technology to engineer various APC-truncated isogenic lines. We find that the  $\beta$ -catenin inhibitory domain (CID) in APC represents the threshold for pathological levels of Wnt activation and tumor transformation. Mechanistically, CID-deleted APC truncation promotes  $\beta$ -catenin deubiquitination through reverse binding of  $\beta$ -TrCP and USP7 to the destruction complex. USP7 depletion in APC-mutated CRC inhibits Wnt activation by restoring  $\beta$ -catenin ubiquitination, drives differentiation, and suppresses xenograft tumor growth. Finally, the Wnt-activating role of USP7 is specific to APC mutations; thus, it can be used as a tumor-specific therapeutic target for most CRCs.

## INTRODUCTION

The canonical Wnt/ $\beta$ -catenin signaling pathway is evolutionarily conserved and plays crucial roles in many biological processes, such as stem cell maintenance and cell fate decision (Clevers and Nusse, 2012). The key downstream modulator of the pathway,  $\beta$ -catenin, is tightly regulated by phosphorylation and ubiquitination-mediated degradation in the cytoplasmic  $\beta$ -catenin destruction complex. The core of the destruction complex consists of the adenomatous polyposis coli (APC), AXIN, glycogen synthase kinase 3 (GSK3), and casein kinase 1 (CK1).  $\beta$ -catenin is first phosphorylated by CK1 and GSK3, followed by recruiting of the E3 ubiquitin ligase  $\beta$ -TrCP to the destruction complex for ubiquitination and subsequent proteasomal degradation (Aberle et al., 1997; Kitagawa et al., 1999; Liu et al., 2002).

Aberrant Wnt activation has been associated with many human cancer types, especially colorectal cancer (CRC) (Clevers and Nusse, 2012; MacDonald et al., 2009; Vogelstein and Kinzler, 2004). Mutations in Wnt pathway components are

frequently observed in CRC (Novellasedemunt et al., 2015). The APC truncating mutation is the hallmark of the vast majority of human CRCs. Its loss initiates adenoma formation through constitutive Wnt activation (The Cancer Genome Atlas Network, 2012; Nagase and Nakamura, 1993). Most APC somatic mutations occur in the “mutation cluster region” (MCR) between codons 1,286 and 1,513 (Polakis, 1995; Vogelstein and Kinzler, 2004). Region-specific APC mutations have been associated with distinct  $\beta$ -catenin transcriptional activity and tumor susceptibility (Gaspar and Fodde, 2004). Different functional domains have been described in the central region of the APC protein, including the  $\beta$ -catenin-binding 15- and 20-amino-acid repeats and the Axin-binding Ser-Ala-Met-Pro motif (SAMP) repeats that are crucial for regulating  $\beta$ -catenin level. We have previously shown that APC truncation activates Wnt/ $\beta$ -catenin signaling through abrogation of  $\beta$ -catenin ubiquitination within the destruction complex in CRCs, while assembly of the complex is not affected (Li et al., 2012). However, the molecular mechanism of how APC truncation inhibits  $\beta$ -catenin ubiquitination remains elusive. Several studies have identified yet another highly conserved regulatory domain in APC, the  $\beta$ -catenin inhibitory domain (CID), which is located between the second and the third 20-amino-acid repeats (Kohler et al., 2009; Roberts et al., 2011). The CID is believed to exert an essential role in downregulating  $\beta$ -catenin levels and Wnt transcriptional activity. Importantly, the CID locates right at the MCR that is lost in most human CRCs, suggesting a functional and clinical significance. Despite the crucial role of the CID in Wnt/ $\beta$ -catenin signaling regulation, little is known about the underlying mechanism. APC CID has been shown to interact with  $\alpha$ -catenin to promote  $\beta$ -catenin ubiquitination by stabilizing the association with APC as well as to repress  $\beta$ -catenin/T cell factor (TCF) transcription in the nucleus in wild-type APC cells (Choi et al., 2013). A more recent study proposed another speculative model: GSK3-mediated phosphorylation around the CID region promotes a conformational change in APC protein that allows the transfer of phospho- $\beta$ -catenin to the E3 ligase (Pronobis et al., 2015).

Protein ubiquitination-mediated degradation is a reversible process that is tightly regulated by E3 ubiquitin ligases and deubiquitinating enzymes (DUBs). The role of DUBs in regulating  $\beta$ -catenin ubiquitination is not well defined, particularly in the context of CRC. Here, we sought to investigate the mechanistic role of the APC mutation in  $\beta$ -catenin ubiquitination and Wnt

**A**

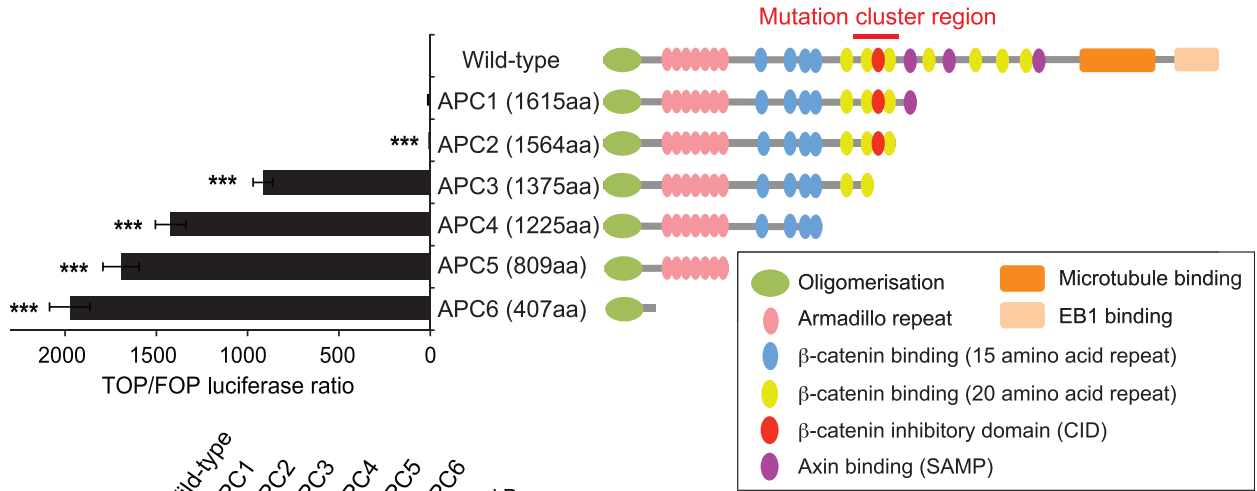

**B**

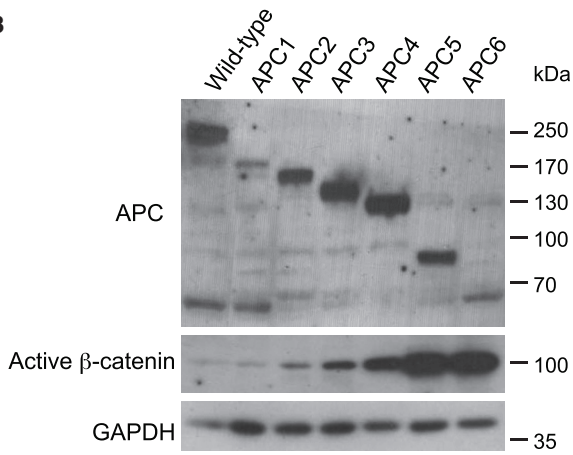

**C**

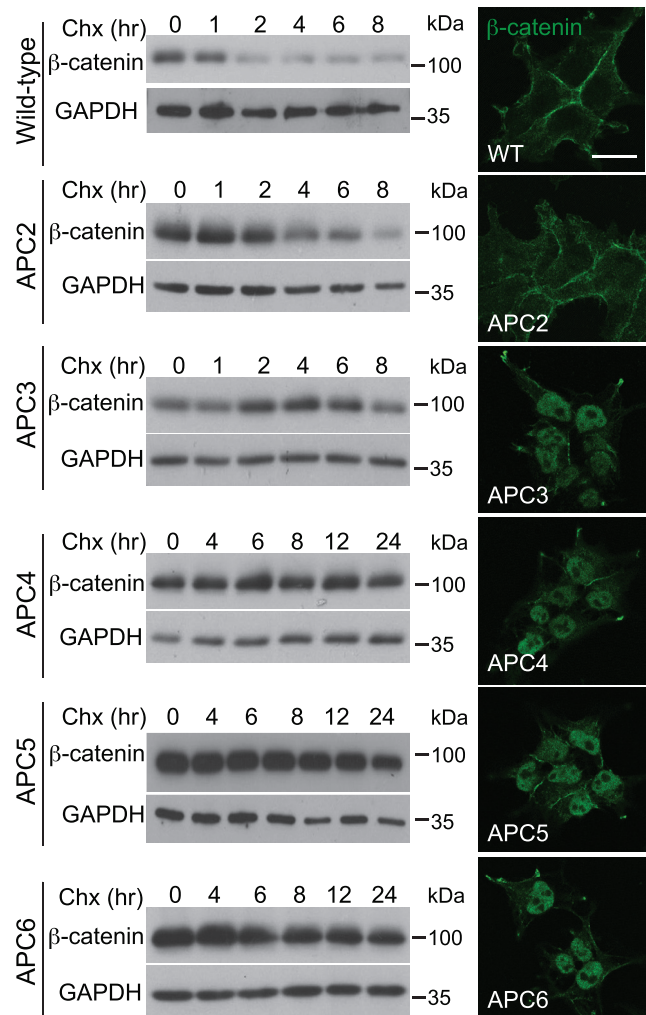

**D**

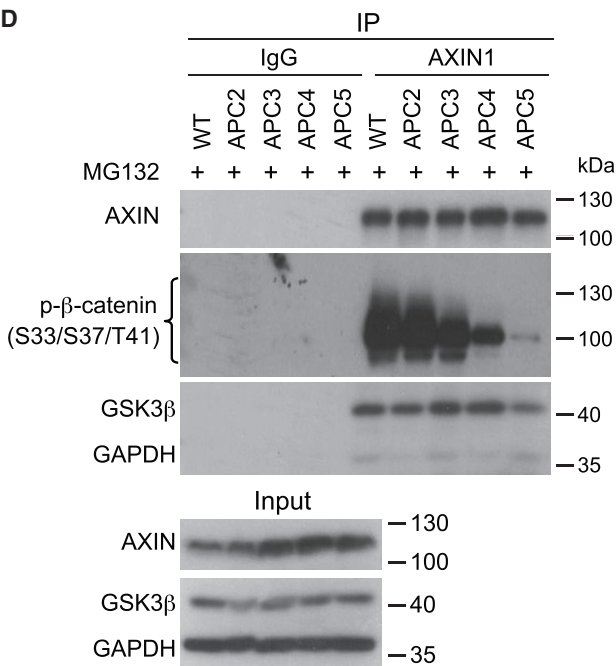

(legend on next page)

activation. We find that the DUB enzyme USP7 is crucial in sustaining pathological, but not physiological, Wnt activation in APC-truncated CRCs by mediating  $\beta$ -catenin deubiquitination.

## RESULTS

### CID Is the Critical Domain for Regulating Wnt Signaling and $\beta$ -Catenin Ubiquitination

To better understand the role of APC truncation in CRC, we first generated various isogenic lines of APC truncating mutations endogenously in wild-type (WT) HEK293T cells with intact Wnt signaling cascade using the CRISPR/Cas9 genome editing technique. Different APC truncating deletions (APC1–6) were generated by targeting the central region of the APC protein sequentially, as shown in Figure 1A (Table S1). A TOPFlash luciferase assay revealed a dramatic upregulation in Wnt/TCF transcription in the APC3 mutant when CID is lost (Figures 1A and S1A). A gradual increase in Wnt signaling was observed upon further truncation (compare APC3–6 in Figure 1A) and confirmed by immunoblotting of APC and active (non-phosphorylated)  $\beta$ -catenin in these mutants (Figures 1B and S1B). Wnt activation of these APC mutants was further analyzed by qRT-PCR of the endogenous Wnt target genes *AXIN2* (Lustig et al., 2002) and *CCND1* (Tetsu and McCormick, 1999) (Figure S1C). Consistently, significant upregulation of these Wnt target genes was observed in APC3–6 mutants. *CTNNB1* mRNA was unchanged among the mutants, demonstrating that accumulation of  $\beta$ -catenin protein occurs post-transcriptionally. Additionally, we did not observe any changes of APC transcription, except in APC6 where APC mRNA was reduced drastically. This could be due to the instability of the short APC transcript, as previously reported (Dihlmann et al., 1999). We further performed endogenous AXIN1 immunoprecipitation (IP) in our CRISPR-targeted APC mutant cells and confirmed the binding of these truncated APC proteins to the destruction complex (Figure S1D). This is consistent with our previous findings that APC truncation does not cause dissociation of the destruction complex (Li et al., 2012).

Next, we examined the stability of  $\beta$ -catenin in these truncated-APC cells. Significant  $\beta$ -catenin protein degradation was detected at around the 2-hr time point after cycloheximide (Chx) treatment in WT cells, while  $\beta$ -catenin was stabilized in all CID-deleted mutants APC3–6, again with a gradual difference between the various mutants (Figure 1C). Immunofluorescent staining further illustrated the nuclear accumulation of the stabilized  $\beta$ -catenin in these mutants (Figure 1C). Of note, the CID-containing APC2 mutant showed moderate upregulation

of Wnt activity, yet without detectable nuclear accumulation of  $\beta$ -catenin.

We have previously shown that APC mutations in CRC cells abrogate Axin-bound  $\beta$ -catenin ubiquitination (Li et al., 2012). Here, we examined the  $\beta$ -catenin ubiquitination state by immunoprecipitating the endogenous destruction complex in our CRISPR-targeted APC mutants using AXIN1-specific antibody. Cells were pre-treated with MG132 for 4 hr, followed by endogenous Axin1 IP-coupled western blot analysis. This allows us to visualize the ubiquitinated forms of phosphorylated  $\beta$ -catenin in the Axin pull-down by mobility shift. Consistent with our previous data, suppression of  $\beta$ -catenin ubiquitination was observed in the APC mutants, as revealed by immunoblotting of phospho- $\beta$ -catenin (S33/S37/T41) antibody (Figure 1D) and phospho-insensitive total  $\beta$ -catenin antibody (Figure S1E). Specifically, we observed a reduction of  $\beta$ -catenin ubiquitination (mobility shift) upon the loss of CID (APC3), with almost-complete abrogation of ubiquitination in the APC4 and APC5 mutants (Figure 1D). Suppression of  $\beta$ -catenin ubiquitination upon APC truncation was further confirmed by co-expressing Myc-Ubiquitin and FLAG- $\beta$ -catenin, followed by sequential double IP in WT and APC4 cells (Figure S1F). Together, the data support the notion that CID is the pivotal domain of APC to inhibit Wnt signaling by regulating  $\beta$ -catenin ubiquitination.

A previous study proposed an alternative mechanism where APC mutation exposes the N-terminal serine/threonine residues of  $\beta$ -catenin to phosphatase for dephosphorylation (Su et al., 2008). To determine whether  $\beta$ -catenin phosphorylation is affected upon a single APC truncating mutation around the MCR, we examined GSK3-mediated (S33/S37/T41) and CK1-mediated (S45)  $\beta$ -catenin phosphorylation statuses in WT versus APC2–5 cells in the absence of MG132. In contrast to the previous finding (Su et al., 2008), our data showed robust accumulation of phosphorylated forms of  $\beta$ -catenin in APC3 and APC4 cells upon CID deletion, while phosphorylation was inhibited in APC5 cells (Figure S1G). The result suggests that  $\beta$ -catenin phosphorylation is only affected when all  $\beta$ -catenin binding motifs are lost in the APC protein (APC5), while phosphorylation is still intact in the CID-loss APC mutations at the MCR (APC3 and APC4). Our APC CRISPR mutant isogenic cells provide unique tools for direct quantitation of endogenous  $\beta$ -catenin phosphorylation for the first time in a single APC mutation event.

### Reciprocal Binding of $\beta$ -TrCP and USP7 to the $\beta$ -Catenin-Destruction Complex upon APC Truncation

We then asked how  $\beta$ -catenin ubiquitination is inhibited when APC is truncated. We hypothesized that CID regulates  $\beta$ -catenin

#### Figure 1. CID Is the Threshold for the Pathological Level of Wnt Activation

(A) Schematic representations of human WT APC protein and the corresponding truncating mutants generated by the CRISPR-Cas9 technique. Relative TOP/FOP luciferase activities were measured in different lines. Error bars represent  $\pm$  SE from at least three independent experiments (\*\*\*)  $p < 0.001$ .

(B) Cell lysates of HEK293T WT and APC truncated cell lines were analyzed by western blot using the indicated antibodies. GAPDH protein levels were used as loading control.

(C) Cells were treated with cycloheximide (Chx) (50  $\mu$ g/mL) and collected at different time points as indicated. Stimulated lysates were subjected to western blot analysis using the indicated antibodies. Immunostaining of  $\beta$ -catenin (green) was performed in the indicated cell lines using phospho-insensitive  $\beta$ -catenin antibody (BD Biosciences). Scale bar, 20  $\mu$ m.

(D) Different cell lysates were immunoprecipitated with AXIN1 antibody followed by western blot analysis using the indicated antibodies. IgG, immunoglobulin G. See also Figure S1.

ubiquitination by interacting with unknown ubiquitin-regulatory proteins. To identify novel CID-bound ubiquitin-regulatory proteins, we generated APC WT and CID-deleted ( $\Delta$ CID) expression constructs. To test their Wnt inhibitory roles, we expressed the constructs in the APC mutant SW480 CRC cells (amino acid [aa] 1338) and measured the Wnt transcriptional activity. TopFlash luciferase assay showed that expression of APC  $\Delta$ CID failed to suppress Wnt activation in SW480 cells as compared to APC WT (Figure 2A). IP-coupled western blot analysis further demonstrated that  $\beta$ -catenin ubiquitination was abolished in APC  $\Delta$ CID-expressing cells as revealed by mobility shift (Figures 2B and S2A).

To examine the compositional differences of the  $\beta$ -catenin destruction complex upon the loss of CID, WT and  $\Delta$ CID APCs were individually expressed in human HEK293T and mouse L cells for tandem affinity purification (TAP) followed by mass spectrometry (MS) analysis (Figure 2C). Intensity-based absolute quantification (iBAQ) was used for label-free quantification. Destruction complex components such as APC, AXIN1,  $\beta$ -catenin, and casein kinases were readily detected in the IP complexes. Protein candidates with differential interaction between APC WT versus  $\Delta$ CID in either cell line were shortlisted. To identify novel ubiquitin-regulatory proteins, we further shortlisted interactors that are either E3-ubiquitin ligases or DUBs. This resulted in seven protein candidates, among which only the DUB enzyme USP7 (ubiquitin-specific peptidase 7) was detected exclusively in the APC  $\Delta$ CID complex in both cell lines (Figures 2D and S2B).

Consistent with our MS data, we observed a significant increased binding of USP7 to the destruction complex in the CID-deleted APC mutants (APC3–5) as compared to the WT and the CID-containing APC2 cells (Figures 2E and 2F). Interestingly, an inverse interaction of the E3 ligase  $\beta$ -TrCP to the destruction complex was observed, where binding was significantly decreased in APC3–5 cells. We further confirmed such mutually exclusive presence of USP7 and  $\beta$ -TrCP in an independent experiment with different APC deletion constructs with or without CID (Figures S2C and S2D). Of note, dissociation of  $\beta$ -TrCP to the destruction complex was robust but not complete in the CID-deleted APC mutants (Figures 2B, 2E, S2A, and S2D).

Based on our current data, we speculate that APC CID may, indeed, function to protect  $\beta$ -catenin from binding to the DUB enzyme USP7 in the destruction complex. Deletion of CID will then expose  $\beta$ -catenin to USP7 for deubiquitination, leading to subsequent  $\beta$ -catenin accumulation and aberrant Wnt activation. To test this hypothesis, we co-expressed FLAG-tagged  $\beta$ -catenin and MYC-tagged USP7 in APC4 cells with or without additional CID expression.  $\beta$ -catenin was pulled down using FLAG antibody, and the binding of USP7 in the presence or absence of CID was examined. Consistent with our hypothesis, expression of CID, indeed, suppressed the binding of USP7 to  $\beta$ -catenin (Figure S2E). Together, our data suggest that the CID-loss APC mutation promotes  $\beta$ -catenin deubiquitination by (1) reduced binding of the E3 ligase  $\beta$ -TrCP from the destruction complex and (2) exposing  $\beta$ -catenin to the DUB enzyme USP7. This led us to hypothesize the direct interaction between USP7 and  $\beta$ -catenin proteins.

### USP7 Interacts with the N Terminus of $\beta$ -Catenin Directly to Mediate $\beta$ -Catenin Deubiquitination

Next, we characterized whether  $\beta$ -catenin is the substrate of USP7 for deubiquitination. We first confirmed the interaction between USP7 and  $\beta$ -catenin using endogenous IP in HEK293T cells (Figures 3A and 3B). The binding of USP7 to the Axin1 complex was significantly increased in APC4 mutant compared to WT HEK293T cells (Figure S3A). A previous study suggested that the interaction between USP7 and  $\beta$ -catenin was dependent on another E3 ligase RNF220 (Ma et al., 2014). To validate whether the binding of USP7 to the destruction complex requires RNF220, we performed endogenous IP in both HEK293T and APC mutated (APC4) cells using Axin1-specific antibody. In contrast to the reported data, we were unable to detect RNF220 in the endogenous Axin destruction complex (Figure S3A). To further confirm that the USP7 interaction is RNF220 independent, we CRISPR-targeted RNF220 in APC4 cells and repeated endogenous Axin1 IP (Figure S3B). USP7 was detected in the Axin1-pull-down complex in both RNF220-proficient and -deficient cells (Figure S3C). Our results imply that the increased binding of USP7 to the destruction complex upon APC mutation is RNF220 independent.

To map the USP7 binding site on  $\beta$ -catenin, we generated a  $\beta$ -catenin 26-mer overlapping peptide array with one residue offset. The array was then probed with USP7 recombinant protein or control to identify specific binding signal. Two potential USP7 binding sites were detected on the N terminus of  $\beta$ -catenin (Figure 3C). To validate the USP7 binding, we synthesized the two  $\beta$ -catenin peptides identified from the array with N-terminal biotin labeling for IP analysis. Our results confirmed the direct interaction of USP7 to the two identified  $\beta$ -catenin peptide regions (Figures 3D and S3D). Interestingly, the first peptide region (aas 28–53) covers the GSK3 (Ser33, Ser37, and Thr41) and CK1 (Ser45) phosphorylation sites, while the second region (aas 70–97) covers another reported modification site, Tyr86 (Tomimaga et al., 2008). Motif analysis confirmed a  $\beta$ -TrCP binding motif (aas 32–37; DSGIHS) and revealed a USP7 binding motif (aas 44–47; PSLS) in the first detected peptide (Figure 3E) (Sheng et al., 2006). To validate whether “PSLS” is the USP7 binding motif on  $\beta$ -catenin, we mutated the consensus serine residue (Ser47) on  $\beta$ -catenin (i.e., “PSLS” to “PSLA”) and examined the interaction with USP7. IP-coupled western blotting demonstrated a significantly weaker interaction between USP7 and  $\beta$ -catenin S47A mutant protein as compared to the wild-type  $\beta$ -catenin (Figures 3F and 3G). We further generated the  $\beta$ -catenin Y86A mutant to test the second putative USP7 binding region. Pull-down of  $\beta$ -catenin Y86A also showed a moderate decrease in binding to the USP7 protein (Figures S3E and S3F), although the decrease was not as significant as in the S47A mutant. Of note, the close proximity of both USP7 and the  $\beta$ -TrCP binding motif on the N terminus of  $\beta$ -catenin suggests a potential competition of substrate between the two enzymes.

Finally, we tested whether  $\beta$ -catenin is the direct substrate of USP7 by generating a catalytic inactive mutant of USP7 C223A (Hu et al., 2002). Expression of WT USP7 robustly suppressed  $\beta$ -catenin ubiquitination, as demonstrated by mobility shift, while the C223A mutant expression failed to execute its

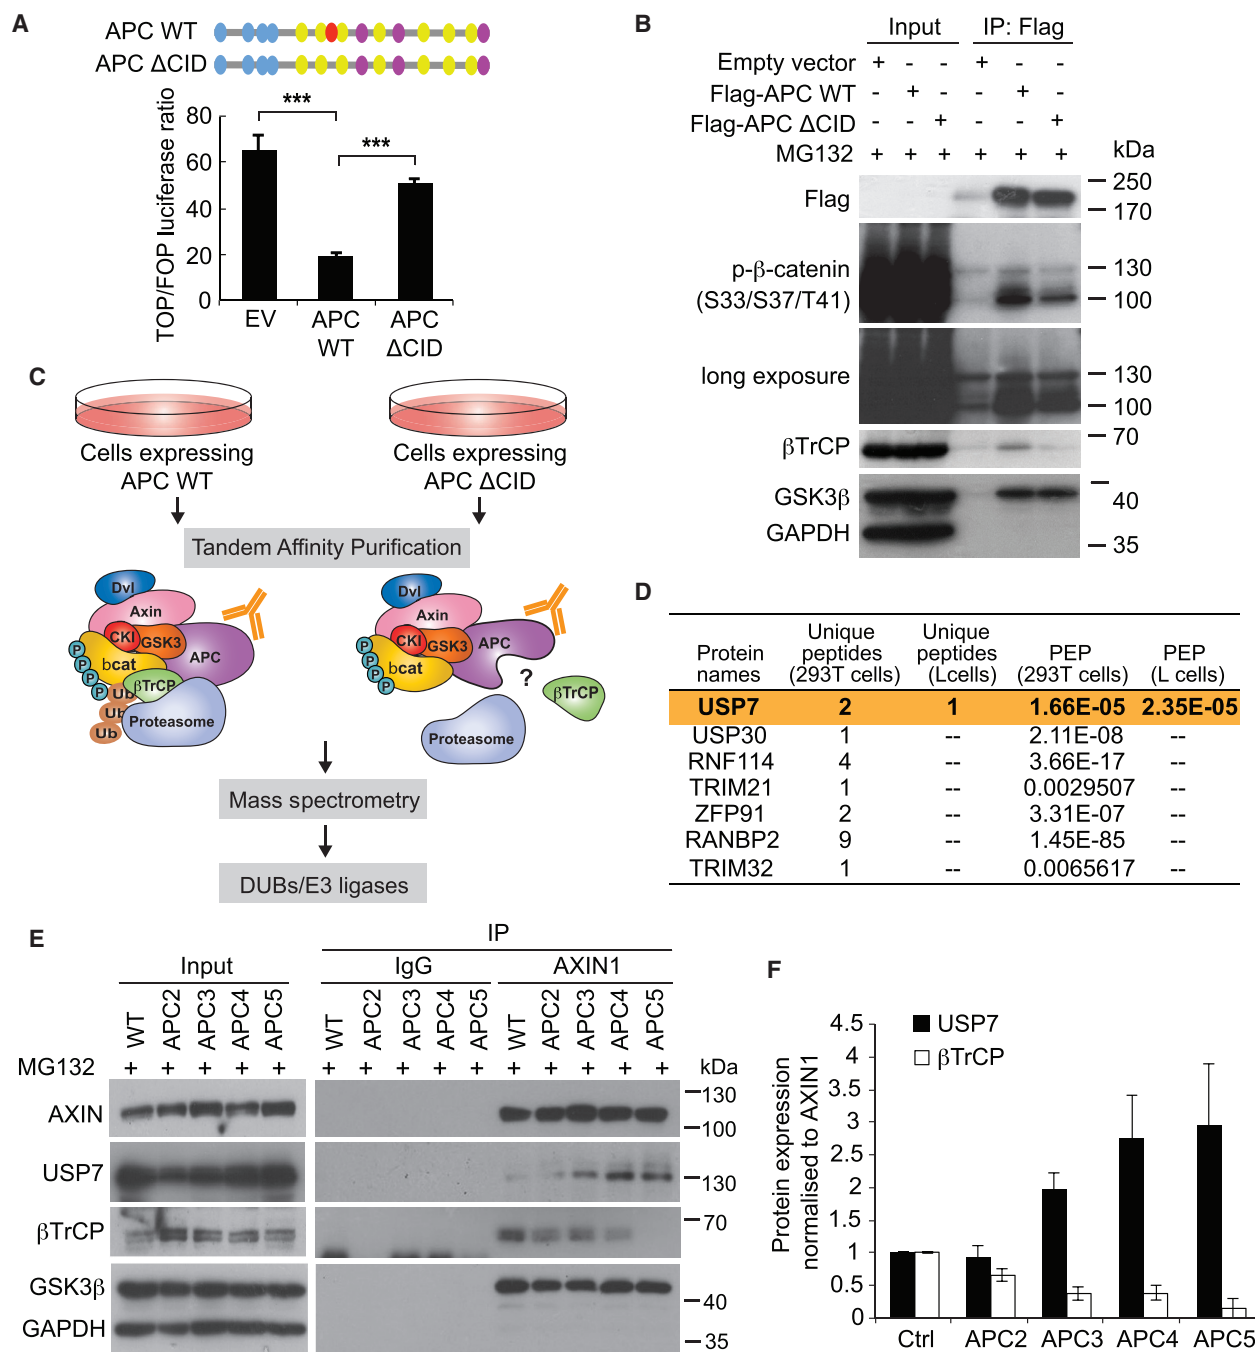

**Figure 2. Reciprocal Binding of  $\beta$ -TrCP and USP7 to the  $\beta$ -Catenin-Destruction Complex in APC-Truncated Cells**

(A) Schematic representation of the central region (1,265–2,060 aas) of APC (APC WT) and the CID-deleted mutant (APC  $\Delta$ CID). Relative TOP/FOP activities of the APC truncated cell line SW480 transfected with empty vector (EV), APC WT, or APC  $\Delta$ CID plasmids. Error bars represent SE from at least three independent experiments (\*\*\* $p$  < 0.001).

(B) HEK293T cells were transfected with EV, FLAG-tagged APC WT, or APC  $\Delta$ CID. Lysates were subjected to anti-FLAG IP followed by western blotting using the indicated antibodies.

(C) Schematic representation of the experimental procedure used for mass spectrometry analysis.

(D) DUBs and E3 ligases identified from mass spectrometry in HEK293T and L cells that showed differential bindings to WT versus  $\Delta$ CID complex. PEP, posterior error probability (p value for protein identification).

(E) Cell lysates were immunoprecipitated with AXIN1 antibody followed by western blotting using the indicated antibodies.

(F) Quantitation of USP7 and  $\beta$ -TrCP protein binding normalized to AXIN1 protein pulled down in (E).

See also Figure S2.

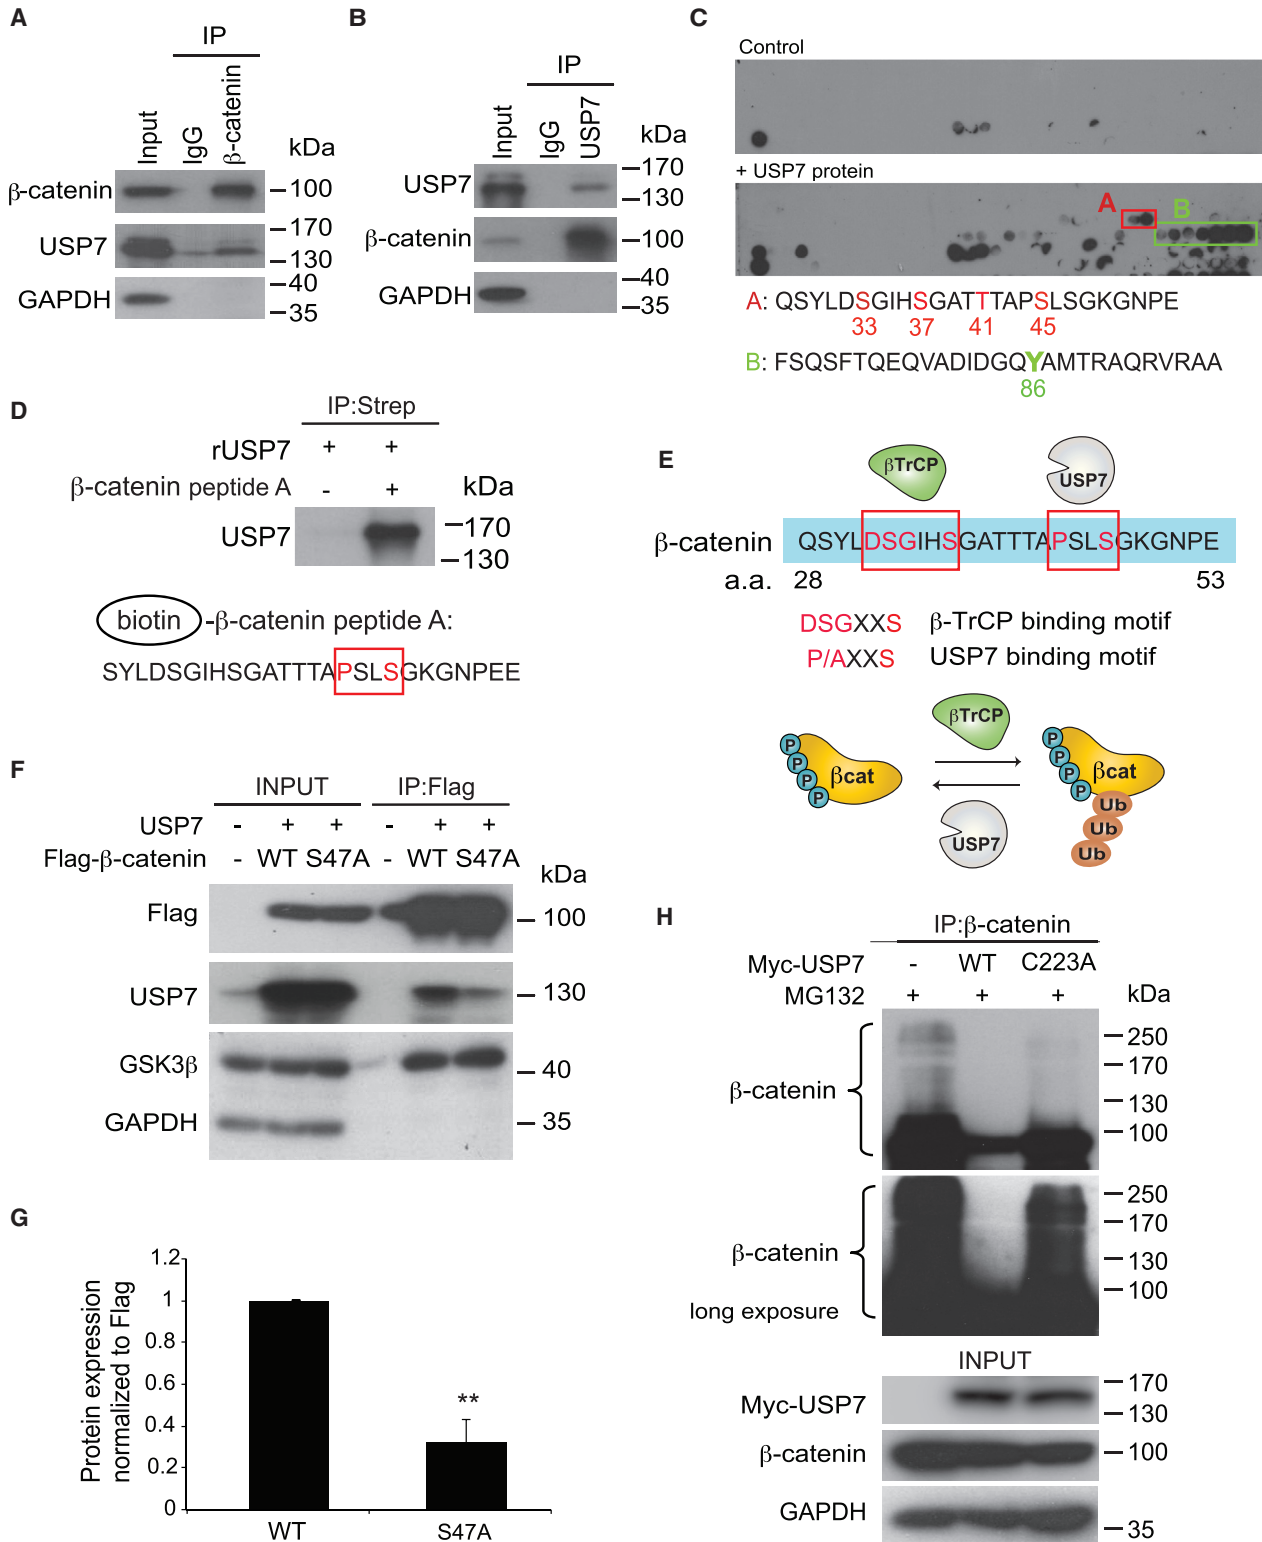

**Figure 3. USP7 Directly Interacts with the N Terminus of β-Catenin to Mediate β-Catenin Ubiquitination**

(A and B) IP of endogenous β-catenin (A) or USP7 (B) in HEK293T cells followed by western blotting using the indicated antibodies.

(C) A β-catenin 26-mer peptide array was probed with vehicle control or USP7 recombinant protein. Two USP7-specific binding regions were identified. Reported modification sites were indicated.

(legend continued on next page)

function (Figures 3H and S3G). An in vitro deubiquitination assay further confirmed that  $\beta$ -catenin is the direct substrate of USP7 (Figure S3H). Together, our data imply that USP7 interacts with the N terminus of  $\beta$ -catenin directly to mediate  $\beta$ -catenin deubiquitination when APC is mutated.

### USP7 Depletion in APC-Truncated CRC Cells Suppresses Aberrant Wnt Activation by Restoring $\beta$ -Catenin Ubiquitination

Our current data support a model in which APC truncation activates Wnt signaling by exposing the destruction-complex-bound  $\beta$ -catenin to the DUB enzyme USP7 for deubiquitination. To test whether this process is reversible, we depleted USP7 in the APC mutant cell line (APC4) using CRISPR/Cas9 gene targeting. Wnt activation of APC4 cells was significantly suppressed upon USP7 mutation (Figures 4A and S4A–S4C). Interestingly, we were not able to obtain stable knockout (KO) of USP7 efficiently in APC4 cells. Transient targeting of USP7 in APC4 cells immediately after transfection significantly suppressed Wnt transcriptional activity, while such suppression was gradually lost upon colony picking (Figure S4B). We reasoned that USP7 depletion in APC mutant cells might have a growth disadvantage and may, therefore, be rapidly replaced by USP7 WT cells upon passaging. Indeed, the USP7 targeted cells grew much more slowly than the non-targeted cells. USP7 has been previously described in the p53/Mdm2 pathway to regulate p53-dependent apoptosis (Li et al., 2002; Meulmeester et al., 2005). To prove that the USP7-mediated Wnt activation is p53 independent, we further targeted USP7 in the APC-mutated CRC cell line SW480 carrying the p53 mutation. Similar to the APC4 cells, we were not able to obtain complete USP7 KO in SW480 cells (Figure S4D). Transient targeting of USP7 in SW480 cells showed robust suppression of USP7 protein and Wnt activation, while the USP7-depleted cells were rapidly lost upon passaging and colony picking (Figures S4E and S4F). Despite the incomplete USP7 depletion, a significant suppression in Wnt signaling was observed using TopFlash luciferase and Wnt target gene transcription (Figures 4B and S4G). The results showed that USP7-mediated Wnt activation in CRC is a reversible process. The rapid loss of USP7-depleted cells suggests that USP7 might be essential for the survival of APC mutant cells.

To test whether USP7 is also important in physiological Wnt activation, we CRISPR targeted USP7 in WT HEK293T cells with intact APC and measured the TopFlash luciferase activity upon Wnt3A induction. In contrast to APC4 and SW480 cells, complete KO of USP7 could be generated easily in the WT

HEK293T cells (Figure S4H; Table S2). Surprisingly, we did not observe any changes in Wnt activation, despite the complete USP7 KO (Figure 4C). Our data suggest that USP7 is essential to sustain pathological Wnt activation in APC mutants but not physiological Wnt activation in normal cells.

We next tested whether USP7 depletion in APC-mutated cells was able to rescue  $\beta$ -catenin ubiquitination. Indeed, CRISPR targeting of USP7 in the CID-deleted APC4 cells readily restored  $\beta$ -catenin ubiquitination in the destruction complex (Figures 4D and S4I). To further demonstrate that the ubiquitination event is  $\beta$ -catenin specific, we co-transfected His-tagged ubiquitin and FLAG-tagged  $\beta$ -catenin in APC4 cells with or without USP7 depletion for double IP. Western blot analysis of the His pull-down samples showed significantly more ubiquitinated  $\beta$ -catenin in APC4 cells after USP7 depletion, as shown by the shift of higher molecular weight forms of  $\beta$ -catenin (Figure S4J). Consistent with our IP and TopFlash luciferase data,  $\beta$ -catenin protein degradation was significantly accelerated when USP7 was depleted in APC4 cells (Figures 4E and S4K). We concluded that USP7 is essential in mediating  $\beta$ -catenin deubiquitination and aberrant Wnt activation upon APC truncation.

Next, we examined whether USP7 deletion affects cell proliferation and survival. Clonogenic assays were performed in Caco2, SW480, APC4, and HEK293T cells with or without USP7 CRISPR targeting. Depletion of USP7 in Caco2, SW480, and APC4 cells significantly suppressed colony formation in comparison to the parental cells (Figures 4F and 4G). In contrast, USP7 KO in WT HEK293T cells did not show any effect on cell growth. To further validate that the growth suppression of USP7 depletion in APC mutants is, indeed, due to Wnt/ $\beta$ -catenin signaling, we introduced a stabilized form of  $\beta$ -catenin (Ser33Y mutant) in the APC4 and Caco2 cells upon USP7 CRISPR targeting.  $\beta$ -Catenin (Ser33Y) expression significantly rescued the number of colonies formed as well as the Wnt transcriptional activity mediated by USP7 CRISPR mutation in both cells (Figures 4H and S4L), suggesting that the growth defect upon USP7 loss is due to modulation of Wnt signaling. Our data support the notion that USP7 plays a crucial role in Wnt signal activation and cell survival, specifically in APC truncated cells.

To further test whether USP7 also regulates Wnt signaling in non-APC-mutated CRC, we depleted USP7 in another CRC cell line, HCT116, carrying WT APC and heterozygous  $\beta$ -catenin Ser45 deletion (Figure S4M). Similar to the WT HEK293T cells, CRISPR targeting of USP7 in HCT116 cells did not suppress Wnt activation (Figure 4I). We further interrogated the cell line by introducing an additional APC mutation using CRISPR

(D) Biotinylated  $\beta$ -catenin peptide A, including the putative USP7 binding motif (highlighted in the red box), was incubated with recombinant USP7 protein (rUSP7) followed by streptavidin-pull-down assays.

(E) Top: presence of  $\beta$ -TrCP and USP7 binding motif in the  $\beta$ -catenin peptide sequence aa 28–53. Conserved sequences are highlighted in red. Bottom: schematic representation of the regulation of  $\beta$ -catenin ubiquitination by  $\beta$ -TrCP and USP7. Phosphorylation sites indicated represent GSK3-mediated (Ser33, Ser37, and Thr41) and CK1-mediated Ser45 phosphorylation.

(F) USP7 showed reduced binding to the  $\beta$ -catenin S47A mutant IP complex compared to the WT.

(G) Quantitation of the amount of USP7 in the FLAG- $\beta$ -catenin complex after transfecting  $\beta$ -catenin WT and comparing with  $\beta$ -catenin S47A. Error bars represent SD from three independent experiments. \* $p < 0.05$ .

(H) Empty vector, MYC-USP7 WT, or MYC-USP7-C223A plasmids were transfected followed by endogenous  $\beta$ -catenin IP and immunoblotting using the indicated antibodies.

See also Figure S3.



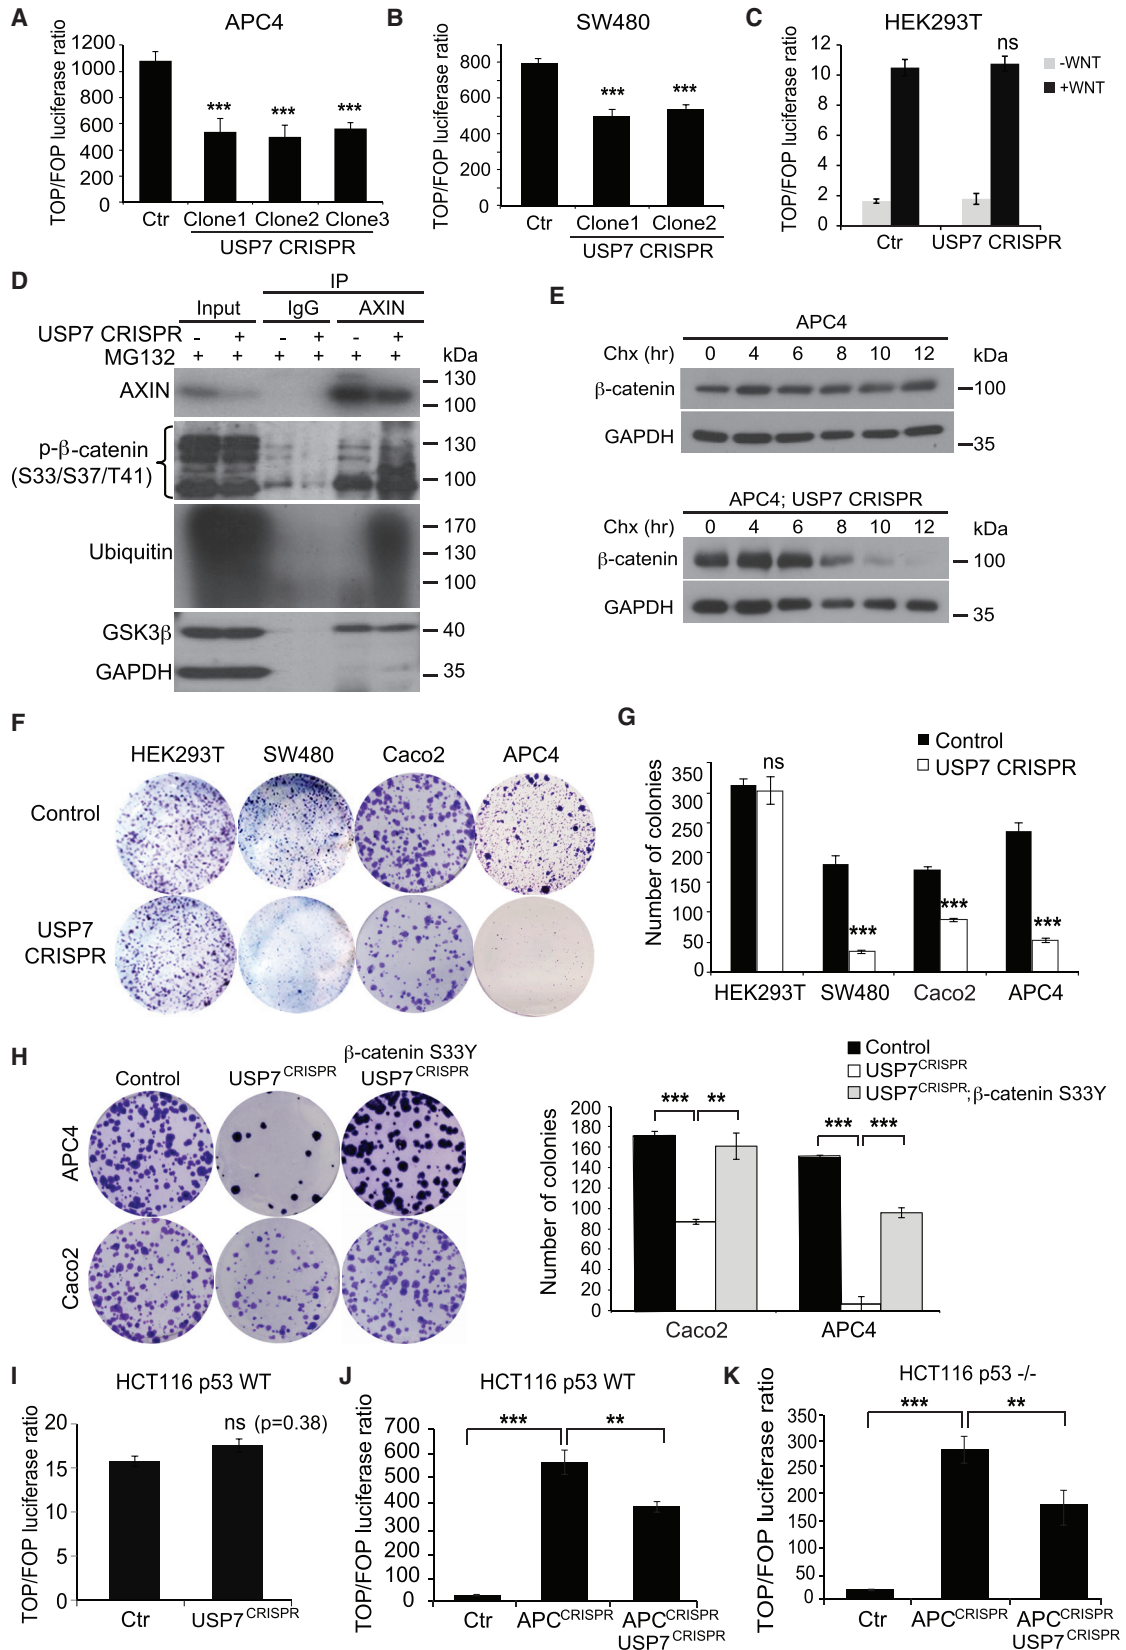

(legend on next page)

targeting (HCT116 APC<sup>CRISPR</sup>). Unlike the parental cell line, USP7 depletion in HCT116 APC<sup>CRISPR</sup> cells showed significant Wnt suppression (Figure 4J). We performed similar experiments in HCT116-p53 null cells and observed similar results (Figures 4K, S4N, and S4O). Of note, we were not able to obtain complete APC KO in the USP7-depleted HCT116 cells for the same growth disadvantage reason as that observed in APC4 and SW480 cells, confirming that USP7 is essential for cell survival in APC-mutated cells. Collectively, we concluded that the USP7-mediated  $\beta$ -catenin ubiquitination and Wnt activation are specific to CRCs carrying APC mutations and are p53 independent.

### Targeting USP7 with Small-Molecule Inhibitors Suppresses Wnt Activation in CRCs Carrying CID-Deleted APC Mutations

Our current data indicate that USP7 is a potential tumor-specific drug target for APC-mutated CRCs by altering the Wnt signaling pathway. Several USP7 inhibitors have been previously developed to target the p53/Mdm2 pathway, while their roles in the Wnt signaling pathway have not been addressed (Fan et al., 2013; Reverdy et al., 2012). Here, we examined the effect of the USP7-specific inhibitor HBX19818 on Wnt signaling in CRC cells (Reverdy et al., 2012). Treatment of the CRISPR-targeted APC4 cells with HBX19818 showed a marked reduction in Wnt activation (Figure 5A). Similar results were obtained in CRC cells carrying CID-deleted APC mutations (SW480 and Caco-2) (Figures 5B and 5C). Significant suppression of Wnt target gene transcription was also confirmed in APC4 after HBX19818 treatment (Figure 5D).

To validate whether the function of USP7 is specific to CID loss, we further examined the effect of HBX19818 on the different CRISPR-targeted isogenic APC mutants. Consistent with our hypothesis, Wnt signaling was significantly suppressed in the CID-deleted APC3 and APC5 cells but not in the CID-containing APC2 cells upon inhibitor treatment (Figures 5E–5G). Similarly, CRC cells carrying WT APC (HCT116) or CID partly containing APC mutation (DLD1) and WT HEK293T treated with HBX19818 did not suppress Wnt activation (Figures 5H, 5I, and S5A). A 3-(4,5-dimethylthiazol-2-yl)-2,5-diphenyltetrazolium bromidefor (MTT) assay further revealed that HBX19818-treated cells showed significantly reduced cell viability in the APC-truncated cells when compared to HEK293T cells (Figure 5J).

To validate the Wnt suppression effect, we further tested another reported USP7-specific inhibitor, P22077 (Fan et al.,

2013). Similar to HBX19818, P22077 treatment demonstrated a dose-dependent Wnt suppression in the APC-truncated APC4 and SW480 cells but not in the WT APC HEK293T or HCT116 cells (Figures S5B–S5E). Significant suppression of Wnt target gene transcription was also confirmed in APC4 cells after P22077 treatment (Figure S5F). An MTT assay further confirmed that P22077-treated cells significantly inhibited the cell viability of the APC-truncated cells as compared to HEK293T cells at the equivalent dose (Figure S5G).

In summary, USP7 inhibition by CRISPR targeting or treatment with two different small molecules consistently suppresses aberrant Wnt activation in CID-loss APC mutant cells. Our data highlight the potential of USP7 as a tumor-specific drug target for CRCs carrying CID-deleted APC mutations.

### Inactivation of Usp7 in Apc-Mutated Intestinal Organoids Promotes Differentiation and Suppresses Growth

Next, we studied the functional significance of Usp7 in ex vivo intestinal organoid culture (Sato et al., 2009). We first engineered different APC truncations in organoids using the CRISPR/Cas9 technique and compared their growth upon functional selection (Figure 6A; Table S3). Organoids derived from tumors isolated from Apc<sup>min/+</sup> mice were used as positive controls (Sato et al., 2011). Normal intestinal organoids that are cultured in a previously described medium (ENR) will form a budding structure with multi-lineage differentiation, while organoids with Apc depletion will turn into tumor-like “spheroids” that are hyperproliferative and extracellular Wnt signal independent and that lack differentiation (Dow et al., 2015; Drost et al., 2015). Similar to the Apc<sup>min/+</sup> organoids, all three engineered Apc mutant organoids showed spheroid morphology (Figure 6B, top panel). We asked whether our engineered Apc mutant organoids are dependent on exogenous Wnt signal by R-spondin withdrawal (Schwank et al., 2013) or treatment with porcupine inhibitor (which blocks Wnt ligand secretion) (Chen et al., 2009). Both WT and CID-containing Apc2 organoids died after exogenous Wnt depletion, whereas the CID-deleted Apc3, Apc5, and Apc<sup>min/+</sup> organoids could be maintained as spheroids in the culture (Figure 6B). Taken together with our CRISPR-engineered cell line data, the results support the notion that CID is the critical threshold in APC for the pathological level of Wnt activation and tumor transformation.

To determine whether Usp7 is essential in maintaining tumor-like spheroid growth in Apc-mutant organoids, we deleted Usp7 in Apc5 organoids by CRISPR targeting. Usp7 depletion

#### Figure 4. USP7 Depletion in APC-Truncated CRC Suppresses Wnt Activation by Restoring $\beta$ -Catenin Ubiquitination

(A–C) Relative TOP/FOP activities of the APC4 (A), SW480 (B), and HEK293T (C) cells with control or USP7 CRISPR targeting. (D) AXIN1 complexes were immunoprecipitated in APC4 cells with or without USP7 targeting followed by western blotting using the indicated antibodies. (E) Cells were treated with cycloheximide (Chx) (50  $\mu$ g/ $\mu$ L), and lysates were collected at different time points as indicated for immunoblotting of ABC (active  $\beta$ -catenin) and control GAPDH. (F) Colony formation assay in parental HEK293T, SW480, Caco2, and APC4 cells and the corresponding USP7 CRISPR-deleted cells. (G) Quantitation of number of colonies in (F). Experiments were performed in triplicates. (H) Colony formation assay of APC4 and Caco2 cells upon transient transfection of USP7 CRISPR and/or  $\beta$ -catenin S33Y mutant plasmids. The corresponding quantitation is indicated on the right. (I–K) Relative TOP/FOP activities of the HCT116 p53 WT (I and J) and HCT116 p53<sup>-/-</sup> (K) cells with indicated CRISPR targeting. Error bars represent SE from at least three independent experiments (\*\*p < 0.01; \*\*\*p < 0.001; ns, not significant). See also Figure S4.

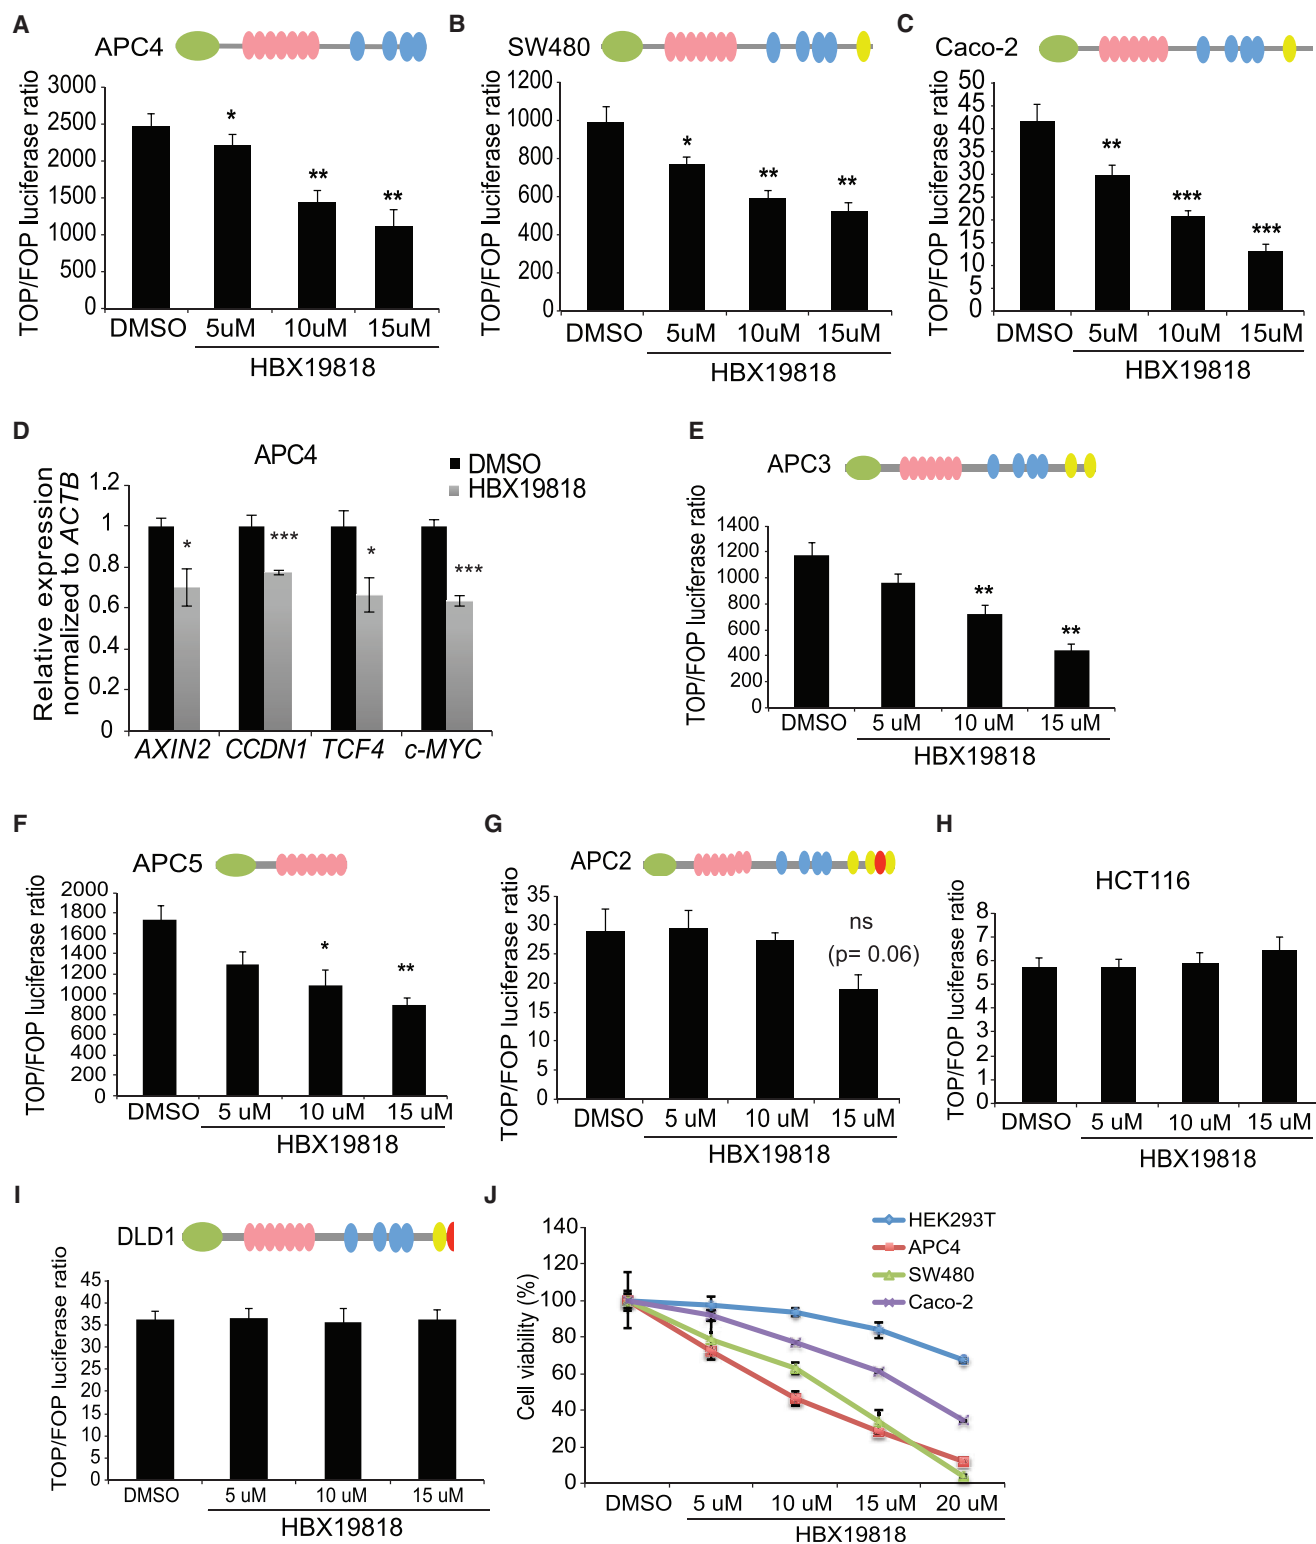

**Figure 5. USP7 Inhibitor Treatment Suppresses Wnt Activation in CID-Deleted APC Mutant CRCs**

(A–C) Relative TOP/FOP activities of APC4 (A), SW480 (B), and Caco-2 (C) cells treated with HBX19818 at the indicated concentrations or DMSO as control. (D) mRNA expression of the indicated Wnt target genes was analyzed by qRT-PCR in APC4 cells. Data are presented as fold change normalized to  $\beta$ -actin control in triplicate and are representative of at least three independent experiments.

(legend continued on next page)

prominently reversed the spheroid phenotype in *Apc5* that showed recovery of organoid sprouting—evidence of normal differentiation (Figures 6C, 6D, and S6A; Table S3). Wnt signaling was also significantly suppressed upon *Usp7* mutation (Figure S6B). Similar to the cell line data, we were not able to maintain *Usp7* KO in *Apc5* organoids. Indeed, the *Usp7* KO-induced sprouting phenotype was rapidly lost upon passaging, suggesting the growth disadvantage of these cells upon *Usp7* loss (Figure S6C). Despite the incomplete KO, inhibition of *Usp7* in *Apc5* organoids resulted in significant growth suppression (Figures 6E, S6D, and S6E) and cellular differentiation (Figures 6F and S6F). Importantly, CRISPR-targeted *Usp7* mutation in WT organoids did not show any significant effect, which is consistent with the tumor-specific role we observed in CRC cell lines (Figures S6G and S6H; Table S3). Together, our data suggest that USP7 can be used as a tumor-specific therapeutic target to suppress tumor growth and induce cellular differentiation via Wnt inactivation.

### USP7 Depletion Significantly Inhibits APC-Mutated CRC Tumor Growth In Vivo

To confirm the therapeutic role of USP7 in CRC, we further studied the effect of USP7 inhibition in vivo using a xenograft model. Colon cancer SW480 cells were injected subcutaneously into the flank of SCID mice. USP7 inhibitor P22077 or vehicle control (DMSO) was administered at 30 mg/kg daily by intraperitoneal injections (Fan et al., 2013). Treatment of the mice with P22077 significantly suppressed tumor growth compared to vehicle treatment (Figures 7A and 7B). Mice treated with P22077 did not show any detectable health problems or weight loss (Figure S7A). Histological analysis of the intestine from the P22077-treated mice also showed no significant difference compared to the control animals (Figure S7B). In addition, tumor material isolated from the P22077-treated mice showed suppression of Wnt target genes (Figure S7C). The data suggest that USP7 inhibitors can be used for treatment of APC-mutated CRC by suppressing pathological Wnt activation.

To validate the tumor-suppressive effect of USP7 inhibitors, we repeated the xenograft experiment by comparing tumor growth between the parental and USP7 CRISPR-targeted SW480 cells (Figure S7D). Consistent with the inhibitor data, USP7 depletion significantly inhibited tumor growth, compared to the parental SW480 tumors (Figures 7C and 7D) with reduced Wnt target gene expression (Figure S7E).

We further tested whether the tumor-suppressive effect is p53 dependent by comparing the effect of *Usp7* depletion in our CRISPR-engineered HCT116 cell line carrying an additional APC mutation (HCT116 APC<sup>CRISPR</sup>) in both p53 WT and null backgrounds. Strikingly, the HCT116 APC<sup>CRISPR</sup> USP7<sup>CRISPR</sup> cells demonstrated remarkable suppression in tumor growth when compared to the HCT116 APC<sup>CRISPR</sup> cells (Figures 7E

and 7F). To confirm that the USP7-mediated tumor suppression is p53 independent, we compared the xenograft tumor growth between HCT116 p53<sup>-/-</sup> APC<sup>CRISPR</sup> and HCT116 p53<sup>-/-</sup> APC<sup>CRISPR</sup> USP7<sup>CRISPR</sup> cells. Consistently, USP7 depletion dramatically suppressed tumor growth in the HCT116 p53<sup>-/-</sup> background (Figures 7G and 7H). In summary, our findings suggest that USP7 is a promising tumor-specific target for treatment of APC-mutated CRC by targeting pathological Wnt activation.

## DISCUSSION

The connection between the Wnt signaling pathway and CRC was first identified in the early 1990s. Both somatic and germline mutations of APC were discovered in CRC patients in 1991 (Groden et al., 1991; Joslyn et al., 1991; Kinzler et al., 1991; Nishisho et al., 1991), while the interaction between APC and  $\beta$ -catenin was found 2 years after (Rubinfeld et al., 1993; Su et al., 1993). Despite extensive research on Wnt signaling and CRC over the past 20 years, clinically approved drugs targeting Wnt signaling in APC mutation cancer do not exist. The major hurdle of therapeutic development of Wnt pathway inhibitors rests in its essential role in adult tissue homeostasis. Drugging Wnt signaling will inevitably cause toxicity to Wnt-dependent normal tissue development such as in the intestine, thus limiting the full antitumor efficacy. Development of tumor-specific Wnt inhibitor would circumvent this challenge.

In this study, we identified USP7 as a tumor-specific target by characterizing the fundamental Wnt-activating mechanism of APC mutation. Most previous studies on APC and the Wnt pathway relied heavily on ectopic overexpression of various APC mutant proteins in non-physiological doses. None of these experiments can faithfully recapitulate the endogenous molecular changes upon a single, specific APC mutation in a mammalian cell. Here, we engineered various endogenous APC truncations in WT isogenic cell lines and intestinal organoids using CRISPR/Cas9 genome editing and revealed the functional significance of the CID domain in APC as the critical threshold for pathological Wnt activation and tumor formation. Our data show that CID-lacking APC truncation results in Wnt pathway activation by facilitating binding of the DUB enzyme USP7—at the cost of binding of the E3 ligase  $\beta$ -TrCP—to the destruction complex for  $\beta$ -catenin deubiquitination. Inactivation of USP7, either by CRISPR mutation or by small-molecule inhibitors, suppresses APC-mutated CRC tumor growth and Wnt activation by restoring  $\beta$ -catenin ubiquitination. Importantly, USP7 inhibition does not affect normal cells with WT APC, indicating that USP7 can be used as a tumor-specific drug target for APC-mutated CRCs. Additional in vivo experiments using USP7 floxed mice in combination with an *Apc*-mutated tumor model will be crucial to confirm the tumor-suppressive effect upon USP7 depletion in the intestine. Our current data further imply a critical role of APC CID in

(E–I) Relative TOP/FOP activities of APC3 (E), APC5 (F), APC2 (G), HCT116 (H), and DLD1 (I) cells treated with DMSO or HBX19818 at the indicated concentrations.

(J) MTT assay in the indicated cell lines treated with DMSO or HBX19818 at the indicated concentrations for 24 hr.

Error bars represent  $\pm$  SE from at least three independent experiments (\* $p$  < 0.05; \*\* $p$  < 0.01; \*\*\* $p$  < 0.001; ns, not significant). See also Figure S5.

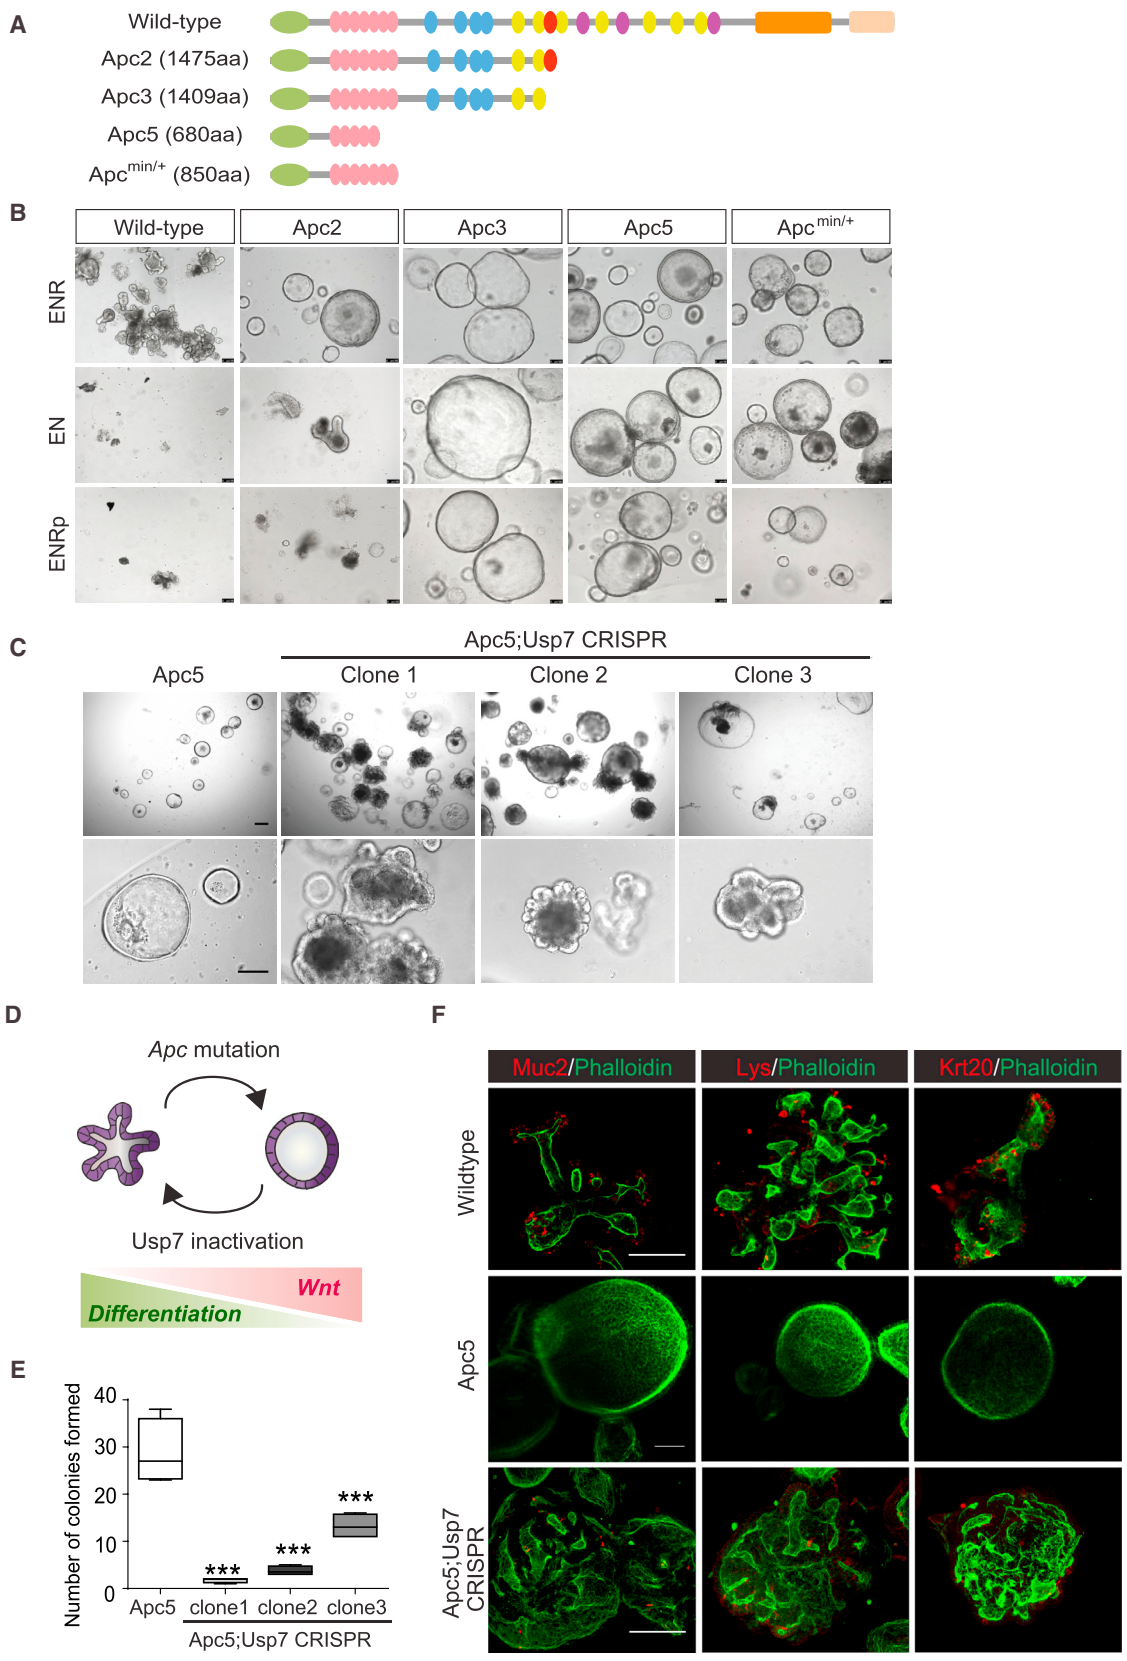

(legend on next page)

regulating  $\beta$ -catenin ubiquitination by protecting  $\beta$ -catenin from interacting with the DUB enzyme USP7. Ubiquitination of other proteins in the destruction complex, such as AXIN and APC, has been previously reported (Tran et al., 2013; Zhang et al., 2011). It would be interesting to further examine whether USP7 can target other proteins in the destruction complex apart from  $\beta$ -catenin.

Thus far, only two studies have attempted to examine the role of USP7 in Wnt signaling. The first study showed that USP7 is not involved in Wnt signaling based on short hairpin RNA (shRNA) screening in HEK293T cells (Tauriello and Maurice, 2010). Another group recently proposed, using a small interfering RNA (siRNA) knockdown strategy, that USP7 enhances Wnt signaling through RNF220-dependent  $\beta$ -catenin deubiquitination (Ma et al., 2014), which is inconsistent with our current findings. In fact, our data are consistent with the previous finding that USP7 depletion does not affect physiological Wnt activation. We show that USP7-mediated  $\beta$ -catenin deubiquitination is a tumor-specific event when APC is truncated and that it is RNF220 independent. Our data not only clarify the tumor-specific role of USP7 in Wnt signaling but also highlight the importance of developing physiological experimental models such as CRISPR-engineered mutations for molecular and functional studies. Of note, our current data do not completely exclude the role of USP7 in physiological Wnt regulation. In fact, recent studies have reported the roles of other DUB enzymes such as CYLD, USP47, and USP6 in physiological Wnt regulation (Madan et al., 2016; Shi et al., 2015; Tauriello and Maurice, 2010). It is, therefore, possible that USP7 inhibition alone does not affect physiological Wnt signaling due to redundancy. Further investigation will be needed to delineate the potential unique or redundant roles of these DUB enzymes in physiological and pathological Wnt regulation.

Previous studies have identified other proteins as potential substrates of the DUB enzyme USP7 (Nicholson and Suresh Kumar, 2011). The tumor suppressor gene p53 was first identified as the primary substrate of USP7 for deubiquitination and stabilization (Li et al., 2002). Subsequent studies further described the USP7-mediated deubiquitination of the E3 ligases of p53, Mdm2/HDM2 (the human ortholog of Mdm2), and its homolog HDMX, suggesting a dynamic role of USP7 in regulating the p53/Mdm2 pathway (Li et al., 2004; Meulmeester et al., 2005). To address whether the Wnt-activating role of USP7 is p53 dependent, we tested CRC cells with the p53 mutation (SW480 and HCT116 p53<sup>-/-</sup>). Our results clearly demonstrated that USP7-mediated  $\beta$ -catenin deubiquitination is p53 independent. We confirmed that targeting USP7 can suppress tumor growth

in vivo by inhibiting Wnt activation. To our knowledge, this is the first intervention against USP7 in CRC in vivo in the context of the Wnt signaling pathway.

Given the critical role in regulating both p53/Mdm2 and Wnt/ $\beta$ -catenin signaling, USP7 holds great promise as a therapeutic target for cancer treatment. Our current findings have added significant implications to the development and application of USP7 inhibitors in the clinic. The fact that we were not able to obtain complete USP7 KO in APC-mutated CRC cells indicates the essential role of USP7 in cancer cell survival. On the other hand, incomplete KO of USP7 was sufficient to inhibit Wnt signaling and suppress tumor growth. Our data echo a recent study showing that minimal APC restoration is sufficient for tumor suppression (Dow et al., 2015). This further implies a promising safe and efficient therapeutic window of USP7 inhibitors for cancer treatment. Identifying the target population is a critical step for developing a successful drug with high efficacy. Our data suggest that USP7 inhibitors can be used for treatment of CID-deleted APC mutated CRCs, as well as for potential preventive therapy for FAP patients carrying germline APC mutations, by delaying cancer onset. Since the Wnt-activating role of USP7 is tumor specific and p53 independent, drugs targeting USP7 can potentially be used to treat CRC patients with APC mutations, regardless of p53 status. However, we believe that USP7 inhibitor treatment will be more effective in patients carrying the APC mutation and WT p53 due to the synergistic effect of Wnt signal suppression and p53 stabilization. Further studies on the structural interaction between USP7 and  $\beta$ -catenin, as well as the conformational changes of the APC protein upon the CID loss, may aid the development of improved Wnt-specific USP7 inhibitors.

## EXPERIMENTAL PROCEDURES

### Cell Culture, Transfection, and TOPFlash Assay

HEK293T, SW480, DLD1, HCT116, and Caco-2 cells were maintained in DMEM GlutaMAX (GIBCO) supplemented with 5% fetal bovine serum (FBS) (GIBCO) and with 100 U/mL penicillin (GIBCO) and 100  $\mu$ g/mL streptomycin (GIBCO). All cells were maintained at 37°C in an incubator with 5% CO<sub>2</sub>. Cells were seeded in plates 24 hr before transfection, and plasmids were transfected using polyethylenimine (Polysciences) according to the manufacturer's instructions. For the TOPFlash luciferase assay, cells in a 48-well plate were transfected with 100 ng of the reporter plasmid TOP or FOP and 10 ng of TK/Renilla for each well. 100 ng of additional plasmid was cotransfected in each well when indicated. After 16 hr of transfection, cells were treated with Wnt3a-conditioned medium (when indicated) or control medium or with USP7 inhibitor treatment or DMSO for an additional 18 hr. The luciferase activity was measured using a luminometer. For transfections for IP, cells were also seeded 24 hr before transfection in a 10- or 15-cm plate, and 7–15  $\mu$ g plasmid

### Figure 6. *Usp7* Deletion in *Apc*-Mutated Intestinal Organoids Induces Differentiation and Suppresses Growth

- (A) Schematic representation of the mouse WT *Apc* protein and the corresponding truncating mutants generated by the CRISPR-Cas9 technique.  
 (B) Morphological changes of organoids cultured in the indicated conditions. E, Egf; N, Noggin; R, R-spondin; p, porcine inhibitor (IWP2). Scale bars, 100  $\mu$ m.  
 (C) Representative images of *Apc5* organoids with or without *Usp7* CRISPR targeting. Scale bars, 100  $\mu$ m.  
 (D) Schematic representation of the changes on the morphology of intestinal organoids upon *Apc* loss and *Usp7* inactivation.  
 (E) Clonogenic assay of *Apc5* organoids with or without *Usp7* CRISPR targeting after 7 days in culture. Error bars represent SE from at least three independent experiments (\*\*p < 0.001). Scale bar, 100  $\mu$ m.  
 (F) Immunofluorescent staining of WT, *Apc5*, and *Apc5;Usp7* CRISPR-targeted organoids using the indicated antibodies. Red signal shows markers of differentiation, including *Mucin2* (Muc2), *Lysozyme* (Lys), and *Keratin20* (Krt20). Scale bars, 100  $\mu$ m.  
 See also Figure S6.

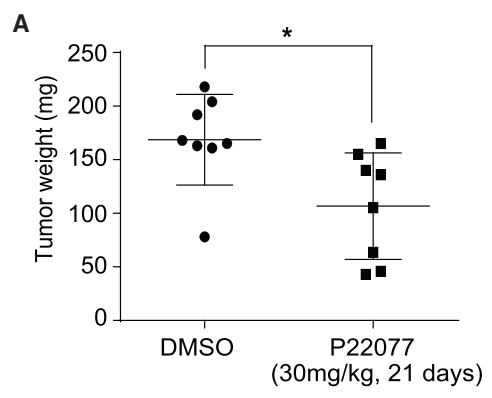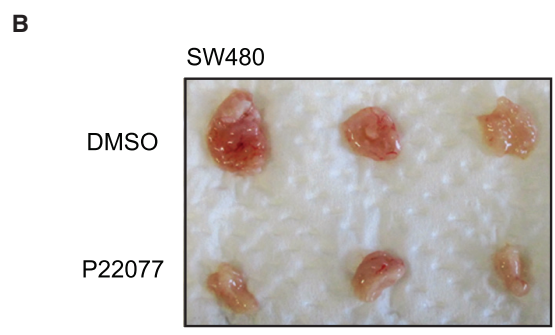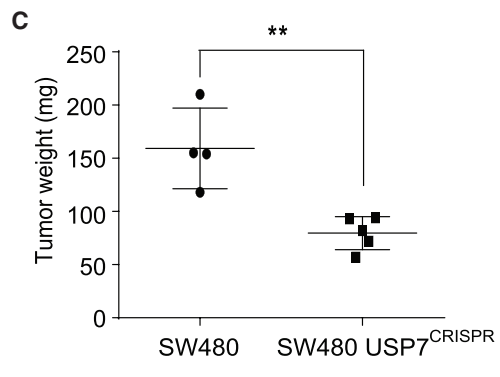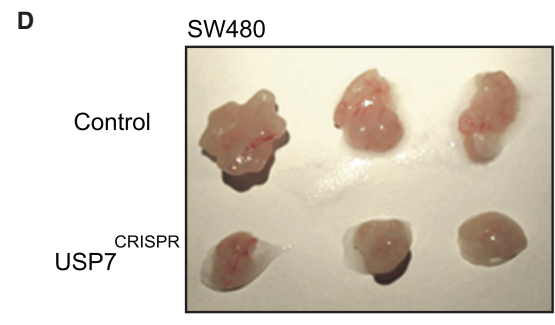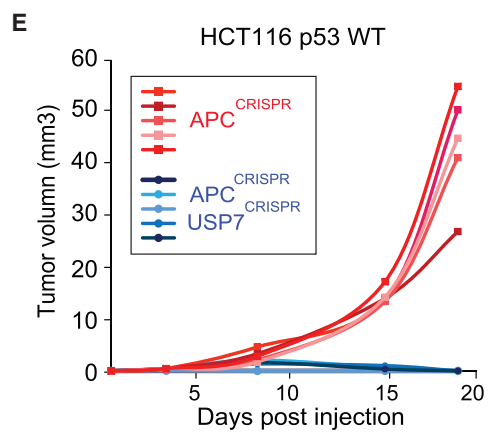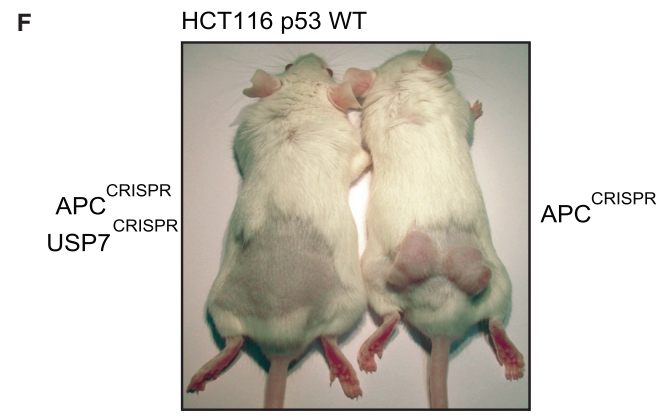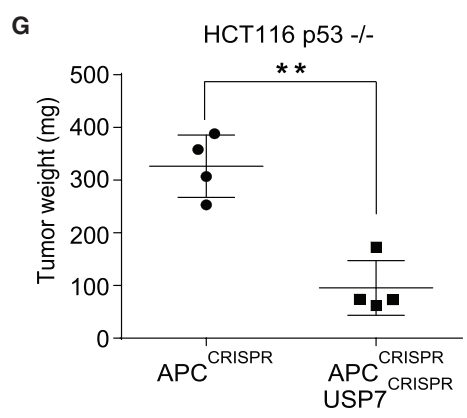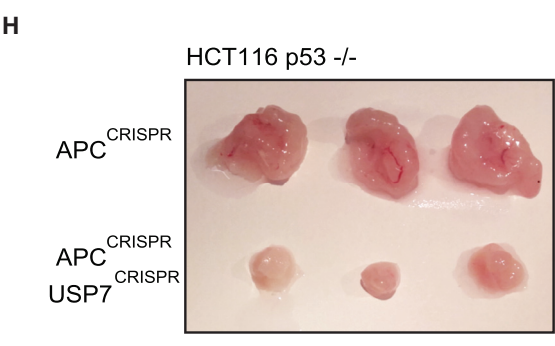

(legend on next page)

was transfected in each plate dependent on each plasmid. 48 hr after transfection, cells were lysed.

#### IP and Immunoblotting

Cells were pre-treated with 10  $\mu$ M MG132 proteasome inhibitor for 4 hr prior to lysate collection for all IP experiments. Cells were washed and collected with cold PBS and lysed in cold lysis buffer as previously described (Li et al., 2012).

#### Animal Procedures

All animal-regulated procedures were carried out according to Project License constraints and Home Office guidelines and regulations.

See the [Supplemental Experimental Procedures](#) for additional methods.

#### DATA AND SOFTWARE AVAILABILITY

Mass spectrometry data reported in this paper have been deposited in the ProteomeXchange Consortium via the PRIDE partner repository with the dataset identifier ProteomeXchange: PXD007947.

#### SUPPLEMENTAL INFORMATION

Supplemental Information includes Supplemental Experimental Procedures, seven figures, and three tables and can be found with this article online at <https://doi.org/10.1016/j.celrep.2017.09.072>.

#### AUTHOR CONTRIBUTIONS

L.N. and V.S.W.L. designed the experiments and analyzed the data. L.N., V.F., L.C., P.A., A.K., V.E., and A.P.S. conducted the experiments. L.N. and V.S.W.L. wrote the paper.

#### ACKNOWLEDGMENTS

We thank Hans Clevers for providing AXIN1-specific antibody and Christina Christopoulou for technical assistance. We also thank the Peptide Chemistry and the Biological Research Facility and the Experimental Histopathology Laboratory at the Francis Crick Institute for providing reagent and processing of samples. This work was supported by the Francis Crick Institute, which receives its core funding from Cancer Research UK (FC001105), the UK Medical Research Council (FC001105), and the Wellcome Trust (FC001105).

Received: May 19, 2016

Revised: September 1, 2017

Accepted: September 21, 2017

Published: October 17, 2017

#### REFERENCES

Aberle, H., Bauer, A., Stappert, J., Kispert, A., and Kemler, R. (1997). beta-catenin is a target for the ubiquitin-proteasome pathway. *EMBO J.* *16*, 3797–3804.

The Cancer Genome Atlas Network (2012). Comprehensive molecular characterization of human colon and rectal cancer. *Nature* *487*, 330–337.

Chen, B., Dodge, M.E., Tang, W., Lu, J., Ma, Z., Fan, C.W., Wei, S., Hao, W., Kilgore, J., Williams, N.S., et al. (2009). Small molecule-mediated disruption of Wnt-dependent signaling in tissue regeneration and cancer. *Nat. Chem. Biol.* *5*, 100–107.

Choi, S.H., Estarás, C., Moresco, J.J., Yates, J.R., 3rd, and Jones, K.A. (2013).  $\alpha$ -Catenin interacts with APC to regulate  $\beta$ -catenin proteolysis and transcriptional repression of Wnt target genes. *Genes Dev.* *27*, 2473–2488.

Clevers, H., and Nusse, R. (2012). Wnt/ $\beta$ -catenin signaling and disease. *Cell* *149*, 1192–1205.

Dihlmann, S., Gebert, J., Siermann, A., Herfarth, C., and von Knebel Doeberitz, M. (1999). Dominant negative effect of the APC1309 mutation: a possible explanation for genotype-phenotype correlations in familial adenomatous polyposis. *Cancer Res.* *59*, 1857–1860.

Dow, L.E., O'Rourke, K.P., Simon, J., Tschaharganeh, D.F., van Es, J.H., Clevers, H., and Lowe, S.W. (2015). Apc restoration promotes cellular differentiation and reestablishes crypt homeostasis in colorectal cancer. *Cell* *161*, 1539–1552.

Drost, J., van Jaarsveld, R.H., Ponsioen, B., Zimmerlin, C., van Boxtel, R., Buijs, A., Sachs, N., Overmeer, R.M., Offerhaus, G.J., Begthel, H., et al. (2015). Sequential cancer mutations in cultured human intestinal stem cells. *Nature* *521*, 43–47.

Fan, Y.H., Cheng, J., Vasudevan, S.A., Dou, J., Zhang, H., Patel, R.H., Ma, I.T., Rojas, Y., Zhao, Y., Yu, Y., et al. (2013). USP7 inhibitor P22077 inhibits neuroblastoma growth via inducing p53-mediated apoptosis. *Cell Death Dis.* *4*, e867.

Gaspar, C., and Fodde, R. (2004). APC dosage effects in tumorigenesis and stem cell differentiation. *Int. J. Dev. Biol.* *48*, 377–386.

Groden, J., Thliveris, A., Samowitz, W., Carlson, M., Gelbert, L., Albertsen, H., Joslyn, G., Stevens, J., Spirio, L., Robertson, M., et al. (1991). Identification and characterization of the familial adenomatous polyposis coli gene. *Cell* *66*, 589–600.

Hu, M., Li, P., Li, M., Li, W., Yao, T., Wu, J.W., Gu, W., Cohen, R.E., and Shi, Y. (2002). Crystal structure of a UBP-family deubiquitinating enzyme in isolation and in complex with ubiquitin aldehyde. *Cell* *111*, 1041–1054.

Joslyn, G., Carlson, M., Thliveris, A., Albertsen, H., Gelbert, L., Samowitz, W., Groden, J., Stevens, J., Spirio, L., Robertson, M., et al. (1991). Identification of deletion mutations and three new genes at the familial polyposis locus. *Cell* *66*, 601–613.

Kinzler, K.W., Nilbert, M.C., Su, L.K., Vogelstein, B., Bryan, T.M., Levy, D.B., Smith, K.J., Preisinger, A.C., Hedge, P., McKechnie, D., et al. (1991). Identification of FAP locus genes from chromosome 5q21. *Science* *253*, 661–665.

Kitagawa, M., Hatakeyama, S., Shirane, M., Matsumoto, M., Ishida, N., Hattori, K., Nakamichi, I., Kikuchi, A., Nakayama, K., and Nakayama, K. (1999). An F-box protein, FWD1, mediates ubiquitin-dependent proteolysis of beta-catenin. *EMBO J.* *18*, 2401–2410.

Kohler, E.M., Chandra, S.H., Behrens, J., and Schneikert, J. (2009). Beta-catenin degradation mediated by the CID domain of APC provides a model for the

#### Figure 7. USP7 Inactivation Suppresses APC-Mutated Colorectal Cancer Tumor Growth In Vivo

(A) SW480-derived tumor weights between DMSO control group and P22077 treatment group (30 mg/kg) at the end of treatment (21 days) (\*p < 0.05) (n = 8 per condition).

(B) Representative photos of SW480-derived tumors at the end of treatment.

(C) Comparison of weights between parental SW480- and SW480 USP7 CRISPR-derived tumors at the end of treatment (25 days) (\*\*p < 0.01) (n = 4 and n = 5, respectively).

(D) Representative photos of SW480 and SW480 USP7 CRISPR-derived tumors at the end of treatment.

(E) Tumor volumes derived from HCT116 APC<sup>CRISPR</sup> compared to HCT116 APC<sup>CRISPR</sup> USP7<sup>CRISPR</sup> throughout the experiment (19 days) (n = 5 per condition).

(F) Representative photos of the mice injected with HCT116 APC<sup>CRISPR</sup> cells compared to HCT116 APC<sup>CRISPR</sup> USP7<sup>CRISPR</sup> cells at the end of the experiment.

(G) Weight comparison between HCT116 p53<sup>-/-</sup> APC<sup>CRISPR</sup> and HCT116 p53<sup>-/-</sup> APC<sup>CRISPR</sup> USP7<sup>CRISPR</sup>-derived tumors at the end of the experiment (13 days) (n = 4 per condition; \*\*p < 0.01).

(H) Representative photos of the tumors derived from HCT116 p53<sup>-/-</sup> APC<sup>CRISPR</sup> and HCT116 p53<sup>-/-</sup> APC<sup>CRISPR</sup> USP7<sup>CRISPR</sup> cells.

See also [Figure S7](#).



- selection of APC mutations in colorectal, desmoid and duodenal tumours. *Hum. Mol. Genet.* **18**, 213–226.
- Li, M., Chen, D., Shiloh, A., Luo, J., Nikolaev, A.Y., Qin, J., and Gu, W. (2002). Deubiquitination of p53 by HAUSP is an important pathway for p53 stabilization. *Nature* **416**, 648–653.
- Li, M., Brooks, C.L., Kon, N., and Gu, W. (2004). A dynamic role of HAUSP in the p53-Mdm2 pathway. *Mol. Cell* **13**, 879–886.
- Li, V.S., Ng, S.S., Boersema, P.J., Low, T.Y., Karthaus, W.R., Gerlach, J.P., Mohammed, S., Heck, A.J., Maurice, M.M., Mahmoudi, T., and Clevers, H. (2012). Wnt signaling through inhibition of  $\beta$ -catenin degradation in an intact Axin1 complex. *Cell* **149**, 1245–1256.
- Liu, C., Li, Y., Semenov, M., Han, C., Baeg, G.H., Tan, Y., Zhang, Z., Lin, X., and He, X. (2002). Control of beta-catenin phosphorylation/degradation by a dual-kinase mechanism. *Cell* **108**, 837–847.
- Lustig, B., Jerchow, B., Sachs, M., Weiler, S., Pietsch, T., Karsten, U., van de Wetering, M., Clevers, H., Schlag, P.M., Birchmeier, W., and Behrens, J. (2002). Negative feedback loop of Wnt signaling through upregulation of conductin/axin2 in colorectal and liver tumors. *Mol. Cell. Biol.* **22**, 1184–1193.
- Ma, P., Yang, X., Kong, Q., Li, C., Yang, S., Li, Y., and Mao, B. (2014). The ubiquitin ligase RNF220 enhances canonical Wnt signaling through USP7-mediated deubiquitination of  $\beta$ -catenin. *Mol. Cell. Biol.* **34**, 4355–4366.
- MacDonald, B.T., Tamai, K., and He, X. (2009). Wnt/beta-catenin signaling: components, mechanisms, and diseases. *Dev. Cell* **17**, 9–26.
- Madan, B., Walker, M.P., Young, R., Quick, L., Orgel, K.A., Ryan, M., Gupta, P., Henrich, I.C., Ferrer, M., Marine, S., et al. (2016). USP6 oncogene promotes Wnt signaling by deubiquitylating Frizzleds. *Proc. Natl. Acad. Sci. USA* **113**, E2945–E2954.
- Meulmeester, E., Maurice, M.M., Boutell, C., Teunisse, A.F., Ova, H., Abraham, T.E., Dirks, R.W., and Jochemsen, A.G. (2005). Loss of HAUSP-mediated deubiquitination contributes to DNA damage-induced destabilization of Hdmx and Hdm2. *Mol. Cell* **18**, 565–576.
- Nagase, H., and Nakamura, Y. (1993). Mutations of the APC (adenomatous polyposis coli) gene. *Hum. Mutat.* **2**, 425–434.
- Nicholson, B., and Suresh Kumar, K.G. (2011). The multifaceted roles of USP7: new therapeutic opportunities. *Cell Biochem. Biophys.* **60**, 61–68.
- Nishisho, I., Nakamura, Y., Miyoshi, Y., Miki, Y., Ando, H., Horii, A., Koyama, K., Utsunomiya, J., Baba, S., and Hedge, P. (1991). Mutations of chromosome 5q21 genes in FAP and colorectal cancer patients. *Science* **253**, 665–669.
- Novellasademunt, L., Antas, P., and Li, V.S. (2015). Targeting Wnt signaling in colorectal cancer. A review in the theme: cell signaling: proteins, pathways and mechanisms. *Am. J. Physiol. Cell Physiol.* **309**, C511–C521.
- Polakis, P. (1995). Mutations in the APC gene and their implications for protein structure and function. *Curr. Opin. Genet. Dev.* **5**, 66–71.
- Pronobis, M.I., Rusan, N.M., and Peifer, M. (2015). A novel GSK3-regulated APC:Axin interaction regulates Wnt signaling by driving a catalytic cycle of efficient  $\beta$ catenin destruction. *eLife* **4**, e08022.
- Reverdy, C., Conrath, S., Lopez, R., Planquette, C., Atmanene, C., Collura, V., Harpon, J., Battaglia, V., Vivat, V., Sippl, W., and Colland, F. (2012). Discovery of specific inhibitors of human USP7/HAUSP deubiquitinating enzyme. *Chem. Biol.* **19**, 467–477.
- Roberts, D.M., Pronobis, M.I., Poulton, J.S., Waldmann, J.D., Stephenson, E.M., Hanna, S., and Peifer, M. (2011). Deconstructing the  $\beta$ catenin destruction complex: mechanistic roles for the tumor suppressor APC in regulating Wnt signaling. *Mol. Biol. Cell* **22**, 1845–1863.
- Rubinfeld, B., Souza, B., Albert, I., Müller, O., Chamberlain, S.H., Masiarz, F.R., Munemitsu, S., and Polakis, P. (1993). Association of the APC gene product with beta-catenin. *Science* **262**, 1731–1734.
- Sato, T., Vries, R.G., Snippert, H.J., van de Wetering, M., Barker, N., Stange, D.E., van Es, J.H., Abo, A., Kujala, P., Peters, P.J., and Clevers, H. (2009). Single Lgr5 stem cells build crypt-villus structures in vitro without a mesenchymal niche. *Nature* **459**, 262–265.
- Sato, T., van Es, J.H., Snippert, H.J., Stange, D.E., Vries, R.G., van den Born, M., Barker, N., Shroyer, N.F., van de Wetering, M., and Clevers, H. (2011). Paneth cells constitute the niche for Lgr5 stem cells in intestinal crypts. *Nature* **469**, 415–418.
- Schwank, G., Koo, B.K., Sasselli, V., Dekkers, J.F., Heo, I., Demircan, T., Sasaki, N., Boymans, S., Cuppen, E., van der Ent, C.K., et al. (2013). Functional repair of CFTR by CRISPR/Cas9 in intestinal stem cell organoids of cystic fibrosis patients. *Cell Stem Cell* **13**, 653–658.
- Sheng, Y., Saridakis, V., Sarkari, F., Duan, S., Wu, T., Arrowsmith, C.H., and Frappier, L. (2006). Molecular recognition of p53 and MDM2 by USP7/HAUSP. *Nat. Struct. Mol. Biol.* **13**, 285–291.
- Shi, J., Liu, Y., Xu, X., Zhang, W., Yu, T., Jia, J., and Liu, C. (2015). Deubiquitinase USP47/UBP64E regulates  $\beta$ -catenin ubiquitination and degradation and plays a positive role in Wnt signaling. *Mol. Cell. Biol.* **35**, 3301–3311.
- Su, L.K., Vogelstein, B., and Kinzler, K.W. (1993). Association of the APC tumor suppressor protein with catenins. *Science* **262**, 1734–1737.
- Su, Y., Fu, C., Ishikawa, S., Stella, A., Kojima, M., Shitoh, K., Schreiber, E.M., Day, B.W., and Liu, B. (2008). APC is essential for targeting phosphorylated beta-catenin to the SCFbeta-TrCP ubiquitin ligase. *Mol. Cell* **32**, 652–661.
- Tauriello, D.V., and Maurice, M.M. (2010). The various roles of ubiquitin in Wnt pathway regulation. *Cell Cycle* **9**, 3700–3709.
- Tetsu, O., and McCormick, F. (1999). Beta-catenin regulates expression of cyclin D1 in colon carcinoma cells. *Nature* **398**, 422–426.
- Tominaga, J., Fukunaga, Y., Abelardo, E., and Nagafuchi, A. (2008). Defining the function of beta-catenin tyrosine phosphorylation in cadherin-mediated cell-cell adhesion. *Genes Cells* **13**, 67–77.
- Tran, H., Bustos, D., Yeh, R., Rubinfeld, B., Lam, C., Shriver, S., Zilberley, I., Lee, M.W., Phu, L., Sarkar, A.A., et al. (2013). HectD1 E3 ligase modifies adenomatous polyposis coli (APC) with polyubiquitin to promote the APC-axin interaction. *J. Biol. Chem.* **288**, 3753–3767.
- Vogelstein, B., and Kinzler, K.W. (2004). Cancer genes and the pathways they control. *Nat. Med.* **10**, 789–799.
- Zhang, Y., Liu, S., Mickanin, C., Feng, Y., Charlat, O., Michaud, G.A., Schirle, M., Shi, X., Hild, M., Bauer, A., et al. (2011). RNF146 is a poly(ADP-ribose)-directed E3 ligase that regulates axin degradation and Wnt signalling. *Nat. Cell Biol.* **13**, 623–629.

Cell Reports, Volume 21

**Supplemental Information**

**USP7 Is a Tumor-Specific WNT Activator  
for APC-Mutated Colorectal Cancer  
by Mediating  $\beta$ -Catenin Deubiquitination**

**Laura Novellademunt, Valentina Foglizzo, Laura Cuadrado, Pedro Antas, Anna Kucharska, Vesela Encheva, Ambrosius P. Snijders, and Vivian S.W. Li**

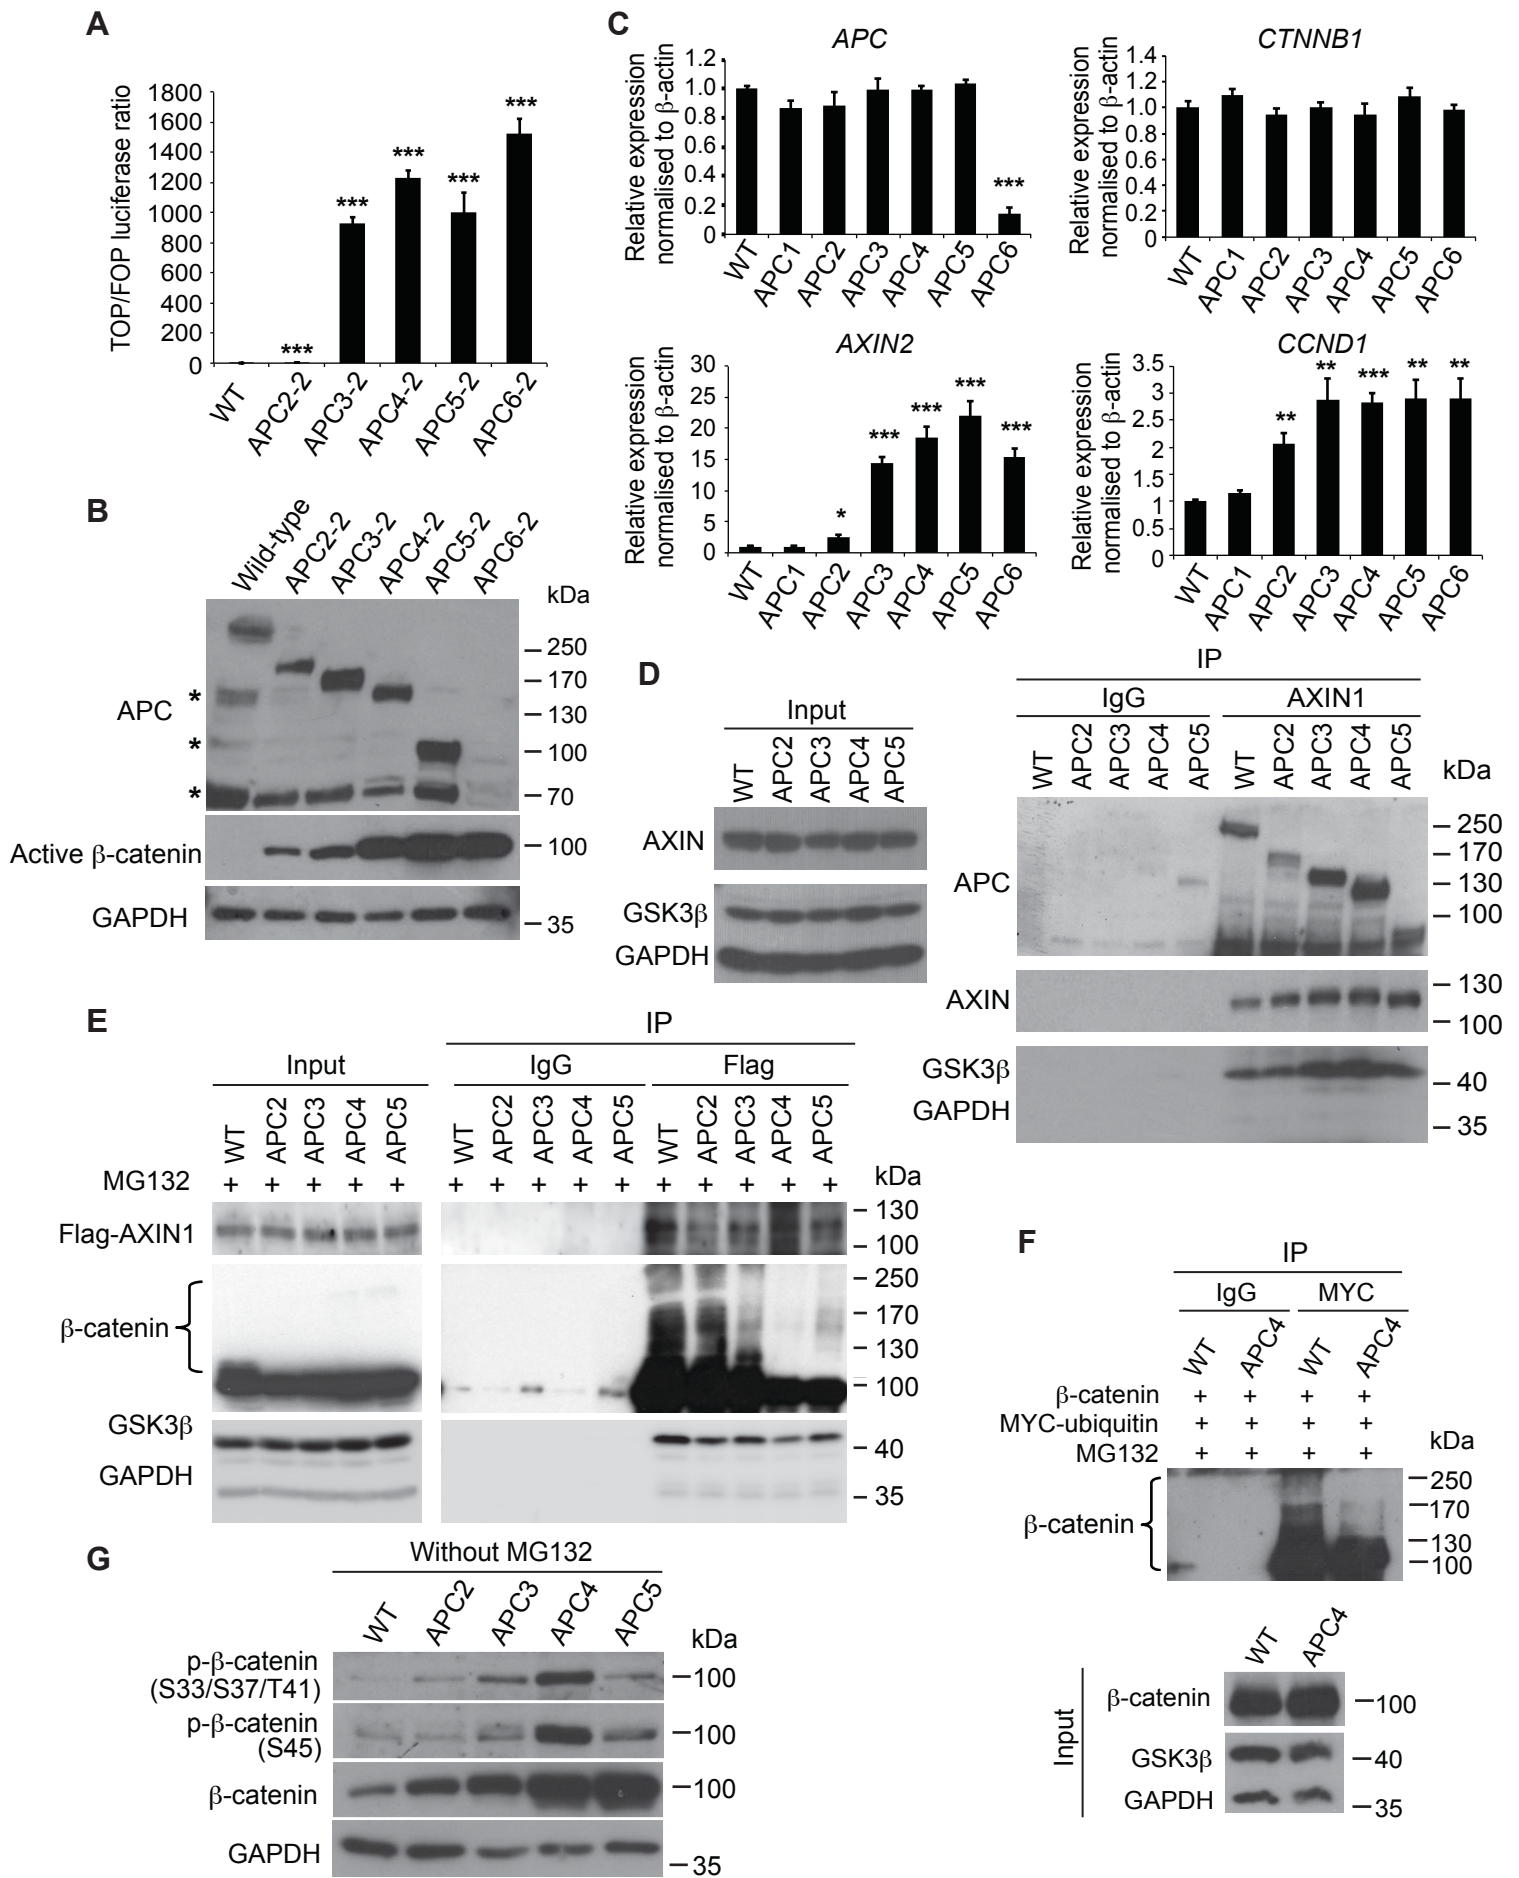

**Figure S1, Related to Figure 1. Characterization of the CRISPR-engineered APC truncations.** (A) Relative TOP/FOP activities of the HEK293T WT and the second clones of different CRISPR-engineered APC truncated lines. (B) Cell lysates were analyzed by western blotting using the indicated antibodies. (C) mRNA expression of APC,  $\beta$ -catenin (CTNNB1), AXIN2 and CyclinD1 (CCND1) was analyzed by qRT-PCR. Data are presented as fold change normalized to  $\beta$ -actin control in triplicate and are representative of at least three independent experiments. Error bars represent  $\pm$  standard error (\* $p < 0.05$ ; \*\* $p < 0.01$ ; \*\*\* $p < 0.001$ ). (D) Cell lysates were immunoprecipitated with AXIN1 antibody and IgG as control followed by western blotting using the indicated antibodies. (E) HEK293T WT and APC truncated cell lines were transfected with Flag-Axin1. Lysates were immunoprecipitated with anti-Flag antibody and IgG as control, followed by western blotting using the indicated antibodies. (F) HEK293T WT and APC4 cell lines were transfected with  $\beta$ -catenin and MYC-ubiquitin. Lysates were immunoprecipitated with anti-MYC antibody and IgG as control, followed by western blotting using the indicated antibodies. (G) Lysates from HEK293T WT and APC truncated cell lines without MG132 treatment were subjected to SDS-PAGE followed by western blot analysis using the indicated antibodies.

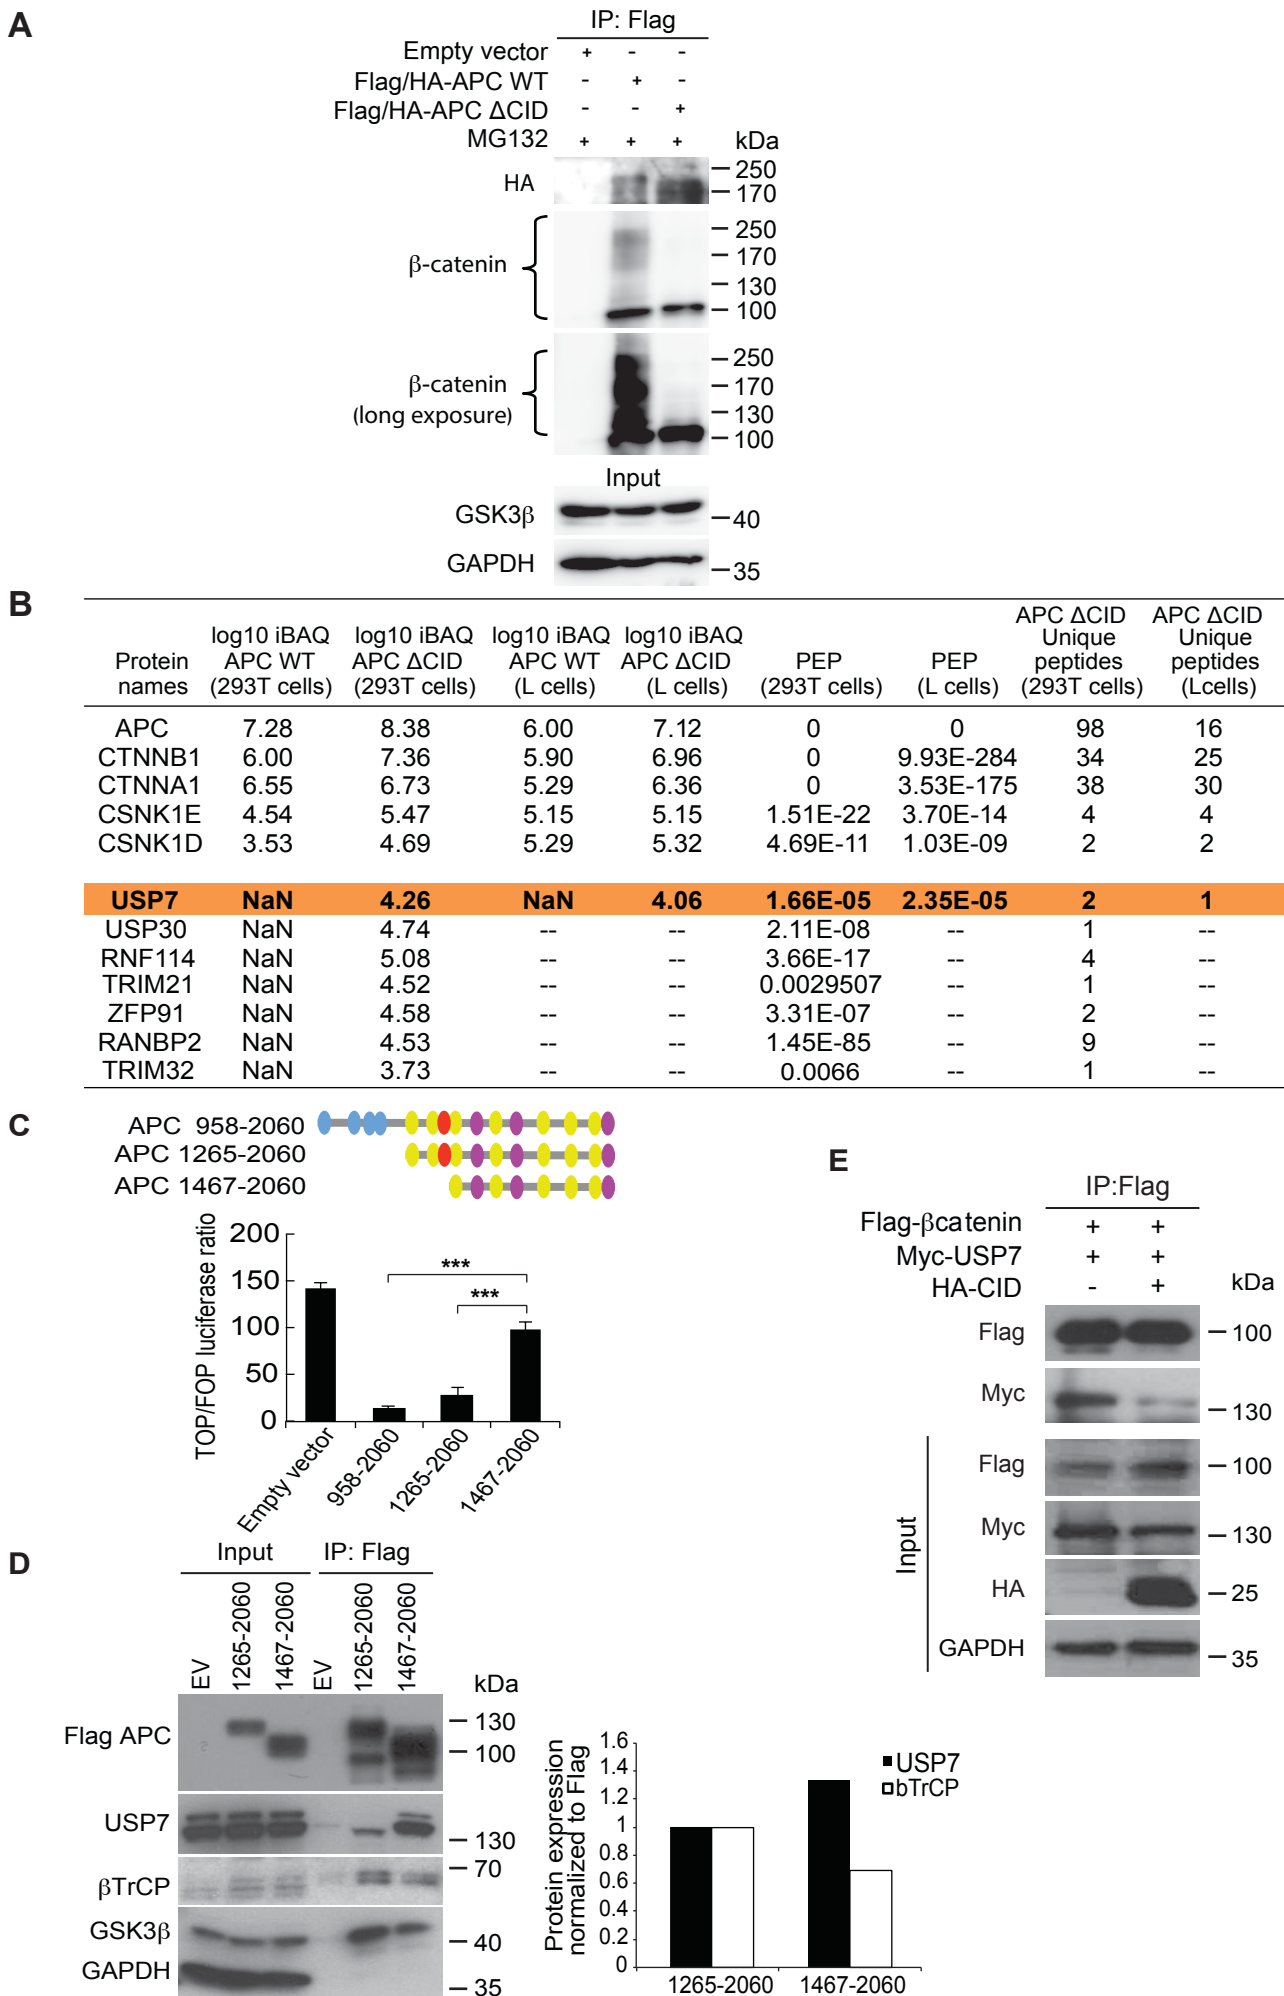

Figure S2, related to Figure 2.

**Figure S2, Related to Figure 2. Increased binding of USP7 to the destruction complex upon APC CID loss.** (A) HEK293T cells were transfected with empty vector (EV), APC WT, or APC  $\Delta$ CID. Lysates were immunoprecipitated with anti-Flag antibody followed by western blotting using the indicated antibodies. (B) Protein candidates identified from tandem affinity purification-coupled mass spectrometry in HEK293T and L cells expressing APC WT or APC  $\Delta$ CID. iBAQ, intensity based absolute quantification; PEP, posterior error probability (p-value for protein identification) (C) Schematic representation of the central region of APC (958-2060) and the indicated deletion constructs. Relative TOP/FOP activities of SW480 cells transfected with the above constructs or empty vector. Error bars represent  $\pm$  standard error from at least three independent experiments (\*\* $p < 0.001$ ). (D) APC4 cells were transfected with EV and the indicated APC truncated mutants. Lysates were immunoprecipitated with anti-Flag antibody followed by western blot analysis using the indicated antibodies. The graph represents the quantitation of the binding of USP7 and  $\beta$ TrCP in the Flag complexes corresponding to the blot shown in (D). (E) HEK293T cells were transfected with Flag- $\beta$ -catenin, MYC-USP7 and HA-CID when indicated. Lysates were immunoprecipitated with Flag followed by western blotting using the indicated antibodies.

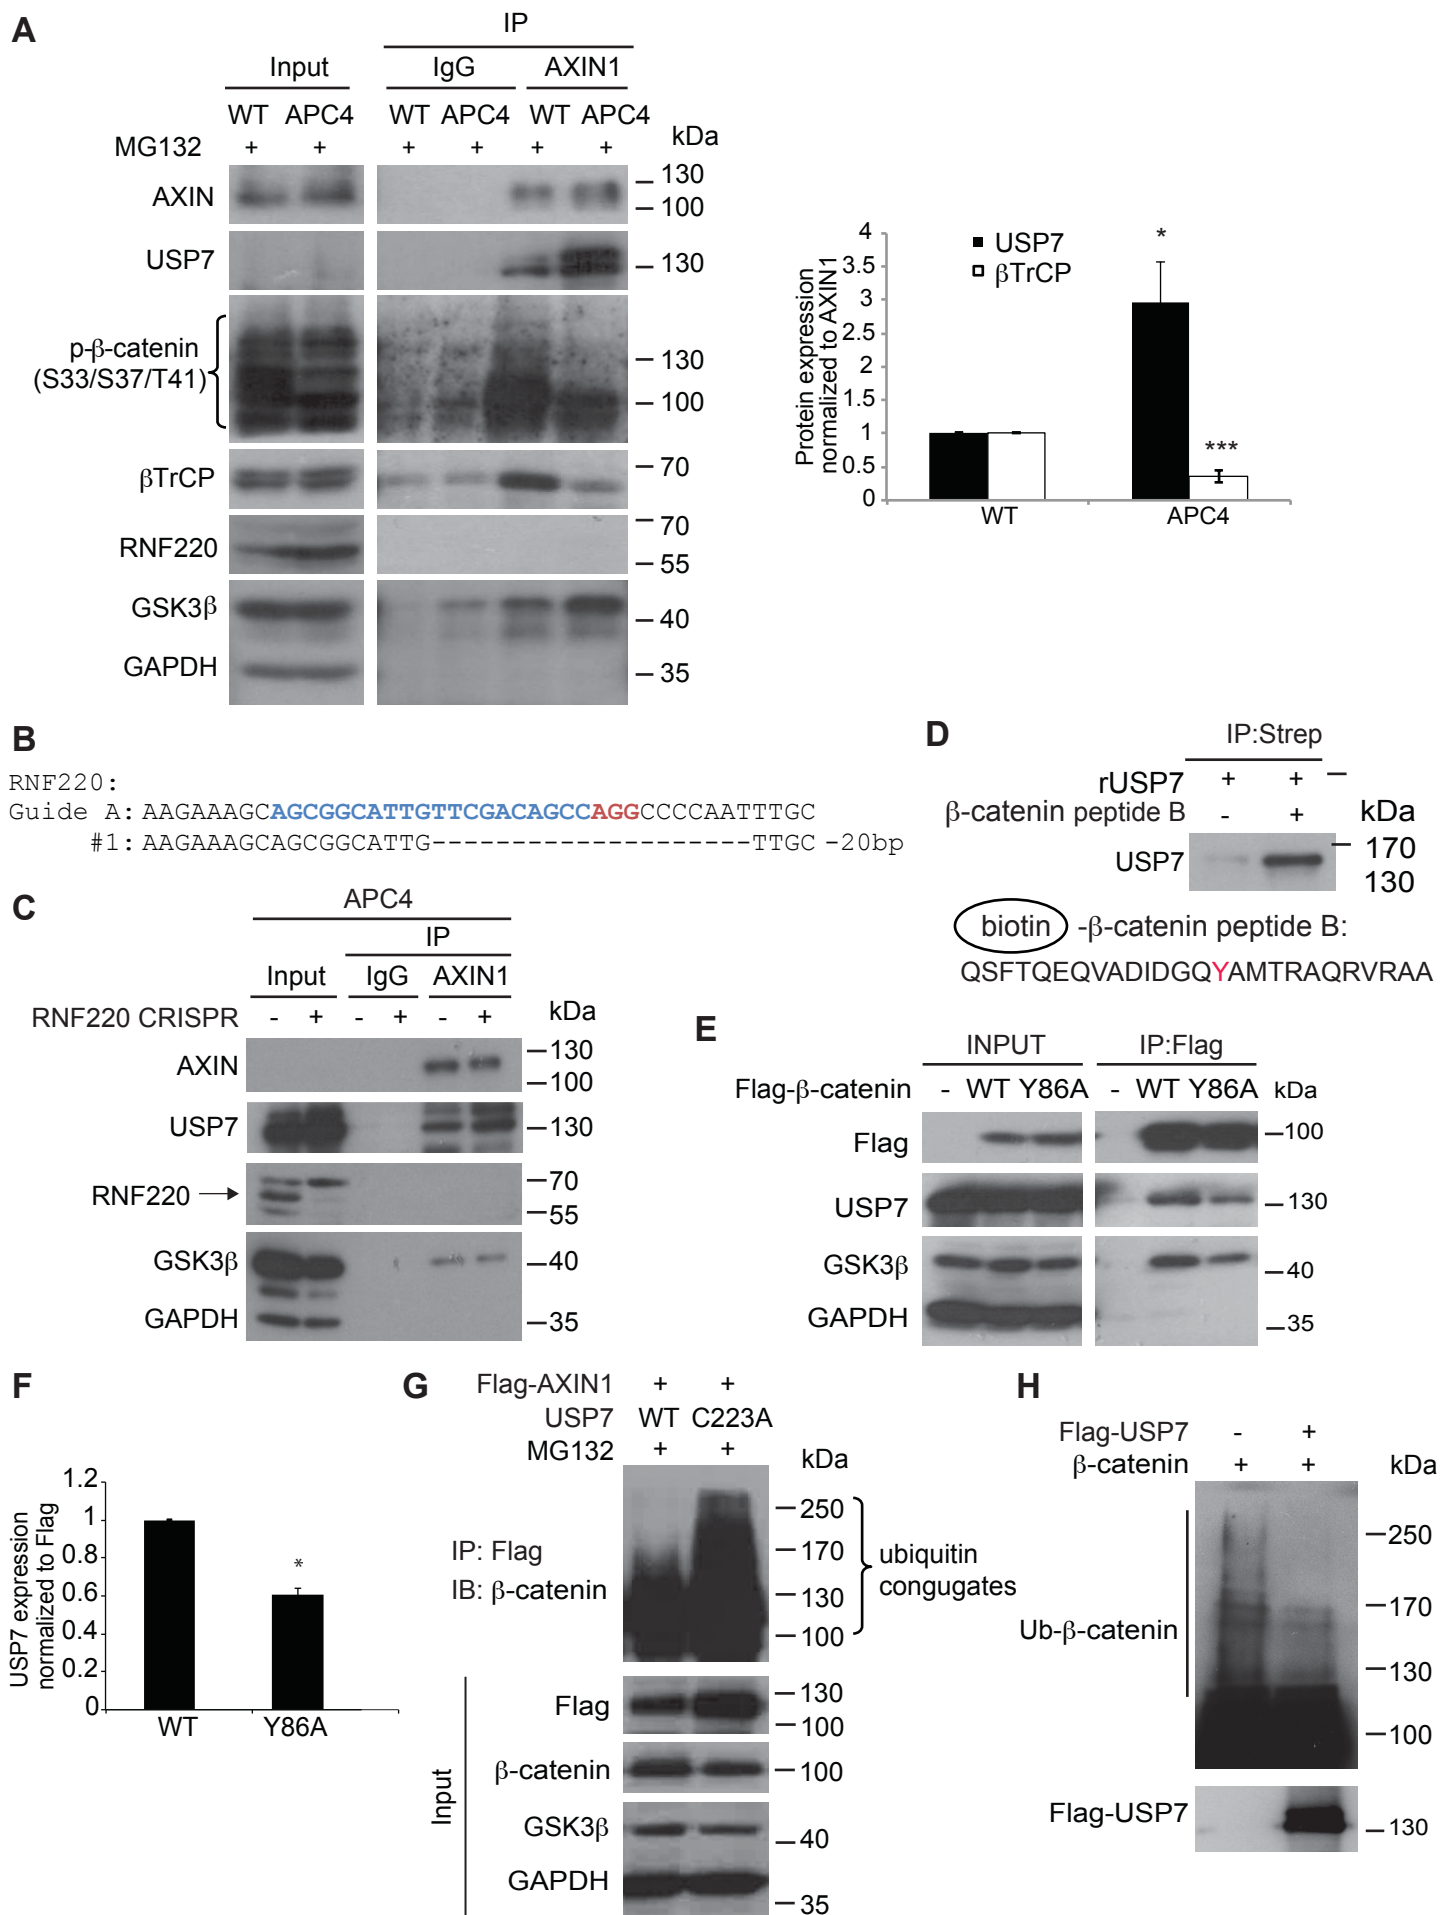

Figure S3, related to Figure 3.

**Figure S3, Related to Figure 3. USP7 binding to the  $\beta$ -catenin destruction complex is RNF220-independent.** (A) Destruction complexes in HEK293T WT and APC4 cells were immunoprecipitated with AXIN1-specific antibody followed by western blot analysis using the indicated antibodies. The graph represents the amount of USP7 and  $\beta$ TrCP in the Axin1 complexes. Error bars represent  $\pm$  standard error from at least three independent experiments (\* $p < 0.05$ ; \*\*\* $p < 0.001$ ). (B) RNF220 sequencing data showing mutation after CRISPR/Cas9 targeting in APC4 cells. (C) APC4 cells with or without RNF220 CRISPR targeting were immunoprecipitated using axin1 antibody. Lysates were analyzed by western blotting using the indicated antibodies. (D) Biotinylated peptide encoding  $\beta$ -catenin peptide B was assayed for binding to recombinant USP7 protein (rUSP7) in streptavidin-based peptide pull-down assays. Modification site Tyr86 is indicated in red. (E) USP7 showed reduced binding to the  $\beta$ -catenin Y86A mutant IP-complex compared to the WT. (F) Quantitation of the USP7 binding in the Flag complexes. Error bars represent  $\pm$  standard error from at least three independent experiments (\* $p < 0.05$ ). (G) HEK293T cells were co-transfected with Flag-Axin1 and USP7 WT or C223A mutant. Lysates were immunoprecipitated with anti-Flag antibody followed by western blot analysis using the indicated antibodies. (H) In vitro deubiquitination assay for  $\beta$ -catenin. Purified ubiquitinated  $\beta$ -catenin was incubated with or without purified Flag-USP7 and analysed by immunoblotting with antibodies for  $\beta$ -catenin and Flag.



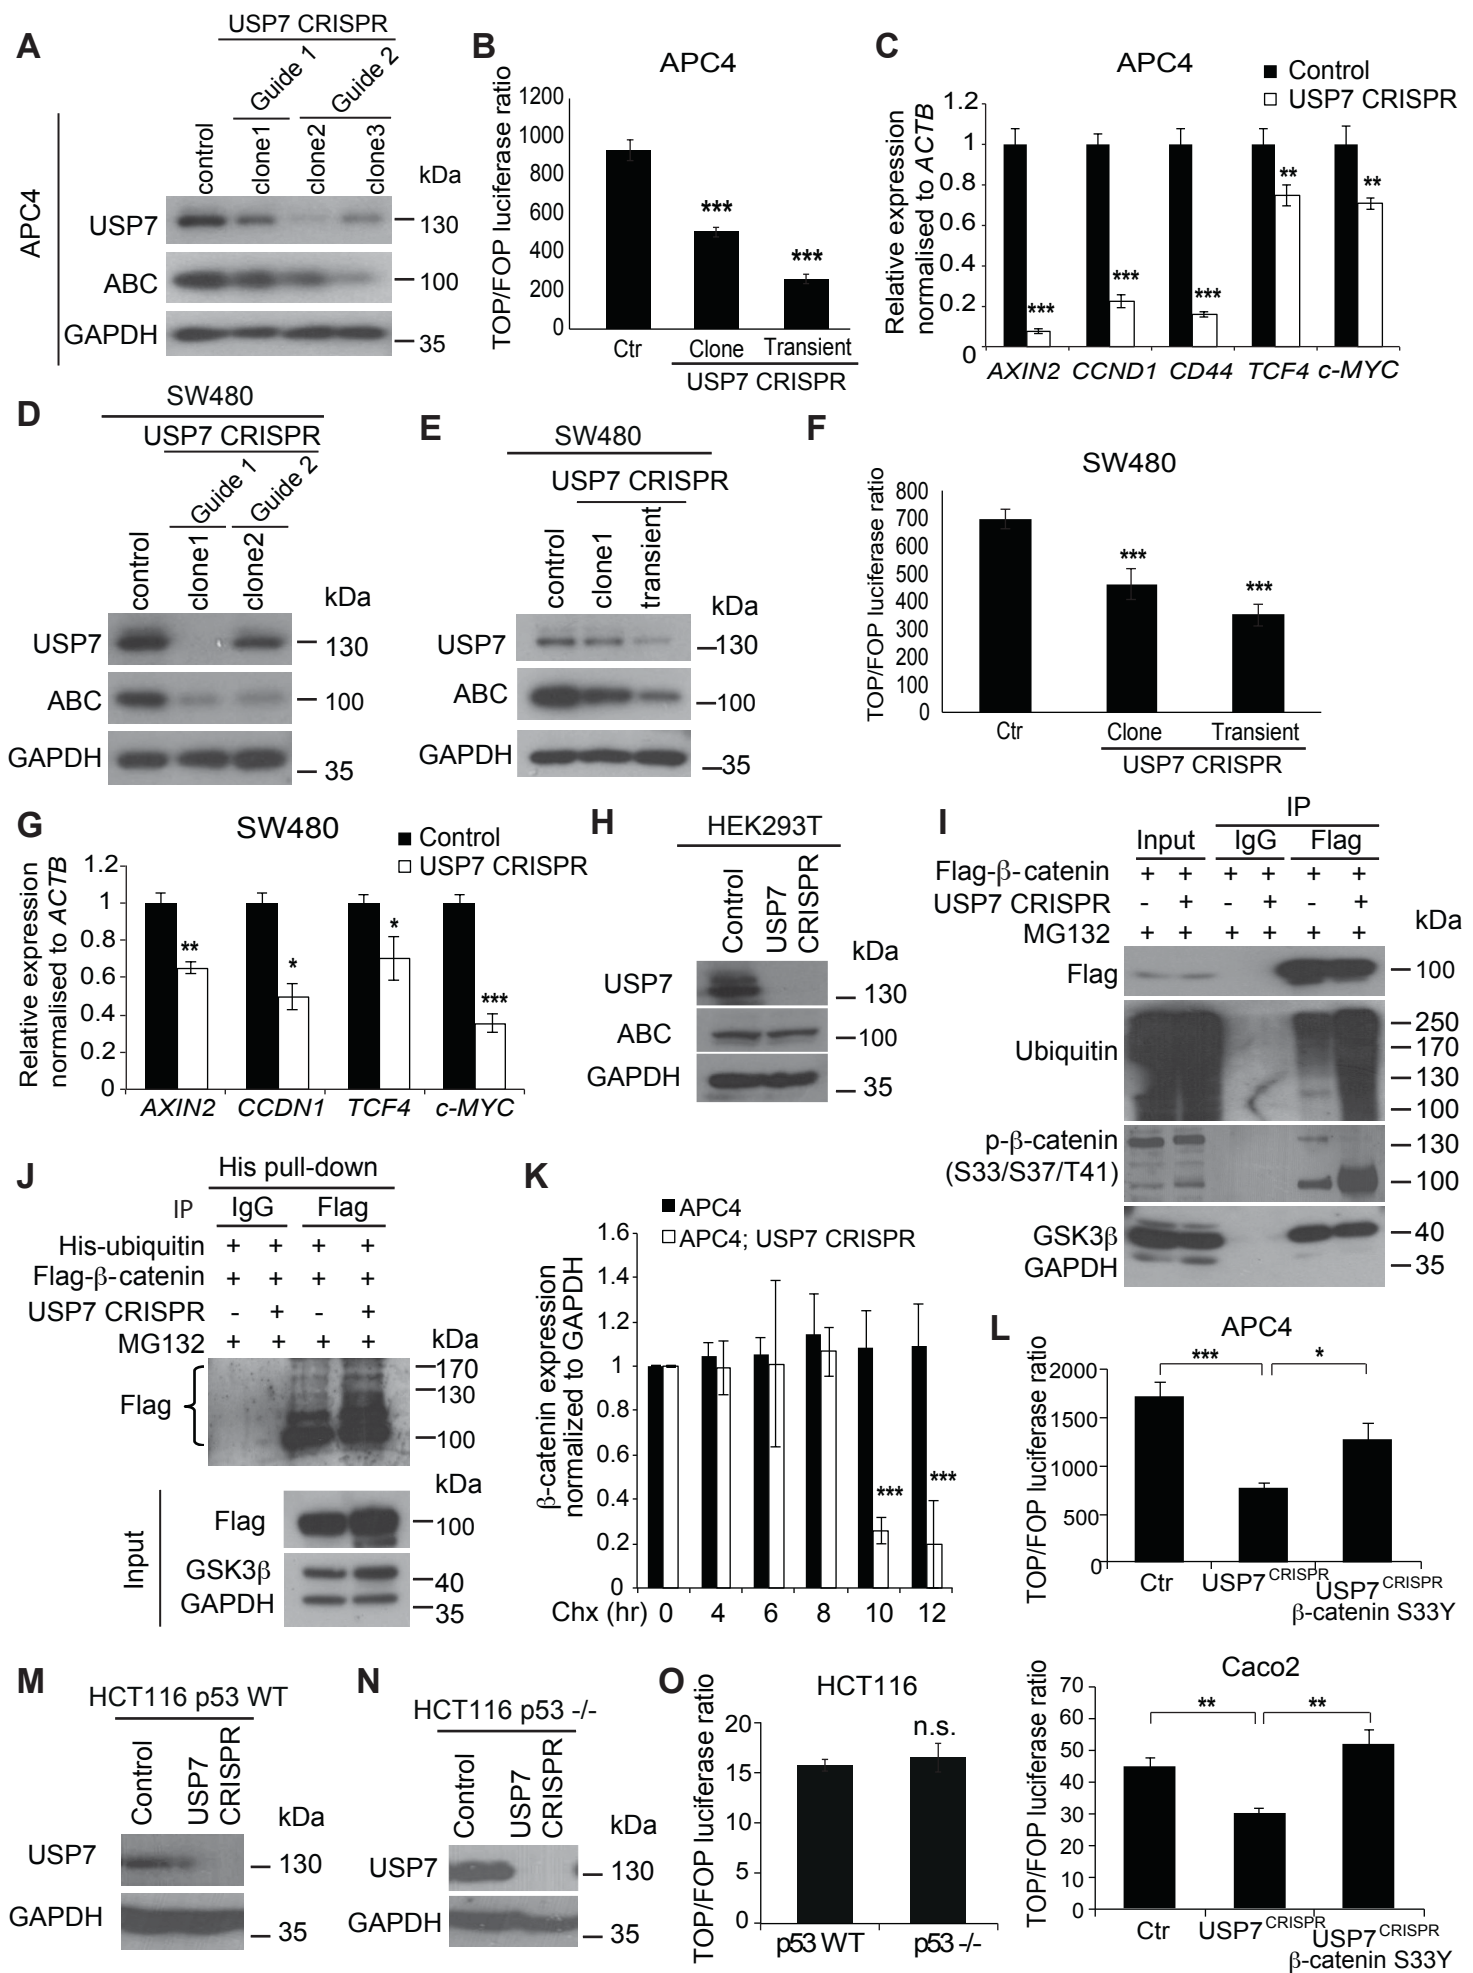

Figure S4, related to Figure 4.

**Figure S4, Related to Figure 4. USP7 depletion in APC-mutant cells suppresses aberrant Wnt activation.** (A) Western blot analysis of APC4 cells with USP7 CRISPR targeting using antibodies against USP7, active  $\beta$ -catenin (ABC) and GAPDH loading control. (B) Relative TOP/FOP activities of APC4 cells with transient USP7 CRISPR targeting or stable CRISPR clone. Error bars represent  $\pm$  standard error from at least three independent experiments ( $***p < 0.001$ ). (C) mRNA expression of AXIN2, CyclinD1 (CCND1), CD44, TCF4 and c-MYC was analyzed by qRT-PCR in APC4 cells control or USP7 CRISPR. Data are presented as fold change normalized to  $\beta$ -actin (ACTB) control from at least three independent experiments. Error bars represent  $\pm$  standard error ( $**p < 0.01$ ;  $***p < 0.001$ ). (D) Western blot analysis of SW480 with or without USP7 CRISPR targeting using the indicated antibodies. (E) Western blot analysis of the parental SW480, SW480 USP7 CRISPR stable clone or SW480 with transient CRISPR-targeting of USP7 using the indicated antibodies. (F) Relative TOP/FOP activities of the cells in (E). Error bars represent  $\pm$  standard error from at least three independent experiments ( $***p < 0.001$ ). (G) mRNA expression of AXIN2, CyclinD1 (CCND1), TCF4 and c-MYC was analyzed by qRT-PCR in SW480 cells control or USP7 CRISPR. Data are presented as fold change normalized to  $\beta$ -actin (ACTB) control from at least three independent experiments. Error bars represent  $\pm$  standard error ( $*p < 0.05$ ;  $**p < 0.01$ ;  $***p < 0.001$ ). (H) Western blot analysis of parental HEK293T and USP7 CRISPR-mutant clone using the indicated antibodies. (I) IP-coupled immunoblotting of transfected flag- $\beta$ -catenin in APC4 cells with or without USP7 CRISPR-targeting using the indicated antibodies. (J) APC4 cells with or without USP7 CRISPR-targeting were co-transfected with His-Ubiquitin and Flag- $\beta$ -catenin. Cell lysates were then used for immunoprecipitation with Flag antibody or control IgG as indicated. Flag and IgG complexes were eluted and used in His pull-down assays. Samples were analyzed by western blotting with the indicated antibodies. (K) Quantitation of  $\beta$ -catenin expression normalized to GAPDH in APC4 with or without USP7 CRISPR and treated with cycloheximide (Chx) for the indicated times as shown in Figure 4E. Error bars represent  $\pm$  standard error from at least two independent experiments ( $***p < 0.001$ ). (L) Relative TOP/FOP activities of APC4 (top) and Caco2 cells (bottom) when transfected with the indicated plasmids. Error bars represent  $\pm$  standard error from at least two independent experiments ( $*p < 0.05$ ;  $**p < 0.01$ ;  $***p < 0.001$ ). (M) Western blot analysis of HCT116 p53 WT cells with or without USP7 CRISPR-targeting using the indicated antibodies. (N) Western blot analysis of HCT116 p53 -/- cells with or without USP7 CRISPR-targeting using the indicated antibodies. (O) Relative TOP/FOP activities of the HCT116 p53 WT compared to HCT116 p53 -/- cells.

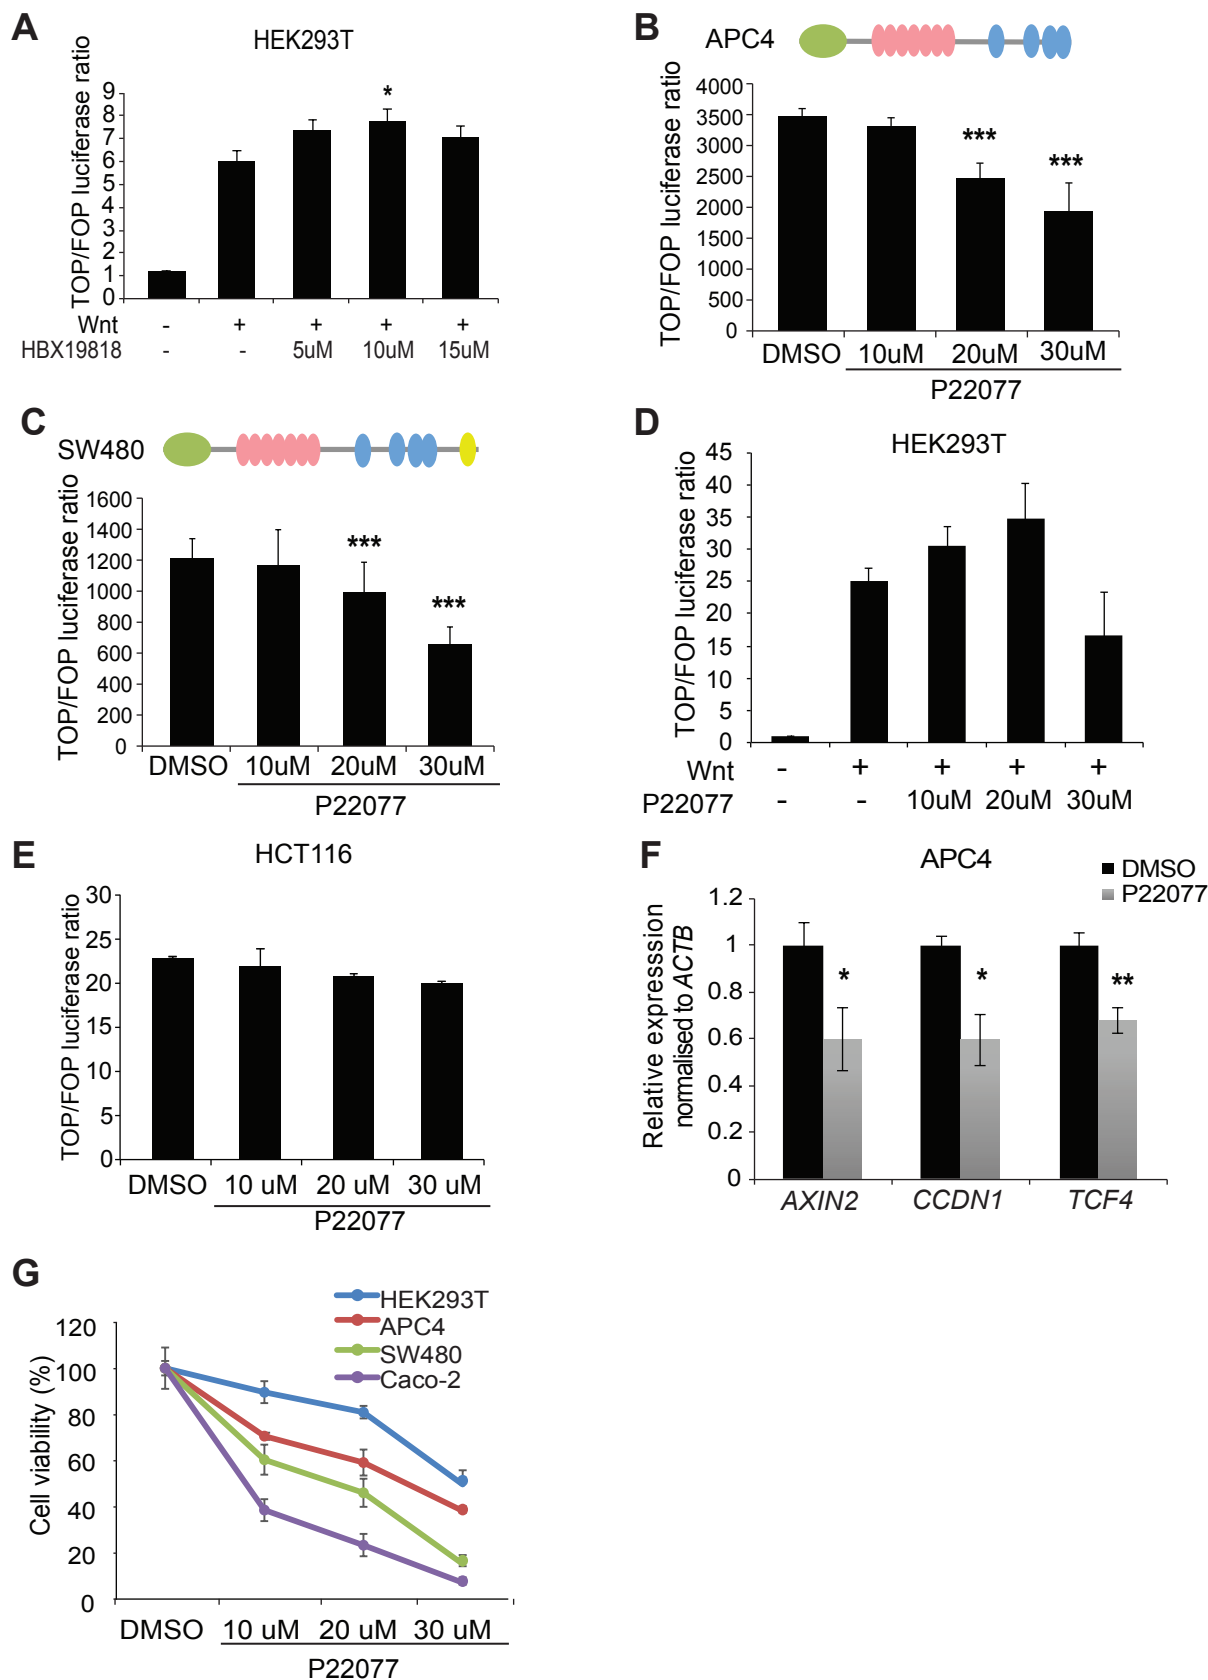

**Figure S5, Related to Figure 5. Small molecule inhibition of USP7 in different APC-mutant cell lines.** (A) Relative TOP/FOP activity of HEK293T cells treated with DMSO or HBX19818 at the indicated concentrations. Error bars represent  $\pm$  standard error from at least three independent experiments. (b-e) Relative TOP/FOP activities of APC4 (B), SW480 (C), HEK293T (D) and HCT116 (E) cells treated with DMSO or P22077 at the indicated concentrations. Error bars represent  $\pm$  standard error from at least three independent experiments. (F) mRNA expression of the indicated Wnt target genes was analyzed by qRT-PCR in APC4 cells treated with DMSO or 10  $\mu$ M P22077. Data are presented as fold change normalized to  $\beta$ -actin control in triplicate and are representative of at least three independent experiments. (G) MTT assay in the indicated cell lines treated with DMSO or P22077 at the indicated concentrations for 24 hours. Error bars represent  $\pm$  standard error from at least three independent experiments (\* $p$ <0.05; \*\* $p$ <0.01; \*\*\* $p$ <0.001)

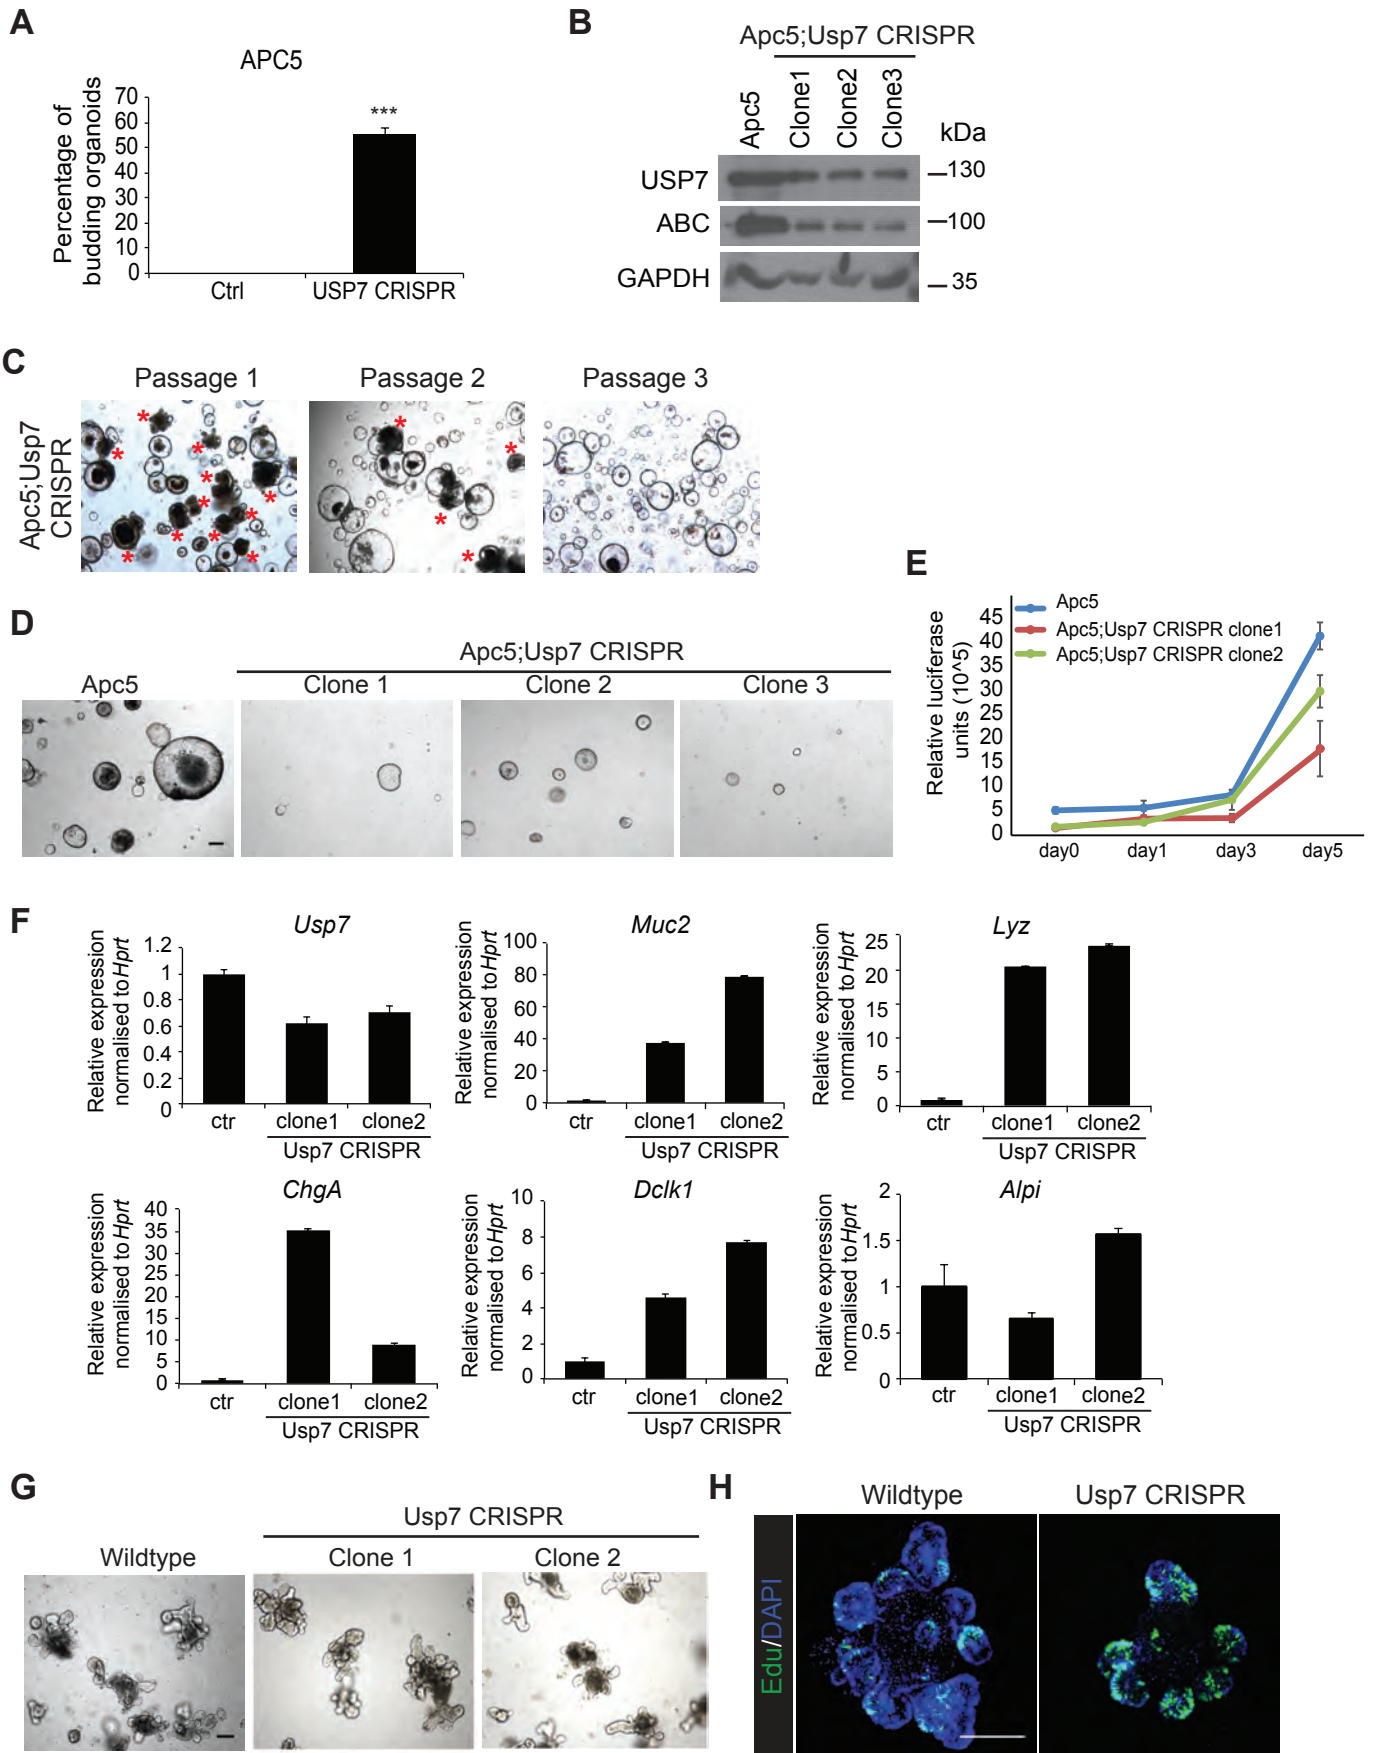

Figure S6, related to Figure 6.

**Figure S6, Related to Figure 6. Usp7 deletion in intestinal organoids.** (A) Percentage of budding organoids in APC5 after USP7 CRISPR. Error bars represent  $\pm$  standard error from at least three independent experiments (\*\* $p < 0.01$ ). (B) Western blot analysis of Apc5 organoids and the individual clones with Usp7 CRISPR-targeting using the indicated antibodies. (C) Representative photos of Apc5 Usp7 CRISPR organoids after several passages. Asterisks indicate budding organoids. Scale bar, 100  $\mu\text{m}$ . (D) Representative photos of colony formation assay in Apc5 organoids and the individual Usp7 CRISPR-clones after 7 days in culture. Scale bar, 100  $\mu\text{m}$ . (E) Cell Titer Glo luciferase assay of the indicated organoids at the indicated times. Error bars represent  $\pm$  standard error from at least three independent experiments. (F) qRT-PCR analysis of the mRNA expression of Usp7 and the differentiation markers of goblet cells (Mucin2 (Muc2)), Paneth cells (Lysozyme (Lys)), endocrine cells (Chromogranin A (ChgA)), tuft cells (Doublecortin-like kinase 1 protein (Dclk1)) and enterocytes (alkaline phosphatase (Alpi)). Data are presented as fold induction normalized to Hrpt1 housekeeping control in triplicates from one representative experiment. Error bars represent  $\pm$  standard error. (G) Representative photos of WT organoids and the USP7 deleted clones. Both number and size of spheres formed were significantly smaller in the Usp7-targeted Apc5 organoids. Scale bar, 100  $\mu\text{m}$ . (H) Immunostaining for proliferating cells after 1-hour 5-ethynyl-2'-deoxyuridine (EdU) incorporation.

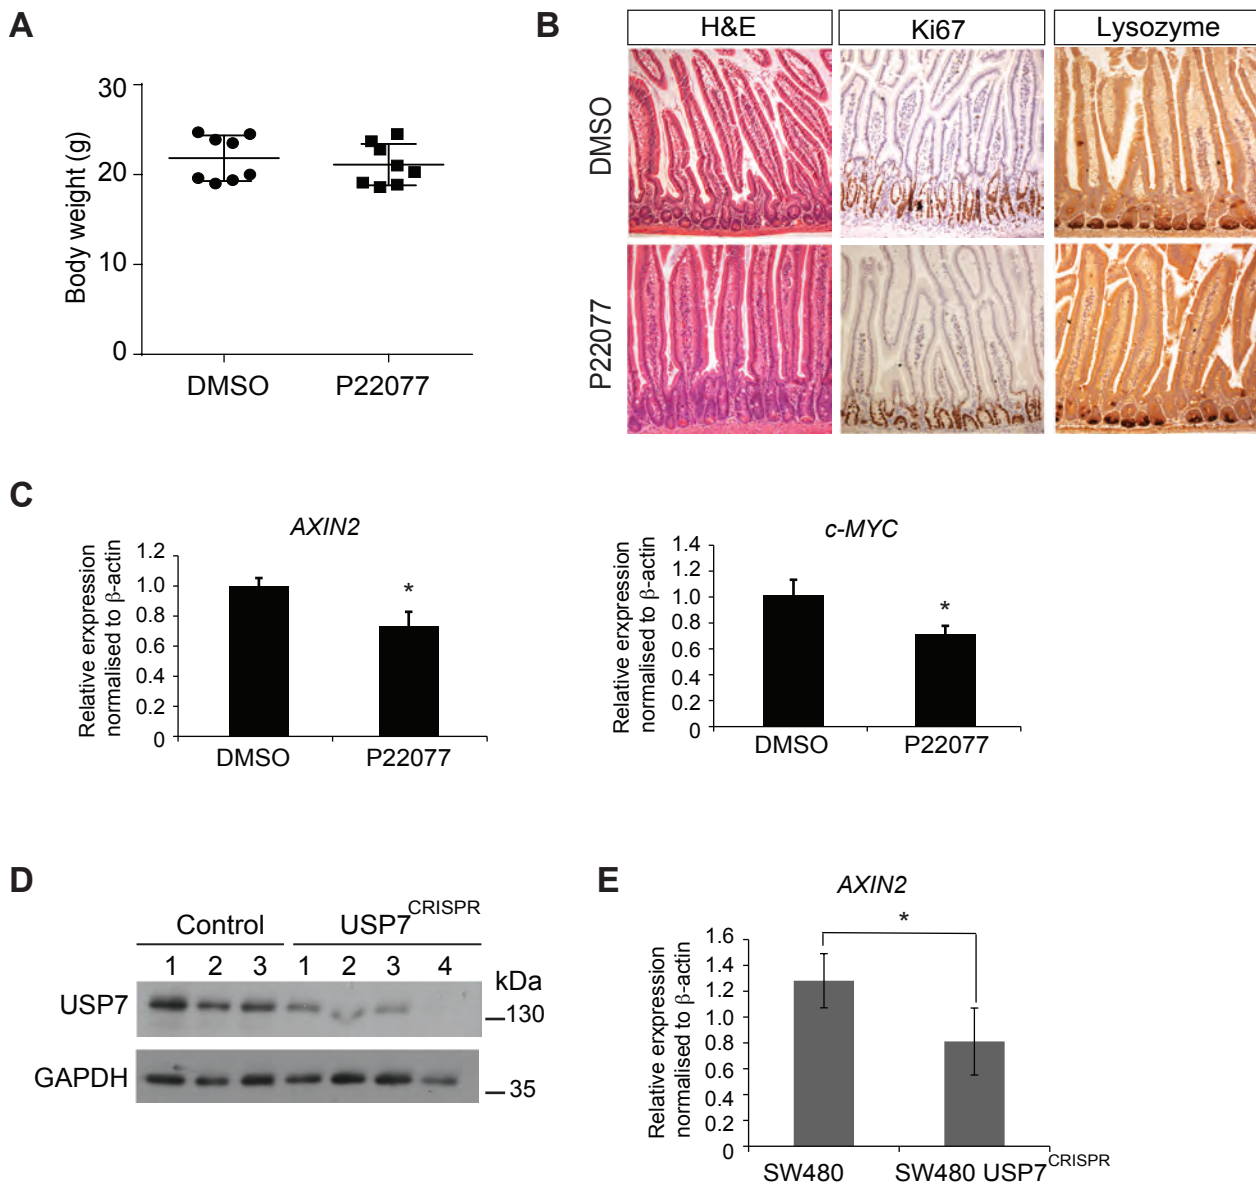

**Figure S7, Related to Figure 7. Inactivation of USP7 in SW480-derived xenograft tumors in vivo.** (A) Measurement of body weight from mice injected with SW480 treated with DMSO or P22077 inhibitor (30 mg/kg) at the end of the experiment (21 days). (B) Immunohistochemical analysis with Hematoxylin and eosin (H&E), marker of proliferation (Ki67) and Paneth cell marker (Lysozyme) in the intestines harvested from mice treated with DMSO or P22077 inhibitor at the end of the experiment (21 days). (C) mRNA expression of the Wnt target genes AXIN2 and c-MYC in the DMSO- or P22077-treated tumors was analyzed by qRT-PCR. Data is presented as fold induction normalized to  $\beta$ -actin control in triplicate with n=8 per condition. Error bars represent  $\pm$  standard error (\*p,0.05). (D) Western blot analysis of tumors derived from parental SW480 and SW480 USP7<sup>CRISPR</sup> cells at the end of the experiment using USP7 antibody and GAPDH loading control. (E) mRNA expression of the Wnt target AXIN2 was analyzed by qRT-PCR from the remaining tumor materials described in (D). Data is presented as fold induction normalized to  $\beta$ -actin housekeeping control in triplicate with n=4 per condition. Error bars represent  $\pm$  standard error (\*\*p<0.001)..

**Table S1, Related to Figure 1. Genomic DNA sequencing results depicting mutations in human APC.**

| APC1                                                                                |                                                                                                                                                                                                                                                                                                           |                                                                       |                        |                                                                                     |                                                               |                      |        |          |                      |        |
|-------------------------------------------------------------------------------------|-----------------------------------------------------------------------------------------------------------------------------------------------------------------------------------------------------------------------------------------------------------------------------------------------------------|-----------------------------------------------------------------------|------------------------|-------------------------------------------------------------------------------------|---------------------------------------------------------------|----------------------|--------|----------|----------------------|--------|
|                                                                                     | Wt: ACCAAGTCAGCTG <b>CCTGTGTACAAACTTCTACCATC</b> ACAAAACAGGTTGCAACCCC                                                                                                                                                                                                                                     |                                                                       |                        |                                                                                     |                                                               |                      |        |          |                      |        |
| gRNA 1                                                                              | <table border="0"> <tr> <td>ACCAAGTCAGCT-----AACTTCTACCATC</td> <td>ACAAAACAGGTTGCAACCCC</td> <td>-11 bp</td> </tr> <tr> <td>ACCAAGTCAGCTGCCTGTGTAC-----CATC</td> <td>ACAAAACAGGTTGCAACCCC</td> <td>-10 bp</td> </tr> <tr> <td>-----ATC</td> <td>ACAAAACAGGTTGCAACCCC</td> <td>-78 bp</td> </tr> </table> | ACCAAGTCAGCT-----AACTTCTACCATC                                        | ACAAAACAGGTTGCAACCCC   | -11 bp                                                                              | ACCAAGTCAGCTGCCTGTGTAC-----CATC                               | ACAAAACAGGTTGCAACCCC | -10 bp | -----ATC | ACAAAACAGGTTGCAACCCC | -78 bp |
| ACCAAGTCAGCT-----AACTTCTACCATC                                                      | ACAAAACAGGTTGCAACCCC                                                                                                                                                                                                                                                                                      | -11 bp                                                                |                        |                                                                                     |                                                               |                      |        |          |                      |        |
| ACCAAGTCAGCTGCCTGTGTAC-----CATC                                                     | ACAAAACAGGTTGCAACCCC                                                                                                                                                                                                                                                                                      | -10 bp                                                                |                        |                                                                                     |                                                               |                      |        |          |                      |        |
| -----ATC                                                                            | ACAAAACAGGTTGCAACCCC                                                                                                                                                                                                                                                                                      | -78 bp                                                                |                        |                                                                                     |                                                               |                      |        |          |                      |        |
| APC2                                                                                |                                                                                                                                                                                                                                                                                                           |                                                                       |                        |                                                                                     |                                                               |                      |        |          |                      |        |
|                                                                                     | Wt: AAAC TATTGATTCTGAAAAGGA <b>CCTATTAGATGATTCAGATGATGATGAT</b> ATTGAAATACTAGAAGA                                                                                                                                                                                                                         |                                                                       |                        |                                                                                     |                                                               |                      |        |          |                      |        |
| gRNA 1                                                                              | <table border="0"> <tr> <td>AAAC TATTGATTCTGAAAAGGACCTATTA<b>A</b>GATGATTCAGATGATGATGAT</td> <td>ATTGAAATACTAGAAGA</td> <td>+1bp</td> </tr> <tr> <td>AAAC TATTGATTCTGAAAAGGACCTATTA<b>T</b>GATGATTCAGATGATGATGAT</td> <td>ATTGAAATACTAGAAGA</td> <td>+1bp</td> </tr> </table>                             | AAAC TATTGATTCTGAAAAGGACCTATTA <b>A</b> GATGATTCAGATGATGATGAT         | ATTGAAATACTAGAAGA      | +1bp                                                                                | AAAC TATTGATTCTGAAAAGGACCTATTA <b>T</b> GATGATTCAGATGATGATGAT | ATTGAAATACTAGAAGA    | +1bp   |          |                      |        |
| AAAC TATTGATTCTGAAAAGGACCTATTA <b>A</b> GATGATTCAGATGATGATGAT                       | ATTGAAATACTAGAAGA                                                                                                                                                                                                                                                                                         | +1bp                                                                  |                        |                                                                                     |                                                               |                      |        |          |                      |        |
| AAAC TATTGATTCTGAAAAGGACCTATTA <b>T</b> GATGATTCAGATGATGATGAT                       | ATTGAAATACTAGAAGA                                                                                                                                                                                                                                                                                         | +1bp                                                                  |                        |                                                                                     |                                                               |                      |        |          |                      |        |
|                                                                                     | Wt: ATACAGAAAGATGTGGAATTA <b>AAGAATAATGCCTCCAGTTCAGG</b> AAAATGACAATG                                                                                                                                                                                                                                     |                                                                       |                        |                                                                                     |                                                               |                      |        |          |                      |        |
| gRNA 2                                                                              | <table border="0"> <tr> <td>ATACA-----GAAAATGACAATG</td> <td>-37 bp</td> </tr> <tr> <td>ATACAGAAAGATGTGGAATTAAGAATAATGCCTCCAG-----AAAATGACAATG</td> <td>-6 bp</td> </tr> </table>                                                                                                                         | ATACA-----GAAAATGACAATG                                               | -37 bp                 | ATACAGAAAGATGTGGAATTAAGAATAATGCCTCCAG-----AAAATGACAATG                              | -6 bp                                                         |                      |        |          |                      |        |
| ATACA-----GAAAATGACAATG                                                             | -37 bp                                                                                                                                                                                                                                                                                                    |                                                                       |                        |                                                                                     |                                                               |                      |        |          |                      |        |
| ATACAGAAAGATGTGGAATTAAGAATAATGCCTCCAG-----AAAATGACAATG                              | -6 bp                                                                                                                                                                                                                                                                                                     |                                                                       |                        |                                                                                     |                                                               |                      |        |          |                      |        |
| APC3                                                                                |                                                                                                                                                                                                                                                                                                           |                                                                       |                        |                                                                                     |                                                               |                      |        |          |                      |        |
|                                                                                     | Wt: ATAGTTTTGAGAGTCGTTTCGATTG <b>CCAGCTCCGTTCCAGAGTGAACCA</b> TGCAGTGGAAATGGTAAGT                                                                                                                                                                                                                         |                                                                       |                        |                                                                                     |                                                               |                      |        |          |                      |        |
| gRNA 1                                                                              | <table border="0"> <tr> <td>ATAGTTTTGAGAGTCGTTTCGATTGCCAGCT-----AGAGTGAACCA</td> <td>TGCAGTGGAAATGGTAAGT</td> <td>-6 bp with STOP</td> </tr> <tr> <td>ATAGTTTTGAGAGTCGTTTCGATTGCCAGCT<b>A</b>CCGTTCCAGAGTGAACCA</td> <td>TGCAGTGGAAATGGTAAGT</td> <td>+1 bp</td> </tr> </table>                           | ATAGTTTTGAGAGTCGTTTCGATTGCCAGCT-----AGAGTGAACCA                       | TGCAGTGGAAATGGTAAGT    | -6 bp with STOP                                                                     | ATAGTTTTGAGAGTCGTTTCGATTGCCAGCT <b>A</b> CCGTTCCAGAGTGAACCA   | TGCAGTGGAAATGGTAAGT  | +1 bp  |          |                      |        |
| ATAGTTTTGAGAGTCGTTTCGATTGCCAGCT-----AGAGTGAACCA                                     | TGCAGTGGAAATGGTAAGT                                                                                                                                                                                                                                                                                       | -6 bp with STOP                                                       |                        |                                                                                     |                                                               |                      |        |          |                      |        |
| ATAGTTTTGAGAGTCGTTTCGATTGCCAGCT <b>A</b> CCGTTCCAGAGTGAACCA                         | TGCAGTGGAAATGGTAAGT                                                                                                                                                                                                                                                                                       | +1 bp                                                                 |                        |                                                                                     |                                                               |                      |        |          |                      |        |
|                                                                                     | Wt: TAAGCCCC <b>AGTGATCTTCCAGATAGCCCTGG</b> ACAAACCATGCCACCAA                                                                                                                                                                                                                                             |                                                                       |                        |                                                                                     |                                                               |                      |        |          |                      |        |
| gRNA 2                                                                              | <table border="0"> <tr> <td>TAAGCCCCAGTGATCTTCCAG-----ACAAACCATGCCACCAA</td> <td>-10 bp with stop codon</td> </tr> </table>                                                                                                                                                                               | TAAGCCCCAGTGATCTTCCAG-----ACAAACCATGCCACCAA                           | -10 bp with stop codon |                                                                                     |                                                               |                      |        |          |                      |        |
| TAAGCCCCAGTGATCTTCCAG-----ACAAACCATGCCACCAA                                         | -10 bp with stop codon                                                                                                                                                                                                                                                                                    |                                                                       |                        |                                                                                     |                                                               |                      |        |          |                      |        |
| APC4                                                                                |                                                                                                                                                                                                                                                                                                           |                                                                       |                        |                                                                                     |                                                               |                      |        |          |                      |        |
|                                                                                     | Wt: GCAGTGAGAATACGTCCA <b>CACCTTCATCTAATGCCAAGAGG</b> CAGAATCAGCTCCATCCAAGTTCTGCA                                                                                                                                                                                                                         |                                                                       |                        |                                                                                     |                                                               |                      |        |          |                      |        |
| gRNA 1                                                                              | <table border="0"> <tr> <td>GCAGTGAGAATACGTCCACACCTTCATCTAATGC-----AGAATCAGCTCCATCCAAGTTCTGCA</td> <td>-8bp</td> </tr> <tr> <td>GCAGTGAGAATACGTCCACACCTTCATCTAATGCC<b>C</b>AAGAGGCAGAATCAGCTCCATCCAAGTTCTGCA</td> <td>+1bp</td> </tr> </table>                                                            | GCAGTGAGAATACGTCCACACCTTCATCTAATGC-----AGAATCAGCTCCATCCAAGTTCTGCA     | -8bp                   | GCAGTGAGAATACGTCCACACCTTCATCTAATGCC <b>C</b> AAGAGGCAGAATCAGCTCCATCCAAGTTCTGCA      | +1bp                                                          |                      |        |          |                      |        |
| GCAGTGAGAATACGTCCACACCTTCATCTAATGC-----AGAATCAGCTCCATCCAAGTTCTGCA                   | -8bp                                                                                                                                                                                                                                                                                                      |                                                                       |                        |                                                                                     |                                                               |                      |        |          |                      |        |
| GCAGTGAGAATACGTCCACACCTTCATCTAATGCC <b>C</b> AAGAGGCAGAATCAGCTCCATCCAAGTTCTGCA      | +1bp                                                                                                                                                                                                                                                                                                      |                                                                       |                        |                                                                                     |                                                               |                      |        |          |                      |        |
|                                                                                     | Wt: AATGCCAAGAGGCAGAATCAGCTCCATCCAAGTTCTGCACAGAG <b>TAGAAGTGGTCAGCCTCAAAGG</b> CTGCCACTTGCAAAGTTTCTTCTA                                                                                                                                                                                                   |                                                                       |                        |                                                                                     |                                                               |                      |        |          |                      |        |
| gRNA 2                                                                              | <table border="0"> <tr> <td>AATGCCAAGAGGCAGAATCA-----CTTGCAAAGTTTCTTCTA</td> <td>-53bp</td> </tr> <tr> <td>AATGCCAAGAGGCAGAATCAGCTCCATCCAAGTTCTGCACAGAGTAGAAGTGGTCAGCC-----ACTTGCAAAGTTTCTTCTA</td> <td>-13bp</td> </tr> </table>                                                                         | AATGCCAAGAGGCAGAATCA-----CTTGCAAAGTTTCTTCTA                           | -53bp                  | AATGCCAAGAGGCAGAATCAGCTCCATCCAAGTTCTGCACAGAGTAGAAGTGGTCAGCC-----ACTTGCAAAGTTTCTTCTA | -13bp                                                         |                      |        |          |                      |        |
| AATGCCAAGAGGCAGAATCA-----CTTGCAAAGTTTCTTCTA                                         | -53bp                                                                                                                                                                                                                                                                                                     |                                                                       |                        |                                                                                     |                                                               |                      |        |          |                      |        |
| AATGCCAAGAGGCAGAATCAGCTCCATCCAAGTTCTGCACAGAGTAGAAGTGGTCAGCC-----ACTTGCAAAGTTTCTTCTA | -13bp                                                                                                                                                                                                                                                                                                     |                                                                       |                        |                                                                                     |                                                               |                      |        |          |                      |        |
| APC5                                                                                |                                                                                                                                                                                                                                                                                                           |                                                                       |                        |                                                                                     |                                                               |                      |        |          |                      |        |
|                                                                                     | Wt: GATTATGTTTTTGCACA <b>CAATCGACATGATGATAATAGG</b> TCAGACAATTTTAATACTGG                                                                                                                                                                                                                                  |                                                                       |                        |                                                                                     |                                                               |                      |        |          |                      |        |
| gRNA 1                                                                              | <table border="0"> <tr> <td>GATTATGTTTTTGCACCAATC-----GATGATAATAGGTCAGACAATTTTAATACTGG</td> <td>-5 bp</td> </tr> <tr> <td>GATTATGTTTTTGCACCAATCG-----ATAGGTCAGACAATTTTAATACTGG</td> <td>-11 bp</td> </tr> </table>                                                                                        | GATTATGTTTTTGCACCAATC-----GATGATAATAGGTCAGACAATTTTAATACTGG            | -5 bp                  | GATTATGTTTTTGCACCAATCG-----ATAGGTCAGACAATTTTAATACTGG                                | -11 bp                                                        |                      |        |          |                      |        |
| GATTATGTTTTTGCACCAATC-----GATGATAATAGGTCAGACAATTTTAATACTGG                          | -5 bp                                                                                                                                                                                                                                                                                                     |                                                                       |                        |                                                                                     |                                                               |                      |        |          |                      |        |
| GATTATGTTTTTGCACCAATCG-----ATAGGTCAGACAATTTTAATACTGG                                | -11 bp                                                                                                                                                                                                                                                                                                    |                                                                       |                        |                                                                                     |                                                               |                      |        |          |                      |        |
|                                                                                     | Wt: ATAGACAATTTAAGTCC <b>CAAGGCATCTCATCGTAGTAAG</b> CAGAGACACAAGCAAAGTCT                                                                                                                                                                                                                                  |                                                                       |                        |                                                                                     |                                                               |                      |        |          |                      |        |
| gRNA 2                                                                              | <table border="0"> <tr> <td>ATAGACAATTTAAGTCCCAAGG<b>A</b>CATCTCATCGTAGTAAGCAGAGACACAAGCAAAGTCT</td> <td>+1 bp</td> </tr> <tr> <td>ATAGACAATTTAAGTCCCAAG-----AGCAGAGACACAAGCAAAGTCT</td> <td>-16 bp</td> </tr> </table>                                                                                   | ATAGACAATTTAAGTCCCAAGG <b>A</b> CATCTCATCGTAGTAAGCAGAGACACAAGCAAAGTCT | +1 bp                  | ATAGACAATTTAAGTCCCAAG-----AGCAGAGACACAAGCAAAGTCT                                    | -16 bp                                                        |                      |        |          |                      |        |
| ATAGACAATTTAAGTCCCAAGG <b>A</b> CATCTCATCGTAGTAAGCAGAGACACAAGCAAAGTCT               | +1 bp                                                                                                                                                                                                                                                                                                     |                                                                       |                        |                                                                                     |                                                               |                      |        |          |                      |        |
| ATAGACAATTTAAGTCCCAAG-----AGCAGAGACACAAGCAAAGTCT                                    | -16 bp                                                                                                                                                                                                                                                                                                    |                                                                       |                        |                                                                                     |                                                               |                      |        |          |                      |        |
| APC6                                                                                |                                                                                                                                                                                                                                                                                                           |                                                                       |                        |                                                                                     |                                                               |                      |        |          |                      |        |
|                                                                                     | Wt: TTATTTTTTCAGTGCCAGCT <b>CCTGTTGAACATCAGATCTGTCC</b> TGCTGTGTGTGTTCTAATGAAA                                                                                                                                                                                                                            |                                                                       |                        |                                                                                     |                                                               |                      |        |          |                      |        |
| gRNA 1                                                                              | <table border="0"> <tr> <td>TTATTTTTTCAGTGCCAGCTCC----GAACATCAGATCTGTCCCTGCTGTGTGTGTTCTAATGAAA</td> <td>- 4bp</td> </tr> <tr> <td>TTATTTTTTCAGTGCCAGCTCCTGT-GAACATCAGATCTGTCCCTGCTGTGTGTGTTCTAATGAAA</td> <td>-1 bp</td> </tr> </table>                                                                   | TTATTTTTTCAGTGCCAGCTCC----GAACATCAGATCTGTCCCTGCTGTGTGTGTTCTAATGAAA    | - 4bp                  | TTATTTTTTCAGTGCCAGCTCCTGT-GAACATCAGATCTGTCCCTGCTGTGTGTGTTCTAATGAAA                  | -1 bp                                                         |                      |        |          |                      |        |
| TTATTTTTTCAGTGCCAGCTCC----GAACATCAGATCTGTCCCTGCTGTGTGTGTTCTAATGAAA                  | - 4bp                                                                                                                                                                                                                                                                                                     |                                                                       |                        |                                                                                     |                                                               |                      |        |          |                      |        |
| TTATTTTTTCAGTGCCAGCTCCTGT-GAACATCAGATCTGTCCCTGCTGTGTGTGTTCTAATGAAA                  | -1 bp                                                                                                                                                                                                                                                                                                     |                                                                       |                        |                                                                                     |                                                               |                      |        |          |                      |        |
|                                                                                     | Wt: TTATTTTTTCAGTGCCAGCT <b>CCTGTTGAACATCAGATCTGTCC</b> TGCTGTGTGTGTTCTAATG                                                                                                                                                                                                                               |                                                                       |                        |                                                                                     |                                                               |                      |        |          |                      |        |
| gRNA 2                                                                              | <table border="0"> <tr> <td>TTATTTTTTCAGTGCCAGCTCCTGT-----CCTGCTGTGTGTGTTCTAATG</td> <td>-16 bp</td> </tr> <tr> <td>TTATTTTTTCAGT-----GAACATCAGATCTGTCCCTGCTGTGTGTGTTCTAATG</td> <td>-13 bp</td> </tr> </table>                                                                                           | TTATTTTTTCAGTGCCAGCTCCTGT-----CCTGCTGTGTGTGTTCTAATG                   | -16 bp                 | TTATTTTTTCAGT-----GAACATCAGATCTGTCCCTGCTGTGTGTGTTCTAATG                             | -13 bp                                                        |                      |        |          |                      |        |
| TTATTTTTTCAGTGCCAGCTCCTGT-----CCTGCTGTGTGTGTTCTAATG                                 | -16 bp                                                                                                                                                                                                                                                                                                    |                                                                       |                        |                                                                                     |                                                               |                      |        |          |                      |        |
| TTATTTTTTCAGT-----GAACATCAGATCTGTCCCTGCTGTGTGTGTTCTAATG                             | -13 bp                                                                                                                                                                                                                                                                                                    |                                                                       |                        |                                                                                     |                                                               |                      |        |          |                      |        |

**Table S2, Related to Figure 4. Genomic DNA sequencing results depicting mutations in human *USP7*.**

USP7 CRISPR

|         |  |                                                                    |
|---------|--|--------------------------------------------------------------------|
| APC4    |  | WT: GATTCCACGTAAGACAGTTTAAATGATGCAACTACAAACCCCCACATCGTTGTAT        |
|         |  | #1: GATTCCACGTAAGACA-----GTAT +35 bp                               |
|         |  | #2: GATTCCACGTAAGACAGTTTAAATGATGCAACTACAAACCCCCACATCGTTGTAT wt     |
|         |  |                                                                    |
| SW480   |  | WT: GATTCCACGTAAGACAGTTTAAATGATGCAACTACAAACCCCCACATCGTTGTAT        |
|         |  | #1: GATTCCACGTAAGACA-----GTAT +35 bp                               |
|         |  | #2: GATTCCACGTAAGACAGTTTAAATGATGCAACTACAAACCCCCACATCGTTGTAT wt     |
|         |  |                                                                    |
| HEK293T |  | WT: CTTTTATCCAGACAGACCACACCAAAAAA-----GCGTAGGAT                    |
|         |  | #1: CTTTTATCCAGACAGACCACACCATCAGATTCTTTCTCCAGTGCATAGGAT +13 bp     |
|         |  | #2: CTTTTATCCAGACAGACCACACCAAAAAA-----AGGAT -5 bp                  |
|         |  |                                                                    |
| HCT116  |  | WT: CTTTTATCCAGACAGACCACACCAAAAAAAGCGTAGGAT                        |
| p53 WT  |  | #1: CTTTTATCCAGACAGACCACACCAAAAAA-----AGGAT -5 bp                  |
|         |  |                                                                    |
| HCT116  |  | WT: GGATAAAAGCGTGGCATCACCATAATCTTCCATGGCAGATTTTCGCACAAAACACG       |
| p53 -/- |  | #1: GGATAAAAGCGTGGCA-CACCATAATCTTCCATGGCAGATTTTCGCACAAAACACG -1 bp |



**Table S3, Related to Figure 6. Genomic DNA sequencing results depicting mutations in mouse *Apc* and *Usp7*.**

**Mouse *Apc***

**APC2.5**

**Wt:** CAGACTGCTGTAATGCTGCCGTGCAGAGGTTGCAGGTCCTTCCAGACGTGGATACTTTG  
 CAGACTGCTGTAATGCTGCCGTG--GAGGGTGCAGGTCCTTCCAGACGTGGATACTTTG **-2 bp**  
 CAGACTGCTGTAATGCTGCCGTGAGTCCTGTCGGGTTTCGCCACCTCTGACTTGAGCGTCGATTTTTGTGATACTCGCAGAGGGTGCAGGTCCTTCCAG **+54 bp**

**APC3**

**Wt:** GAGTGAGCCATGTAGTGGAATGGTGAGTGGCATCATAAGC  
 GAGTGAGCCATGTAGTGGAATGG-----+238-----TGAGTGGCATCATAAGC **+250 bp**

**APC5**

**Wt:** AATCTCACAGCTTGACAATAGTCAGTAATGCATGTGGAACTTGTGGAATCTCTCAGCA  
 AATCTCACAGCTTGACAATAGTCAGTAATGCATGTGGAA-TTTGTGGAATCTCTCAGCA **-1 bp**  
 AATCTCACAGCTTGACAATAGTCAGTAATGCATGTGGAA-----TCTCTCAGCAAGAAATCCTAAAGACCAG **-10 bp**

**Mouse *Usp7***

**Wild type organoids-USP7 CRISPR**

**Wt:**  
 AGACACCAGTTGGCGCTCCGAGGCAACCTTTCAGTTCACTGTCGAGCGCTTCAGCAGACTGAGTGAGTCGGTCCTTAGCCCTCCGTGTTTTGTGCGAAATCTGCCATGGAAGATTA  
 TGGTGATGCCACGCTTTTATCCAGACAGACCACACCAAAAAAGCGTAGGATTCTTTCTCCAGTG  
**CRISPR targeted:**  
 AGACACCAGTTGGCGCTCCGAGGCAACCTTTTCAGTTCACTGTTGGAGCGCTTCAGCAGACTGAGTGAGTCGGTCCTTAGCCCTCCGTGTTTTGTGCGAAATCTGCCATGGAAGATTA  
 TGGTGATGCCACGCTTTTATCCAGACAGACCACACCAAAAA-----AGGATTCTTTCTCCGGTG **-5 bp**  
 AGACACCAGTTGGCGCTCCGAGGCAACCTTTCAGTTCACTGTCGAGCGCTTCAGCAGACTGAGTGAGTCGGTCCTTAGCCCTCCGTGTTTTGTGCGAAATCTGCCATGGAAGATTA  
 TGGTGATGCCACGCTTTTATCCAGACAGACCACACCAAAAAAGCGTAGGATTCTTTCTCCAGTG **wt**

**APC5 organoids-USP7 CRISPR**

**Wt:** GCTCGACAGTGAAGTGAAGGTTGGGTTCGCTCGGAGCGCCAACTGGTGTCTGCAAGAAAAC  
 GCTCGACAGTGAAGTGAAGGTTGGGTTCGCTCGGAGCGCCAACTGGTGTCTGCAAGAAAAC **wt**  
 GCTCGACAGTGAAGTGAAGGTTG-----GAGCGCCAACTGGTGTCTGCAAGAAAAC **-5 bp**

## SUPPLEMENTAL EXPERIMENTAL PROCEDURES

### Antibodies

APC (Calbiochem), AXIN1 (from the Clevers' lab) (Li et al., 2012), Axin1 (C95H11, Cell Signaling), GAPDH (Santa Cruz), GSK3 $\beta$  (Cell Signaling), phospho- $\beta$ -catenin S45 (Cell Signaling), phospho- $\beta$ -catenin S33/S37/T41 (Cell Signaling),  $\beta$ -catenin (BD Transduction), active- $\beta$ -catenin (Millipore, 8E7), Flag (F3165, SIGMA), HA (Y-11) (Santa Cruz), c-Myc (9E10, Santa Cruz), RNF220 (Sigma),  $\beta$ -TrCP (ITK Diagnostics BV and Cell Signaling), ubiquitin (Millipore, FK2) and USP7 (Bethyl Laboratories) were used in immunofluorescence, immunoprecipitations or Western blot analysis.

### Plasmids and other reagents

Full-length USP7 was cloned into XhoI site of pcDNA-Flag or pcDNA-MYC vectors. Various mutants were generated by PCR into pcDNA-Flag or pcDNA-MYC. Mutants include ( $\Delta$ Math-USP7,  $\Delta$ Catalytic-USP7,  $\Delta$ HUBL-USP7 and USP7-C223A). APC overexpression constructs were described in (Li et al., 2012). HBX41108 (Tocris Bioscience) was resuspended in DMSO at 10 mM. DUB inhibitor VI, P22077 (Calbiochem) was resuspended in DMSO at 10 mM (for cell lines experiments) or 15 mg/ml (for mice experiments). Cycloheximide (C7698, SIGMA) was resuspended in ethanol at 50 mg/ml.

### His Pull-Down Assay

APC4 cells were transfected with a His-Ubiquitin expression construct for at least 12 hr before treatment with HBX41108 or DMSO for 16 hr (Fig S5E). Cells were lysed in buffer A and continue with His-pull down protocol. Or APC4 and APC4 USP7 CRISPR cells were transfected with His-Ubiquitin and Flag- $\beta$ -catenin for at least 12 hr (Fig S4J). Lysates were immunoprecipitated using Flag antibody. The immunoprecipitated complexes were washed three times with cold PBS and eluted in buffer A (6M Guanidinium-HCl+ 0.1M Na<sub>2</sub>HPO<sub>4</sub>+ 0.1M NaH<sub>2</sub>PO<sub>4</sub> + 0.01M pH8.0 Tris/HCl + 20mM Imidazole + 10mM  $\beta$ -mercaptoethanol). The eluted supernatants were incubated with buffer A pre-washed Ni<sup>+2</sup>-NTA agarose beads for 4 hr at room temperature (R.T.). After incubation and centrifugation (4000rpm at 2min at R.T.), the pellets were washed once with buffer A, once with buffer B (8M urea, 0.1 M Na<sub>2</sub>HPO<sub>4</sub>/NaH<sub>2</sub>PO<sub>4</sub>, 10 mM Tris-HCl (pH 6.8), 0.005 M imidazole, 0.01 M  $\beta$ -mercaptoethanol), twice with buffer B plus 0.1% Triton-X-100. Elute with elution buffer (0.2 M imidazole, 0.15 M Tris-HCl (pH 6.8), 30% glycerol, 0.72 M  $\beta$ -mercaptoethanol, 5% SDS) for 20 min at RT with gentle agitation. The elution was resuspended in 4XSDS loading sample buffer, and boiled for 5 min. The pull-down samples were subjected to SDS-PAGE for Western blot analysis.

### *In vitro* deubiquitination assay

The *in vitro* deubiquitination assay was performed as previously described (Dar et al., 2013). Briefly, HEK293T cells were transfected with Flag- $\beta$ -catenin, MYC- $\beta$ TrCP and MYC-Ubiquitin for at least 12 hr before treatment with MG132 (10  $\mu$ M) for 4hr. Cells were lysed in cold lysis buffer containing 150 mM NaCl, 30 mM Tris (pH 7.5), 1 mM EDTA, 1% Triton X-100, 10% Glycerol, 0.1 mM PMSF, 0.5 mM DTT, protease inhibitor cocktail tablets (EDTA-free) (Roche), and phosphatase inhibitor cocktail tablets (Roche) supplemented with 10  $\mu$ M MG132. Ubiquitinated  $\beta$ -catenin was purified from the cell extracts using anti-Flag M2 affinity beads (Sigma) and washed extensively. Flag-USP7 was transfected into HEK293T cells and purified using anti-Flag M2 affinity beads (Sigma), which was then eluted with Flag-peptides (SIGMA). For the *in vitro* deubiquitination assay, purified ubiquitinated  $\beta$ -catenin was incubated with or without purified Flag-USP7 in a deubiquitination buffer (50 mM Tris-HCl pH 8.0, 50 mM NaCl, 1 mM EDTA, 10 mM DTT, 5% glycerol) at 37°C for 1hr 30 min. Reactions were terminated by the addition of 4X SDS loading sample buffer and analysed by immunoblot.

### Tandem affinity purification (TAP)-coupled mass spectrometry

Flag- and HA-tagged APC wild type (WT) or APC mutant ( $\Delta$ CID) constructs were transfected to human HEK293T or mouse L-cells followed by TAP as previously described (Nakatani and Ogryzko, 2003). Eluted proteins were separated by SDS-PAGE and eight bands covering the entire lane were excised for each sample. In-gel trypsin digestion was performed using a Perkin Elmer Janus liquid handling system. The peptide samples were subjected to LC-MS/MS analysis using a LTQ-Orbitrap Velos instrument for data acquisition. Raw spectra were

processed using the MaxQuant/Andromeda bioinformatics suite 1.3.0.5 (Cox and Mann, 2008) and further analyzed in Perseus 1.4.0.0. Data was searched against Uniprot fasta databases containing human/mouse sequences. Intensity based absolute quantification (iBAQ) (Schwanhauser et al., 2011) was used for label free quantification. APC WT and APC  $\Delta$ CID were compared in human HEK293T and mouse L-cells to screen for changing interactors. The results were filtered as follows. The original dataset contained 778 human proteins and 997 mouse proteins. Only proteins that received exclusive iBAQ values in the APC  $\Delta$ CID and APC WT were considered as candidates. This reduced the dataset to 268 human proteins and 88 mouse proteins. Further screening of E3 ubiquitin-ligases and DUB enzymes resulted in 7 protein candidates (USP7, UPS30, RNF114, TRIM21, ZFP91, RANBP2 and TRIM32) that showed differential binding between APC WT versus  $\Delta$ CID complexes.

### Peptide Array

Peptide arrays for  $\beta$ -catenin were made from 26 mer peptides derived from  $\beta$ -catenin. Starting from the N terminus, each 26 mer peptide in the array was advanced from the previously by 1 residue in the C-terminal direction. Peptides were arrayed on cellulose membranes (the Crick Peptide Chemistry Platform) and activated using methanol following the protocol described in (Frank and Dubel, 2006). Membranes were washed with TBS three times for 10 min and incubated overnight in 10 ml MBS. Then the membranes were washed once in TBS 0.05% Tween (T-TBS) for 10 minutes and incubate for 2-4 hours in the presence or absence of USP7 recombinant protein (11681-H20BL-25, Sino Biological) sealed in a plastic bag. The membranes were then washed three times in 10 ml of T-TBS (for 10 minutes each) and incubated 1-2 hours with secondary antibody diluted in MBS. After further washes, spots with bound USP7 were detected using anti-rabbit IgG-HRP-conjugated secondary antibody and visualized by chemiluminescence.

### Peptide Synthesis and Pull-Down Experiments

The peptide pull-down was carried out using the following biotinylated peptides generated by the Crick Peptide Chemistry Platform:  $\beta$ -catenin peptide A, Bio-SYLDSGIHS GATTAPSLSGKGNPEE;  $\beta$ -catenin peptide B, Bio-QSFTQEQVADIDGQYAMTRAQVRVAA. 2  $\mu$ g of peptide A and 7  $\mu$ g of peptide B were coupled to 40  $\mu$ l of Streptavidin-coated magnetic beads (Invitrogen). The coupled beads were then incubated with 100 ng of recombinant USP7 (11681-H20BL-25, Sino Biological) in binding buffer (50 mM Tris-HCl pH 7.5, 300 mM NaCl, 0.1% Nonidet NP-40) at 4°C for 2 hours. The beads were washed with TTBS (Tris buffer saline, 0.1% Tween20) and resuspended in 4XSDS loading sample buffer, and boiled for 5 min.

### Gene Editing with CRISPR/Cas9 System

To generate APC truncations, HEK293T cells were transfected with plasmids encoding Cas9 (#41815, Addgene) modified to add puromycin resistance and guideRNAs (gRNAs) (gRNA-GFT-T1 was, #41819, Addgene). Both Addgene plasmids were a kindly gift from George Church (Mali et al., 2013). The GFP targeting sequence was exchanged by inverse PCR followed by DpnI digestion and T4 ligation. Specifically, a common forward primer 5'-phospho-GTTTTAGAGCTAGAAATAGCAAGTTAAAATAAGG-3' was used in combination with target specific reverse primers (i.e. reverse complement target sequences without the PAM were fused to the 5' end of a common reverse oligo 5'-CGGTGTTTCGTCCTTCCACAAGAT-3') to generate pU6-sgRNA by using the high-fidelity Phusion polymerase (NEB) on the gRNA-GFT-T1. These gRNAs were targeting specific genomic loci. Guide RNA sequences for APC targeting were shown in Table S1. For APC4 and SW480, two USP7 guide RNAs were used: gRNA1, 5'-ATCATTTAAACTGTCTTACG-3' and gRNA2: 5'-TTAGTCTAAGTCGTAACGTG-3'. For SUP7 targeting in HEK293T and HCT116 cells, either gRNA1, 5'-AGACCACACCAAAAAGCGT-3' or gRNA2 5'-GGCATCACCATAATCTTCCA-3' were used. SW480 or HCT116 cells were transfected with plasmids encoding Cas9 and gRNAs (PX459, #62988, Addgene which was a gift from Feng Zhang lab) (Ran et al., 2013). We screened the potential targeted cells by immunoblotting and then confirmed by genomic DNA sequencing.

### Real-time quantitative RT-PCR

RNA was extracted according to the manufacturer's instructions (Qiagen RNeasy). cDNA was prepared using Maxima first strand cDNA synthesis kit with dsDNase (#1672, Thermo Scientific). Quantitative PCR detection was performed using iTaq SYBR Green Supermix (#172-5121, Bio Rad) using specific primers to: hUSP7: F: 5' TATGGGGAGTGAAGTGACCGAT 3' R: 5' CATGTACACAGCCTTTCGTAGC 3'; h $\beta$ -actin F: 5' TTCTACAATGAGCTGCGTGTG 3' R: 5' GGGGTGTTGAAGGTCTCAAA 3'; hCyclin D1: F: 5' CTCCGCCTCTGGCATTGTTGG 3' R: 5' TCTCCTTGCAGCTGCTTAG 3'; hCD44: F: 5'

AGAAGGTGTGGGCAGAAGAA 3' R: 5' AAATGCACCATTTCCTGAGA 3'; hAxi2: F: 5'  
AGTGTGAGGTCCACGGAAAC 3' R: 5'CTTCACACTGCGATGCATTT 3'; hAPC: F: 5'  
GAGAGTGCAGTCCTGTTCCT 3' R: 5' GTGAGATTCTGAAGTTGAGCGT 3'; hCTNNB1: F: 5'  
ACTTTTCCCATCATCGTGAG 3' R: 5' AATCCACTGGTGAACCAAGC 3'; *mUSP7*: F: 5'  
TGCTGAATCTGACTCCACGT 3' R: 5' CCCAGTCGTTTCCTTGTGG 3'; *mLys* F:  
AAAGGAATGGAATGGCTGGC 3' R: 5' TCGGTTTTGACAGTGTGCTC 3'; *mChgA* F: 5'  
GCCACCAATACCCAATCACC 3' R: CCTCCTCTTCCTCCTCCTCT 3'; *mMucin2* F: 5'  
TCTACCTCACCCACAAGCTG 3' R: 5'TGGTCTGCATGCCATTGAAG 3'; *mAlpi* F: 5'  
TCAACGAGATCCCCTGATGG 3' R: 5'TATGGTCAGAGTGTGCGCGTT 3'; *mDelk1* F: 5'  
CGCTTCAGATCTTTCGAGGC 3' R: 5' CCGCAGACATAGCTTTCACC 3'; *mHrpt1*: F:  
5'TCATGAAGGAGATGGGAGGC 3' After cDNA amplification (40 cycles), samples were normalized to  $\beta$ -actin (human) or *Hrpt1* (mouse), and data were expressed as mean  $\pm$  SD.

### Immunofluorescence

HEK293T cells were grown on 12-well coverslips in 12-well plates precoated with poly-L-lysine (Sigma), fixed with 4% paraformaldehyde (PFA) for 15 min, and permeabilized by 0.2% Triton X-100 in PBS for 10 min. Cells were blocked with 0.5% BSA in PBS for 1h and followed by primary anti- $\beta$ -catenin antibody (BD Biosciences) incubation at 4°C overnight. Cells were washed three times with PBS and incubated with the secondary antibodies conjugated to Alexa-Fluor 488 at room temperature for 1h. Cells were washed three times with PBS and stained with DAPI for 10 min. Coverslips were washed another three times with PBS and were then mounted with Aqua Poly/Mount (Polysciences).

### Immunohistochemistry

For analysis of small intestine and colon by immunohistochemistry, tissues were fixed in 10% formalin and embedded in paraffin. Sections were deparaffinized with xylene and rehydrated in a graded series of ethanol. Antigen-retrieval was performed for 20 min at high temperature in citrate buffer. Then, slides were blocked and incubated overnight with anti-ki67 (SP6, Abcam) anti- $\beta$ -catenin (BD, Biosciences) or negative control at 4°C. Finally, slides were incubated with the secondary antibody for 1h, washed three times with PBS and incubated with peroxidase substrate, and mounted. The expression of Ki67 or  $\beta$ -catenin was visualized using a bright-field microscope.

### MTT assay

MTT assay was used to monitor cell viability after P22077 and HBX19818 treatment in cells using MTS Reagent Powder (G111B, Promega) as described in (Mosmann, 1983).

### Colony formation assay

SW480 and HEK293T cells were trypsinized and counted prior seeding. 2000 cells per condition were seeded in 6-well plates and cultured for 15 days. The plates were then fixed with 4%PFA for 5 minutes followed by crystal violet staining. Number of colonies formed in each well was then counted. Experiments were performed in triplicates

### Intestinal organoid culture

Organoids were established from freshly isolated wild type small intestine or tumors isolated from *Apc<sup>min</sup>* mice. Tissues were incubated in cold PBS containing 2mM EDTA for isolating epithelial crypts and cultured as previously as described (Sato et al., 2009) except that Matrigel was replaced with Cultrex® BME, Type 2 RGF PathClear (Amsbio, 3533-010-02). In brief, the organoid basal media contains EGF (Invitrogen PMG8043), Noggin and R-spondin (ENR). Noggin and R-spondin conditioned media (CM) were generated from HEK293T cells. Wnt3a CM was generated from L cells. The Rho kinase inhibitor Y-27632 (Sigma) was added to the culture when trypsinized.

### Organoid imaging

Organoids were grown in 20  $\mu$ l of RGF BME into an 8-well chamber slide (Lab-Tek II, 154534). When indicated, 10  $\mu$ M EdU was added to the growth media for 2 hours before fixing. Organoids were fixed in formalin for 30 minutes. They were then permeabilized in 0.8% Triton for 20 minutes and blocked in IF Buffer (0.2% Triton, 0.05% Tween, 1% BSA, PBS) for 1 hour or processed for EdU staining according to manufacturer's instruction with the Click-iT Edu Alexa Fluor 647 Imaging kit (Invitrogen C10340). For immunofluorescent staining, cells were incubated with primary antibodies overnight in IF buffer: rabbit anti-KRT20 (1:200, Cell Signaling Technologies, #13063), rabbit anti-Mucin2 (1:600, Santa Cruz, H-300, sc-1534), anti-Lysozyme (1:600, Dako, #EC3.2.1.17). They were then washed 3 times with TBS-1% Tween and secondary antibodies (1:1000 in IF

Buffer) were incubated for 1h at room temperature. When indicated, organoids were washed 3 times with TBS-1% Tween and were incubated with Phalloidin-FITC (SIGMA, P5282) for 1 hour at 4°C. Then the solution was removed and DAPI was incubated in IF buffer for 10 minutes and washed three times with TBS-1% Tween. The chambers were then removed and cover slips were mounted using Prolong Gold antifade medium (Invitrogen P36930). Images were acquired using Leica Confocal DM 2500 and the Leica Application Suite software. Images were processed using FIJI (Image J) and Photoshop CS5 software (Adobe Systems Inc, San Jose, Ca).

#### **CRISPR/Cas9-gRNA lentivirus production**

HEK293T were seeded in a 15 cm plate at high confluence. Before transfection, the media was changed to DMEM without FBS. Cells were then transfected with 60 µg of lentiCRISPR (#52961, Addgene which was a kindly gift from Feng Zhang lab) (Sanjana et al., 2014), 50 µg Pax2 and 16.6 µg VSVG using OPTI-MEM (GIBCO) and PEI (1mg/ml) 1:3 (PEI: DNA) ratio. After 6 hours, the supernatant was discarded and changed to DMEM plus 10% FBS. 48 hours later, the media was collected and filtered through 0.45 µm filter and centrifuged at 20 000 rpm for 1:40 hours at 4°C. The pellet was then resuspended in 250 µl of DMEM Basal Media (Advanced DMEM F/12 containing Pen/Strep, Glutamine and HEPES) and added directly to the trypsinized organoids as concentrated virus or froze at -80°C.

#### **CRISPR targeting of intestinal organoids**

Mouse organoids were CRISPR targeted using lentiCRISPR v2 which was a kindly gift from Feng Zhang (#52961, Addgene). The cloning protocol used is described: <http://genome-engineering.org/gecko>. Two different guideRNAs were used to target USP7 in organoids. gRNA1: 5'-TGCCTCGGAGCGCCAACACTGG-3' and gRNA2: 5'-CTGAATCTGACTCCACGTCG-3'. Mouse organoids were cultured in ENR media plus Nicotinamide and Wnt3a CM prior CRISPR-targeting to enrich for stem cells. Before infection, organoids were trypsinized and resuspended in ENR medium plus Nicotinamide, Wnt3a CM, Rho kinase inhibitor Y-27632 and polybrin (8 µg/ml). The resuspended organoids were then mixed with the concentrated virus supernatant and seeded in 48 well plates at high density. The plate was centrifuged at 600 g at 32 °C for 1 hour, and incubated for 4 hours at 37°C before replating in BME with growth medium plus Y-27632. Growth medium was then switched to selection medium containing 2 µg/ml puromycin 3 days post infection.

#### **Cell Titer Glo**

Organoids were trypsinized and counted. 2000 single cells were seeded in BME per 48 well and placed in a 37°C incubator to polymerize for 20 minutes. 300 µl of small intestinal organoid growth media (see above) plus Y-27632 was then added and cultured for the indicated times. Cell titer Glo Luminiscent Cell viability assay (G7572, Promega) was used to assess viability of the organoids.

#### **Organoid colony formation assay**

Organoids were trypsinized and counted. 2000 single cells were seeded in BME per 48 well and placed in a 37°C incubator to polymerize for 20 minutes. 300 µl of small intestinal organoid growth media (see above) plus Y-27632 was then added and cultured for 7 days. Number of spheres formed in each well was counted as plating efficiency. Experiments were performed in quadruplicate.

#### **Xenograft experiments**

5 x 10<sup>6</sup> human SW480 or HCT116 cells were subcutaneously injected into both flanks of 6-8-week-old SCID mice. For the USP7 inhibitor experiments, SW480-derived xenografts were allowed to grow 2-3 mm before randomizing the mice into a control group (DMSO) or P22077 (30 mg/kg) by intraperitoneal injection every day for 21 days. At the end of the experiments, all mice were killed. Tumors were collected, weighted, and photographed and were freeze with liquid nitrogen till they were processed for RNA or protein extraction. All mice were housed in a pathogen-free environment and handled in strict accordance to institutional protocol.

#### **Supplemental References**

Cox, J., and Mann, M. (2008). MaxQuant enables high peptide identification rates, individualized p.p.b.-range mass accuracies and proteome-wide protein quantification. *Nat Biotechnol* 26, 1367-1372.

Dar, A., Shibata, E., and Dutta, A. (2013). Deubiquitination of Tip60 by USP7 determines the activity of the p53-dependent apoptotic pathway. *Mol Cell Biol* 33, 3309-3320.

Frank, R., and Dubel, S. (2006). Analysis of protein interactions with immobilized Peptide arrays synthesized on membrane supports. *CSH Protoc* 2006.

Li, V. S., Ng, S. S., Boersema, P. J., Low, T. Y., Karthaus, W. R., Gerlach, J. P., Mohammed, S., Heck, A. J., Maurice, M. M., Mahmoudi, T., and Clevers, H. (2012). Wnt signaling through inhibition of beta-catenin degradation in an intact Axin1 complex. *Cell* *149*, 1245-1256.

Mali, P., Yang, L., Esvelt, K. M., Aach, J., Guell, M., DiCarlo, J. E., Norville, J. E., and Church, G. M. (2013). RNA-guided human genome engineering via Cas9. *Science* *339*, 823-826.

Mosmann, T. (1983). Rapid colorimetric assay for cellular growth and survival: application to proliferation and cytotoxicity assays. *J Immunol Methods* *65*, 55-63.

Nakatani, Y., and Ogryzko, V. (2003). Immunoaffinity purification of mammalian protein complexes. *Methods Enzymol* *370*, 430-444.

Ran, F. A., Hsu, P. D., Wright, J., Agarwala, V., Scott, D. A., and Zhang, F. (2013). Genome engineering using the CRISPR-Cas9 system. *Nat Protoc* *8*, 2281-2308.

Sanjana, N. E., Shalem, O., and Zhang, F. (2014). Improved vectors and genome-wide libraries for CRISPR screening. *Nat Methods* *11*, 783-784.

Sato, T., Vries, R. G., Snippert, H. J., van de Wetering, M., Barker, N., Stange, D. E., van Es, J. H., Abo, A., Kujala, P., Peters, P. J., and Clevers, H. (2009). Single Lgr5 stem cells build crypt-villus structures in vitro without a mesenchymal niche. *Nature* *459*, 262-265.

Schwanhauser, B., Busse, D., Li, N., Dittmar, G., Schuchhardt, J., Wolf, J., Chen, W., and Selbach, M. (2011). Global quantification of mammalian gene expression control. *Nature* *473*, 337-342.
